# Supplementary material
Source: Elsevier journal article supplement (https://www.sciencedirect.com/science/article/pii/S0213005X17301908)
Supplement: mmc1 [file S0213005X17301908:mmc1.pdf]

## DOCUMENTO DE CONSENSO

# Documento de consenso sobre diagnóstico y tratamiento de las infecciones de transmisión sexual en adultos, niños y adolescentes

Grupo de Expertos del Grupo de Estudio de Sida de la SEIMC (GESIDA), Secretaria del Plan Nacional sobre el Sida (SPNS), Grupo de Estudio de ITS de la SEIMC (GEITS), Grupo Español para la Investigación de las Enfermedades de Transmisión sexual de la Academia Española de Dermatología y Venerología y de la Sociedad Española de Infectología Pediátrica (SEIP)

---

## RESUMEN

Las infecciones de transmisión sexual (ITS) son uno de los problemas más frecuentes y universales de Salud Pública. La infección por el virus de la inmunodeficiencia humana (VIH) y las ITS están claramente interrelacionadas, compartiendo riesgos, incidencia y mecanismos de transmisión.

El objetivo de este Documento es dar a conocer a los profesionales sanitarios la situación actual y el manejo de aquellas ITS, que por su relevancia, necesitan una mayor atención, tanto en población general como en población con el VIH.

Estas directrices para el tratamiento de las ITS aunque orientadas desde el punto de vista clínico y centrado especialmente en el tratamiento, también recogen otros aspectos relacionados con la evaluación y valoración del paciente así como recomendaciones de diagnóstico.

## ABSTRACT

Sexually transmitted diseases (STD) are one of the most frequent and universal problems of Public Health. Infection by human immunodeficiency virus (HIV) and STD are clearly interrelated, sharing risks, incidence and transmission mechanisms.

The aim of this document is to inform health professionals about the current situation and management of STDs, which, because of their relevance, need greater attention, both in the general population and in the population with HIV.

These guidelines for STD treatment, although oriented from a clinical viewpoint and focused especially on treatment, gather other aspects related to assessment and evaluation of the patient, as well as recommendations for diagnosis.

**Palabras clave:** VIH; ITS; Salud sexual

**Key words:** HIV; STD; Sexual health

## 1. INTRODUCCIÓN

Las infecciones de transmisión sexual (ITS) son uno de los problemas más frecuentes y universales de Salud Pública. Su elevada morbilidad y la posibilidad de secuelas, tanto a medio como a largo plazo, hacen que los profesionales de salud deban tener unos conocimientos básicos, pero suficientes para el correcto manejo de las mismas, tanto en su prevención y abordaje como en el diagnóstico, tratamiento, búsqueda de contactos y seguimiento. La infección por el virus de la inmunodeficiencia humana (VIH) y las ITS están claramente interrelacionadas, compartiendo riesgos, incidencia y mecanismos de transmisión<sup>1-4</sup>.

Los profesionales de la salud desempeñan un papel crítico en su prevención y tratamiento. Estas directrices para el tratamiento de las ITS aunque orientadas desde el punto de vista clínico y centrado especialmente en el tratamiento, también recogen otros aspectos relacionados con la evaluación y valoración del paciente así como recomendaciones de diagnóstico. El lector no encontrará el abordaje de otros servicios comunitarios y de otras intervenciones, que siendo esenciales para los esfuerzos de prevención de ITS, serán recogidos en otro documento.

### 1.1. Objetivo

El objetivo de este documento es dar a conocer a los profesionales sanitarios la situación actual y el manejo de aquellas ITS, que por su relevancia, necesitan una mayor atención, tanto en población general como en población con el VIH. Este documento actualiza el *“Consenso sobre infecciones de transmisión sexual en personas con infección por el VIH”* publicado en 2010 por la Secretaría del Plan Nacional sobre el Sida (SPNS) y el Grupo de Estudio de Sida (GeSIDA)<sup>5</sup>. Estas recomendaciones hay que valorarlas como una

fuentes de orientación clínica, debiendo considerar siempre, las circunstancias clínicas de cada persona y el contexto en el que se desarrollan.

## **1.2. Metodología**

El Panel redactor del documento está integrado por clínicos expertos en infección por el VIH y las ITS (internistas con dedicación profesional a enfermedades infecciosas y el VIH, dermatólogos, epidemiólogos, microbiólogos y pediatras) designados por la Junta Directiva de GeSIDA, el PNS y la Junta Directiva del Grupo de ITS de la SEIMC (GeITS), que han aceptado participar voluntariamente y emitir una declaración de conflictos de interés. Estos expertos se han distribuido en grupos formados por redactores y consultores que se han encargado de actualizar una sección del documento. Tres miembros del Panel han actuado como coordinadores y su cometido ha sido ensamblar todas las secciones del documento y encargarse de la redacción y edición final del mismo.

Los redactores de cada grupo han revisado los datos más relevantes de las publicaciones científicas (PubMed y Embase; idiomas: español e inglés) y de las comunicaciones a los congresos más recientes hasta el 30 de octubre de 2016.

El texto elaborado por el redactor se ha sometido a la consideración de sus consultores incorporándose las aportaciones aceptadas por consenso. Una vez ensambladas todas las secciones, el documento se ha discutido y consensuado en una reunión del Panel. Tras la incorporación de las modificaciones aprobadas en dicha reunión, el documento se expone durante 15 días en las páginas web de GeSIDA, del PNS y del GeITS para que profesionales, pacientes o quien esté interesado pueda hacer sugerencias que, tras su estudio y deliberación, pueden ser integradas en el documento final. El Panel considera que en el caso de aparecer nuevas evidencias relevantes que impliquen cambios serán incorporadas al documento en las páginas web y, a ser posible, en la publicación.

Las recomendaciones de estas guías se basan en la evidencia científica y en la opinión de expertos. Cada recomendación se califica con una letra que indica su fuerza [A (debe ofrecerse siempre), B (en general debe ofrecerse) o C (debe ofrecerse opcionalmente)] y un número que expresa las pruebas que sustentan dicha recomendación [I (resultados obtenidos a partir de uno o más ensayos clínicos aleatorizados de aspectos clínicos o de laboratorio o un metaanálisis); II (de uno o más ensayos no aleatorizados o datos observacionales de cohortes); y III (en la opinión de expertos)].

GeSIDA, el PNS y el GeITS, seguirán actualizando este documento periódicamente en función de la evolución de los conocimientos. No obstante se recuerda que, dado que éstos

cambian muy rápidamente, es conveniente que los lectores consulten también otras fuentes de información.

## **2. MEDIDAS GENERALES DE PREVENCIÓN Y CONTROL DE LAS ITS**

### **2.1. Valoración del riesgo**

La evaluación del riesgo individual para las ITS requiere realizar una historia clínica, que incluya preguntas sobre su conducta sexual y otros factores de riesgo, siendo los reiteradamente citados en las principales guías clínicas sobre ITS<sup>6</sup>.

- a) Tener menos de 25 años.
- b) Mantener contacto sexual con persona con una ITS.
- c) Mantener relaciones sexuales con diferentes parejas.
- d) Tener una nueva pareja sexual en los últimos meses.
- e) Antecedentes previos de ITS.
- f) Profesionales de la prostitución y sus clientes.
- g) Consumo de drogas y/o alcohol, especialmente asociados a las relaciones sexuales.
- h) Uso inconsistente del preservativo con parejas casuales.
- i) Ser víctima de violencia sexual.

A veces estas preguntas resultan difíciles dada su naturaleza íntima, por lo que es importante entrevistar al paciente a solas, explicándole la necesidad de preguntar sobre su vida sexual, insistiendo en que se garantizará la confidencialidad. Esto requiere que el acceso a la historia sexual y de ITS sea restringido. Es conveniente comenzar con las preguntas “menos sensibles” (primero historia clínica general, pasando después a la historia sexual). Las preguntas serán abiertas sin hacer suposiciones respecto a las conductas sexuales del paciente ni sobre el sexo de sus parejas y no asumir que el paciente conoce el significado de términos sexuales (felación, cunnilingus...) por lo que es importante utilizar un vocabulario adecuado para cada paciente (Tabla 1).

**Tabla 1. Elementos a tener en cuenta para valorar el riesgo de ITS**

| <b>Relaciones</b>            |                                                                                                                                                                                                                                                                                                                                                   |
|------------------------------|---------------------------------------------------------------------------------------------------------------------------------------------------------------------------------------------------------------------------------------------------------------------------------------------------------------------------------------------------|
| Situación actual             | <ul style="list-style-type: none"> <li>• Pareja habitual. ¿Desde hace cuánto tiempo?</li> </ul>                                                                                                                                                                                                                                                   |
| Identificar problemas        | <ul style="list-style-type: none"> <li>• ¿Tienes alguna preocupación acerca de tu relación? (infidelidad, violencia, abuso...)</li> </ul>                                                                                                                                                                                                         |
| <b>Conductas sexuales</b>    |                                                                                                                                                                                                                                                                                                                                                   |
| Parejas                      | <ul style="list-style-type: none"> <li>• Último contacto sexual. ¿fue con la pareja habitual o con otra persona?</li> <li>• ¿Con cuántas personas has tenido relaciones en los últimos tres meses?, ¿en el último año?</li> <li>• ¿Relaciones con personas otros países?</li> <li>• ¿Contactos por internet, saunas, cuarto oscuro...?</li> </ul> |
| Preferencias sexuales        | <ul style="list-style-type: none"> <li>• ¿Tienes relaciones con mujeres, con hombres o con transexuales?</li> </ul>                                                                                                                                                                                                                               |
| Prácticas sexuales           | <ul style="list-style-type: none"> <li>• ¿Qué tipo de relaciones sexuales tienes?: ¿penetración vaginal?, ¿relaciones buco-genitales (sexo oral)? ¿penetración anal? (activa, pasiva)</li> </ul>                                                                                                                                                  |
| Protección                   | <ul style="list-style-type: none"> <li>• ¿Utilizas preservativo?, ¿siempre, a veces, nunca?, ¿desde el principio o solo para la eyaculación?</li> <li>• Con quién: ¿con la pareja habitual, con contactos ocasionales?</li> <li>• En qué tipo de prácticas: penetración vaginal, anal, sexo oral.</li> </ul>                                      |
| <b>Historia de ITS</b>       |                                                                                                                                                                                                                                                                                                                                                   |
| Cribados previos             | <ul style="list-style-type: none"> <li>• ¿Te has hecho alguna vez pruebas de ITS y/o VIH? ¿Cuándo fue la última vez?</li> </ul>                                                                                                                                                                                                                   |
| ITS previas                  | <ul style="list-style-type: none"> <li>• ¿Has tenido alguna ITS? ¿Cuál? ¿Cuándo?</li> </ul>                                                                                                                                                                                                                                                       |
| <b>Historia reproductiva</b> |                                                                                                                                                                                                                                                                                                                                                   |
| Anticoncepción               | <ul style="list-style-type: none"> <li>• Método anticonceptivo.</li> </ul>                                                                                                                                                                                                                                                                        |
| Embarazos                    | <ul style="list-style-type: none"> <li>• Nº de gestaciones, abortos, partos, complicaciones</li> <li>• ¿Problemas reproductivos?</li> </ul>                                                                                                                                                                                                       |
| Citología                    | <ul style="list-style-type: none"> <li>• ¿Citologías previas? Resultados. ¿Cuándo fue la última?</li> </ul>                                                                                                                                                                                                                                       |
| <b>Drogas</b>                |                                                                                                                                                                                                                                                                                                                                                   |
| Consumo de drogas            | <ul style="list-style-type: none"> <li>• ¿Consumes algún tipo de drogas?, ¿alcohol?</li> </ul>                                                                                                                                                                                                                                                    |
| Sexo y drogas                | <ul style="list-style-type: none"> <li>• ¿Has tenido relaciones sexuales bajo la influencia del alcohol u otras drogas?, ¿con qué frecuencia?</li> </ul>                                                                                                                                                                                          |
| <b>Historia psicosocial</b>  |                                                                                                                                                                                                                                                                                                                                                   |
| Prostitución                 | <ul style="list-style-type: none"> <li>• ¿Has pagado alguna vez por sexo?, ¿con qué frecuencia?, ¿cuándo fue la última vez?</li> </ul>                                                                                                                                                                                                            |
| <b>Vacunas</b>               |                                                                                                                                                                                                                                                                                                                                                   |
| Vacunas recibidas            | <ul style="list-style-type: none"> <li>• Hepatitis A, Hepatitis B, VPH</li> </ul>                                                                                                                                                                                                                                                                 |

Adaptado de: *Canadian Guidelines on Sexually Transmitted Infections*<sup>2</sup>, *CDC Sexually Transmitted Diseases Treatment Guidelines, 2015*<sup>3</sup> y *2013 UK national guideline for consultations requiring sexual history taking*<sup>4</sup>

## 2.2. Cribado de ITS en poblaciones en riesgo

El interés de efectuar un despistaje de las ITS radica en que éstas pueden cursar de forma asintomática, pero desarrollar complicaciones graves sin tratamiento<sup>6</sup>. La identificación precoz no sólo permite el tratamiento adecuado inmediato, sino iniciar el estudio de contactos, lo que comporta un beneficio tanto individual como de salud pública, al cortar la cadena de transmisión y con ello prevenir nuevas infecciones.

Los despistajes de las ITS más frecuentes en función de las poblaciones en riesgo se muestran en la tabla 2<sup>1,8-16</sup>. No se han incluido otras menos frecuentes (*Chlamydia trachomatis* serotipos L1-L3, *Haemophilus ducreyi*, *Klebsiella granulomatis*, *Pthirus pubis* y *Sarcoptes scabiei*). No se recomienda el cribado de rutina para *Mycoplasma genitalium*, y virus del herpes simple. En todas las poblaciones con prácticas de riesgo de ITS, hay que descartar además, la infección por el VIH.

Mención especial merece el cribado del VPH en mujeres infectadas por el VIH ya que el riesgo difiere de la población general. El cribado debe comenzar antes debido a que las adolescentes con el VIH sexualmente activas, tienen una alta tasa de progresión de citología anormal<sup>13</sup> teniendo mayor riesgo de infección por VPH de alto riesgo y de neoplasia intraepitelial cervical (CIN)<sup>18</sup>. El uso de co-test (prueba VPH y citología) ha mostrado un fuerte valor predictivo negativo de prueba de VPH en esta población<sup>19,20</sup>.

**Tabla 2. Cribado de las ITS más frecuentes según poblaciones en riesgo**

| Población en riesgo                                            | Agente etiológico                             | Periodicidad cribado                                                                                                                     | Técnicas diagnósticas                                                                                                                       | Tratamiento                                                                                               |
|----------------------------------------------------------------|-----------------------------------------------|------------------------------------------------------------------------------------------------------------------------------------------|---------------------------------------------------------------------------------------------------------------------------------------------|-----------------------------------------------------------------------------------------------------------|
| <b>Embarazadas</b> (riesgo infección intrauterina o perinatal) | VIH                                           | 1º trimestre. Repetir en 2º y tercer trimestre si persiste el riesgo. En el parto si no hay determinaciones previas o todavía hay riesgo | Serológico:<br>2 EIA de 4ª generación (antígeno p24 y anticuerpos)<br><br>Confirmación : WB o LIA                                           | Serología positiva:<br>Antirretrovirales y profilaxis infecciones oportunistas                            |
|                                                                | VHB                                           |                                                                                                                                          | Serología: anti HBs, HBsAg y anti-HBc. Si negativo vacunación.                                                                              | Inmunoglobulinas NN                                                                                       |
|                                                                | <i>Chlamydia trachomatis</i> (serotipos D-K)) |                                                                                                                                          | PCR <i>múltiple</i> gonococo/Clamidia (escobillón vaginal, rectal y orofaríngeo [en sexo receptivo oral o anal])                            | Azitromicina<br>Control a los 3-4 meses                                                                   |
|                                                                | <i>Treponema pallidum</i>                     |                                                                                                                                          | Serológico: Prueba treponémica (MEIA, CLIA u otro EIA) + Prueba no treponémica (RPR). Si ambas positivas, tratamiento.                      | Penicilina G<br><br>Alternativas para los pacientes alérgicos a la penicilina: azitromicina o ceftriaxona |
|                                                                | <i>Neisseria gonorrhoeae</i>                  |                                                                                                                                          | Microscopia óptica, cultivo o PCR <i>múltiple</i> gonococo/Clamidia (escobillón vaginal en mujeres). Si positivo para gonococo, tratamiento | Ceftriaxona<br>+<br>azitromicina                                                                          |
|                                                                | VHC                                           |                                                                                                                                          | Serología. Anti-VHC (EIA).                                                                                                                  | No. Seguimiento de la carga vírica por PCR                                                                |
| Población en riesgo                                            | Agente etiológico                             | Periodicidad cribado                                                                                                                     | Técnicas diagnósticas                                                                                                                       | Tratamiento                                                                                               |
| <b>Jóvenes menores de 25 años</b> (activos sexualmente)        | VIH                                           | En función de la valoración del riesgo                                                                                                   | Indicado anteriormente                                                                                                                      | Indicado anteriormente                                                                                    |
|                                                                | <i>Chlamydia trachomatis</i>                  |                                                                                                                                          |                                                                                                                                             |                                                                                                           |
|                                                                | <i>Treponema pallidum</i>                     |                                                                                                                                          |                                                                                                                                             |                                                                                                           |
|                                                                | <i>Neisseria gonorrhoeae</i>                  |                                                                                                                                          |                                                                                                                                             |                                                                                                           |

|                                           |                                           |                                                                                                                                                  |                                                                  |                                                   |
|-------------------------------------------|-------------------------------------------|--------------------------------------------------------------------------------------------------------------------------------------------------|------------------------------------------------------------------|---------------------------------------------------|
|                                           | VHA, VHC                                  |                                                                                                                                                  |                                                                  |                                                   |
| Hombres y mujeres heterosexuales          | VIH                                       | En función de la valoración del riesgo                                                                                                           | Indicado anteriormente                                           | Indicado anteriormente                            |
|                                           | <i>Chlamydia trachomatis</i>              |                                                                                                                                                  |                                                                  |                                                   |
|                                           | <i>Treponema pallidum</i>                 |                                                                                                                                                  |                                                                  |                                                   |
|                                           | <i>Neisseria gonorrhoeae</i>              |                                                                                                                                                  |                                                                  |                                                   |
|                                           | <i>Trichomonas vaginalis</i> (en mujeres) |                                                                                                                                                  |                                                                  |                                                   |
|                                           | VHA, VHB, VHC                             |                                                                                                                                                  |                                                                  |                                                   |
|                                           | VPH <sup>21</sup><br>(solo mujeres)       | <21 años no cribado.<br>21-29 años solo citología cada 3 años.<br>30-65 años co-test (citología y VPH) cada 5 años o solo citología cada 3 años. |                                                                  |                                                   |
| <b>Población en riesgo</b>                | <b>Agente etiológico</b>                  | <b>Periodicidad cribado</b>                                                                                                                      | <b>Técnicas diagnósticas</b>                                     | <b>Tratamiento</b>                                |
| Hombres que tienen sexo con Hombres (HSH) | VIH                                       | Anualmente.<br>Si mayor riesgo, cada 3-6m                                                                                                        | Indicado anteriormente                                           | Indicado anteriormente                            |
|                                           | <i>Chlamydia trachomatis</i>              |                                                                                                                                                  |                                                                  |                                                   |
|                                           | <i>Treponema pallidum</i>                 |                                                                                                                                                  |                                                                  |                                                   |
|                                           | <i>Neisseria gonorrhoeae</i>              |                                                                                                                                                  |                                                                  |                                                   |
|                                           | VHA                                       |                                                                                                                                                  | Serología. anti-VHA IgG+IgM . Si negativa, inmunización.         | Vacunación VHA                                    |
|                                           | VHB                                       |                                                                                                                                                  | Serología. Anti HBs, anti-HBc y HBsAg. Si negativo, inmunización | Vacunación VHB y titulación posterior de anti-HBs |

|                                       |                                                       |                                                                                        |                                                                                                                                            |                                            |
|---------------------------------------|-------------------------------------------------------|----------------------------------------------------------------------------------------|--------------------------------------------------------------------------------------------------------------------------------------------|--------------------------------------------|
|                                       | VHC                                                   | Anualmente.<br>Si mayor riesgo, cada 3-6m                                              | Serología. anti-VHC                                                                                                                        | No. Seguimiento de la carga vírica por PCR |
| <b>Personas infectadas por el VIH</b> | <i>Chlamydia trachomatis</i>                          | Evaluación inicial y anualmente o más frecuente en función de la valoración del riesgo | Indicado anteriormente                                                                                                                     | Indicado anteriormente                     |
|                                       | <i>Treponema pallidum</i>                             |                                                                                        | Indicado anteriormente                                                                                                                     | Indicado anteriormente                     |
|                                       | <i>Neisseria gonorrhoeae</i>                          |                                                                                        | Indicado anteriormente                                                                                                                     | Indicado anteriormente                     |
|                                       | <i>Trichomonas vaginalis</i> (en mujeres)             |                                                                                        | Exudado cervical o vaginal en mujeres. Exudado uretral en hombres. Microscopia óptica y PCR (escobillón vaginal). Si positiva, tratamiento | Metronidazol                               |
|                                       | VHA (HSH e infectados crónicamente por VHB y/ o VHC ) | Evaluación inicial, si negativa vacunación                                             | Indicado anteriormente                                                                                                                     | Indicado anteriormente                     |
|                                       | VHB                                                   | Evaluación inicial. Si negativa vacunación                                             |                                                                                                                                            |                                            |
|                                       | VHC                                                   | Evaluación inicial y anualmente. Si mayor riesgo mayor frecuencia                      |                                                                                                                                            |                                            |

|                                                                               |                                                                                                                   |                                                                                                                                                                                                                                                                                                                                                                                                                                                                                         |                                                                                                |                        |
|-------------------------------------------------------------------------------|-------------------------------------------------------------------------------------------------------------------|-----------------------------------------------------------------------------------------------------------------------------------------------------------------------------------------------------------------------------------------------------------------------------------------------------------------------------------------------------------------------------------------------------------------------------------------------------------------------------------------|------------------------------------------------------------------------------------------------|------------------------|
|                                                                               | VPH (Mujeres) <sup>18</sup>                                                                                       | <p>&lt;30 años solo citología. Si citología inicial normal repetir al año. Tras 3 citologías consecutivas anuales normales pasar a repetir cada 3 años.</p> <p>&gt;30 años citología solo o co-test (prueba VPH y citología) .</p> <p>Tras 3 citologías consecutivas anuales normales pasar a repetir cada 3 años.</p> <p>Si un co-test negativo repetir cribado cada 3 años.</p> <p>No suspender el cribado a los 65 años.</p> <p>Si CD4&lt;200 cels/mm<sup>3</sup> revisión anual</p> |                                                                                                |                        |
| <b>Personas que ejercen la prostitución</b>                                   | Igual a heterosexuales o HSH dependiendo de las prácticas sexuales                                                | En función de la valoración del riesgo                                                                                                                                                                                                                                                                                                                                                                                                                                                  | Indicado anteriormente                                                                         | Indicado anteriormente |
| <b>Transexuales</b>                                                           | <i>Chlamydia trachomatis</i><br><i>Treponema pallidum</i><br><i>Neisseria gonorrhoeae</i><br>VIH, VHA, VHB y VHC  | En función de la valoración del riesgo                                                                                                                                                                                                                                                                                                                                                                                                                                                  | Indicado anteriormente. La toma de muestra se realizará en función de la evaluación individual | Indicado anteriormente |
| <b>Personas que ingresan en instituciones penitenciarias o correccionales</b> | <i>Chlamydia trachomatis</i> ,<br><i>Neisseria gonorrhoeae</i><br>VIH, VHB, VHC<br>Otras ITS : no hay directrices | Evaluación al ingreso                                                                                                                                                                                                                                                                                                                                                                                                                                                                   | Indicado anteriormente                                                                         | Indicado anteriormente |

## **Recomendaciones**

1. *Se recomienda efectuar cribado de las ITS en personas sexualmente activas integrantes de colectivos con alta prevalencia de ITS, como jóvenes menores de 25 años, hombres que tienen sexo con hombres (HSH), trabajadoras/es del sexo, adolescentes y personas que ingresan en instituciones penitenciarias o correccionales. (A-II).*
2. *Se recomienda efectuar cribado de las ITS en pacientes infectados por el VIH en la evaluación inicial y posteriormente con periodicidad anual si son sexualmente activos o más frecuentemente dependiendo de la valoración individual del riesgo (A-II).*
3. *Se recomienda efectuar cribado de ITS en mujeres embarazadas en el 1º trimestre del embarazo y, si resulta negativa, repetirla antes de iniciarse el parto y en el momento del parto según la situación y prácticas de riesgo de la mujer. También debe realizarse en el momento del parto en aquellas mujeres embarazadas que no hayan acudido a controles prenatales, especialmente en mujeres procedentes de países de alta prevalencia (B-II).*
4. *El cribado de ITS incluye realizar serologías y detección de Chlamydia trachomatis, Neisseria gonorrhoeae y Trichomonas vaginalis en todas las localizaciones susceptibles en función del tipo de prácticas sexuales (A-II). El despistaje serológico incluirá inicialmente serología de VIH, lúes, VHB y VHC a todos los pacientes con factores de riesgo y del VHA a HSH o pacientes con prácticas de riesgo para esta infección.*
5. *La periodicidad del cribado dependerá de la valoración individual del riesgo. Los pacientes con serología negativa de VHA y VHB deberán vacunarse frente a ambos virus (A-II).*
6. *Se recomienda efectuar cribado de infección por VPH y descartar carcinoma de cuello uterino en:*
  - a. *mujeres sin infección por VIH en función de la edad:*
    - i. *<21 años no cribado. (A-III).*
    - ii. *21-29 años solo citología cada 3 años. (A-III).*

*iii. 30-65 años co-test (citología y VPH) cada 5 años (opción preferente) o solo citología cada 3 años. (opción aceptable) (A-II).*

*b. mujeres VIH positivas:*

*i. En mujeres y adolescentes con VIH, el cribado del cáncer cervical con citología sola, debe comenzar dentro del año de inicio de la actividad sexual. Si ya son sexualmente activas, dentro del primer año después del diagnóstico de VIH, pero no más tarde de los 21 años de edad. (A-II).*

*ii. <30 años solo citología. Si citología inicial normal repetir al año. Tras 3 citologías consecutivas anuales normales pasar a repetir cada 3 años. (A-II).*

*iii. >30 años citología solo o co-test (prueba VPH y citología). Tras 3 citologías consecutivas anuales normales pasar a repetir cada 3 años. Si un co-test negativo (citología normal y VPH negativo), repetir cribado cada 3 años. (A-II).*

*iv. No suspender el cribado a los 65 años. (A-II).*

*v. En mujeres con  $CD4 < 200$  cel/mm<sup>3</sup>, se realizará revisión anual con citología. (A-II)*

*vi. Las mujeres con VIH que tienen resultados citológicos cervicales de lesiones intraepiteliales escamosas de bajo grado o peor deben ser referidas para colposcopia. (A-II).*

## **2.3. Medidas generales de prevención y control**

### **2.3.1. Educación sanitaria**

Basándose en las evidencias disponibles sobre la eficacia de diferentes intervenciones en la reducción de las ITS, el *U.S. Preventive Services Task Force* recomienda ofrecer consejo de “alta intensidad” a aquellas personas en riesgo de padecer una ITS para disminuir sus conductas de riesgo<sup>3</sup>. Estas intervenciones suponen un tiempo total de al menos 2 horas, algo de difícil alcance en el ámbito clínico si no se consiguen recursos de educación para la salud. En una revisión reciente limitada a intervenciones formativas de una o dos sesiones de 20-30 minutos realizadas en la clínica de forma individual y dirigidas a personas que habían tenido o

estaban en riesgo de tener una ITS, encontraron menores tasas de ITS en el grupo de intervención en 5 de los 13 estudios analizados. Paradójicamente, en uno de ellos, la incidencia de ITS fue mayor en el subgrupo de HSH que recibieron la intervención<sup>22</sup>.

No se dispone de evidencias concluyentes sobre la eficacia del consejo breve para disminuir las conductas de riesgo y la incidencia de las ITS. Esto no significa necesariamente que el consejo no sea eficaz, sino que se precisa investigar más, para lograr intervenciones eficaces. La información sobre el sexo seguro debe de formar parte de todas las consultas de salud sexual y debe incluir:

- a) Mecanismo de transmisión de las ITS.
- b) Riesgo de las diferentes prácticas sexuales (oral, genital, rectal).
- c) Preservativo: eficacia, limitaciones (por ej.: no ofrece protección completa contra el virus herpes simple -VHS- o el VPH) y uso correcto del mismo.
- d) Los pacientes con una ITS deben ser informados sobre el agente causal de la misma y su transmisión, el tratamiento que va a tomar (dosis, duración, posibles efectos secundarios, importancia del cumplimiento y de no compartir la medicación con la pareja), la necesidad de abstenerse de mantener relaciones sexuales hasta la finalización del tratamiento y en su caso hasta que el contacto haya sido estudiado y tratado. Puede ser útil suministrar al paciente información escrita sobre la infección que ha tenido, estos folletos están disponibles en las páginas web de diferentes organizaciones (CDC: [www.cdc.gov/std/](http://www.cdc.gov/std/), IUSTI: [www.iusti.org](http://www.iusti.org)).

Las revisiones citadas previamente<sup>3,22</sup> no incluían estudios limitados a pacientes con el VIH. El estudio observacional prospectivo SUN del CDC<sup>23</sup>, de una cohorte de pacientes con el VIH, mostró que una intervención breve de consejo para disminuir las conductas de riesgo para las ITS junto con un cribado bianual, disminuyó la incidencia de estas infecciones en un 50%.

Los pacientes con infección por el VIH deben ser informados sobre los métodos para reducir el riesgo de transmisión del VIH, sobre los beneficios del cribado de las ITS, que frecuentemente son asintomáticas<sup>1</sup>, y que las ITS pueden aumentar la carga viral y facilitar la transmisión del VIH.

## Recomendación

1. *La información sobre el sexo seguro tiene que formar parte de todas las consultas de salud sexual y debe incluir información sobre formas de transmisión y riesgo de determinadas prácticas sexuales así como de eficacia y limitaciones del preservativo (A-III).*

### 2.3.2. Estudio de contactos

Es el proceso por el cual las parejas sexuales de un paciente diagnosticado de una ITS son identificadas e informadas de su exposición, ofreciéndoles atención y tratamiento por un profesional sanitario (Tabla 3). El estudio de contactos tiene beneficios clínicos y de salud pública por tres razones:

1. Evitar la reinfección del caso índice.
2. Diagnosticar y tratar a personas infectadas que frecuentemente están asintomáticas y que de otro modo no solicitarían atención médica.
3. Romper la cadena de transmisión de la infección a nivel poblacional.

**Tabla 3. Periodos de tiempo, según la ITS o síndrome, para la intervención sobre los contactos y tratamiento epidemiológico**

| Infección/síndrome                                                                                                                                 | Periodos de tiempo recomendados para la notificación a contactos (desde la fecha de inicio de síntomas o, si el caso índice es asintomático, desde la fecha de diagnóstico)                                                                                                                                  | Tratamiento epidemiológico (tratamiento del contacto antes de obtener el resultado del laboratorio) |
|----------------------------------------------------------------------------------------------------------------------------------------------------|--------------------------------------------------------------------------------------------------------------------------------------------------------------------------------------------------------------------------------------------------------------------------------------------------------------|-----------------------------------------------------------------------------------------------------|
| <b><i>Chlamydia trachomatis</i></b><br>(incluido LGV)                                                                                              | Varón con clínica: 1 mes, previo al inicio de los síntomas<br><ul style="list-style-type: none"> <li>Resto de casos índice (varones asintomáticos o con clínica en localización diferente de la uretra; todas las mujeres): 6 meses</li> <li>Se desconoce la duración de portadores asintomáticos</li> </ul> | Si                                                                                                  |
| <b>Gonorrea</b>                                                                                                                                    | <ul style="list-style-type: none"> <li>Varón con clínica: 2 semanas. previo al inicio de los síntomas</li> <li>Resto de casos índice: 3 meses</li> </ul>                                                                                                                                                     | Si                                                                                                  |
| <b>Uretritis inespecífica</b>                                                                                                                      | <ul style="list-style-type: none"> <li>Varón con clínica: 1 mes, previo al inicio de los síntomas</li> </ul>                                                                                                                                                                                                 |                                                                                                     |
| <b>Enfermedad Inflamatoria Pélvica</b>                                                                                                             | <ul style="list-style-type: none"> <li>Intervalos de <i>Chlamydia</i> y gonococo si detectados</li> <li>6 meses</li> </ul>                                                                                                                                                                                   | Si                                                                                                  |
| <b>Orquiepididimitis</b>                                                                                                                           | <ul style="list-style-type: none"> <li>Intervalos de <i>Chlamydia</i> y gonococo si detectados</li> <li>6 meses</li> </ul>                                                                                                                                                                                   | Si                                                                                                  |
| <b>Sífilis precoz:</b> <ul style="list-style-type: none"> <li><b>Primaria</b></li> <li><b>Secundaria</b></li> <li><b>Latente precoz</b></li> </ul> | <ul style="list-style-type: none"> <li>3 meses previos al inicio de la clínica</li> <li>1 año</li> <li>1-2 años</li> </ul> Serología de sífilis en la 1º visita, a las 6 semanas y a los 3 meses del último                                                                                                  | Si, particularmente cuando no se puede garantizar el seguimiento serológico                         |

|                                               |                                                                                                                                                                                                                                                                                                                                              |                                                                                     |
|-----------------------------------------------|----------------------------------------------------------------------------------------------------------------------------------------------------------------------------------------------------------------------------------------------------------------------------------------------------------------------------------------------|-------------------------------------------------------------------------------------|
|                                               | contacto sexual con el caso índice                                                                                                                                                                                                                                                                                                           |                                                                                     |
| <b>Sífilis latente tardía o indeterminada</b> | Hasta la fecha de la última serología negativa si está disponible; en caso contrario, retroceder en la vida sexual activa del caso índice tanto como sea posible<br><br>En pacientes nacidos en países donde el control del embarazo pueda ser deficiente, considerar evaluar a las madres si existe la posibilidad de una sífilis congénita | No                                                                                  |
| <b>Herpes genital</b>                         | No hay un periodo específico<br><br>No hay recomendaciones específicas para el estudio de contactos, salvo que la pareja tenga síntomas                                                                                                                                                                                                      | Si el caso índice lo desea, ver a la pareja actual para informarle y aconsejarle    |
| <b>Molluscum</b>                              | No necesaria la evaluación de contactos.                                                                                                                                                                                                                                                                                                     |                                                                                     |
| <b><i>Trichomonas vaginalis</i></b>           | 1 mes (en la mayoría de los varones la infección se resuelve espontáneamente en 2 semanas)                                                                                                                                                                                                                                                   | Si                                                                                  |
| <b>Escabiosis</b>                             | 2 meses, previos al inicio de los síntomas                                                                                                                                                                                                                                                                                                   | Si, contactos sexuales y no sexuales (casa, compartir ropa)                         |
| <b>Pediculosis pubis</b>                      | 3 meses previos al inicio de la clínica                                                                                                                                                                                                                                                                                                      | Si, solo contactos sexuales                                                         |
| <b>Hepatitis A</b>                            | 2 semanas previas - 1 semana después del inicio de la ictericia                                                                                                                                                                                                                                                                              | No. Los contactos no vacunados o no inmunes pueden beneficiarse de PPE <sup>1</sup> |
| <b>Hepatitis B</b>                            | 2 semanas previas al inicio de la ictericia - AgHBs(-)                                                                                                                                                                                                                                                                                       | No. Los contactos no vacunados o no inmunes pueden beneficiarse de PPE <sup>1</sup> |
| <b>Hepatitis C</b>                            | 2 semanas previas al inicio de la ictericia.                                                                                                                                                                                                                                                                                                 | No                                                                                  |

|            |                                                                                                                                                                                                                                                                                                                                                       |                                                                                 |
|------------|-------------------------------------------------------------------------------------------------------------------------------------------------------------------------------------------------------------------------------------------------------------------------------------------------------------------------------------------------------|---------------------------------------------------------------------------------|
|            | <p>Transmisión HTS rara.</p> <p>Transmisión sexual mayor en HSH, especialmente si VIH (+) / sexo anal / sexo traumático / ITS rectal concurrente</p>                                                                                                                                                                                                  |                                                                                 |
| <b>VPH</b> | <p>No hay un periodo específico</p> <p>No hay recomendaciones específicas para el estudio de contactos</p>                                                                                                                                                                                                                                            | Si el caso índice lo desea ver a la pareja actual para examinarle e informarle. |
| <b>VIH</b> | <p>Si se puede estimar la fecha probable de la infección, estudiar a todos los contactos a partir de la misma y en los 3 meses previos.</p> <p>Si esto no es posible, retroceder hasta la fecha de la última serología negativa si está disponible; en caso contrario, retroceder en la vida sexual activa del caso índice tanto como sea posible</p> | Profilaxis post-exposición cuando esté indicada <sup>24</sup> .                 |

Adaptado de *Sexually Transmitted Infections in Primary Care 2013(RCGP/BASHH)* by Lazaro N. Available at [www.rcgp.org/guidelines](http://www.rcgp.org/guidelines)<sup>22</sup>  
y de *2015 European guidelines for the management of partners of persons with sexually transmitted diseases*<sup>23</sup>

Existen tres modalidades básicas de notificación de contactos: por el paciente o *“patient referral”* cuando la notificación la hace el caso índice; *“provider referral”* cuando la realiza un profesional sanitario y *“contract referral”* en la cual el paciente se hace cargo de la notificación, pero si pasado un tiempo no lo ha hecho ésta pasa a manos del profesional sanitario. El *“patient referral”* se puede reforzar suministrándole información escrita sobre la infección para que entregue a los contactos. En algunos países se utiliza la *“expedited partner therapy”* o *“delivered partner therapy”*, en la que se dispensa medicación al caso índice para que la suministre a sus contactos. Esta modalidad solo se aplica en las infecciones por gonorrea, Chlamydia y Trichomonas, cuando no es posible examinar a los contactos. Sus principales problemas son la falta de control de posibles efectos adversos y la posible aparición de resistencias por un uso inadecuado.

Se carece de evidencias definitivas sobre cuál es la modalidad más efectiva para las diferentes ITS<sup>27</sup>. En España son escasas las recomendaciones y directrices oficiales sobre cómo realizar los estudios de contactos y cuando se realiza se utiliza la modalidad de *“patient referral”*. Un reciente estudio realizado en Barcelona sobre la notificación de contactos en pacientes con VIH, que combinaba las estrategias de *“patient referral”* y *“provider referral”* realizada por profesionales de salud pública, encontró una elevada aceptabilidad por los usuarios y efectividad en la detección de nuevos diagnósticos VIH<sup>28</sup>.

### **Recomendaciones**

1. *El estudio de contactos debería hacerse a la mayor brevedad posible con el objeto de minimizar las reinfecciones e impedir la progresión de la enfermedad en las parejas infectadas. Además de las pruebas apropiadas para el diagnóstico de la infección a la que ha sido expuesto, deben descartarse otras ITS (A-III).*
2. *La elección del método dependerá de la disponibilidad de recursos y de la aceptabilidad por parte del paciente y sus contactos. Si es posible se recomienda la estrategia “contract referral”; y si no lo fuera, como mínimo se recomienda la estrategia “patient referral” reforzada suministrando al paciente material escrito (A-III).*

### **2.3.3. Vacunación**

La prevención de las ITS mediante vacunación está limitada a las vacunas de hepatitis A y B y el VPH. Se recomienda la vacunación frente a la hepatitis A y B en los HSH, en usuarios

de drogas por vía parenteral y personas con hepatopatías crónicas; además, la vacunación frente a la hepatitis B está recomendada a todos aquellos no vacunados que tienen un mayor riesgo de infección<sup>1</sup>. Así mismo, se recomienda la vacunación en pacientes infectados por el VIH si no se han vacunado con anterioridad<sup>32</sup>.

En pacientes con infección por el VIH las vacunas disponibles frente al VHA y VHB son menos eficaces que en población general. La respuesta es mejor en pacientes con cifras altas de linfocitos CD4, y baja carga viral, por lo que se aconseja administrarlas cuando la CV sea indetectable y la cifra de linfocitos CD4 > 200 células/mm. Para el VHA se recomiendan dos dosis con un intervalo de 6-18 meses y medir los títulos de anticuerpos al mes de la última dosis. La eficacia de la vacuna puede aumentarse administrando una tercera dosis. Respecto a la vacuna frente a VHB, se aconseja la administración de cuatro dosis de 40 µg (meses 0, 1, 2 y 6) ya que mejora de forma significativa la respuesta serológica<sup>24,30</sup>. (*Ver Documento de Consenso sobre profilaxis postexposición ocupacional y no ocupacional respecto al VIH, VHB y VHC*<sup>24</sup>, disponible en:

[http://www.msssi.gob.es/ciudadanos/enfLesiones/enfTransmisibles/sida/publicaciones/profSanitarios/PPE\\_23Marzo2015.pdf](http://www.msssi.gob.es/ciudadanos/enfLesiones/enfTransmisibles/sida/publicaciones/profSanitarios/PPE_23Marzo2015.pdf) )

No es necesario hacer serología post-vacunación frente a la hepatitis A, excepto en pacientes con el VIH según se ha comentado anteriormente. Para la vacunación de la hepatitis B, se recomienda hacer serología 1-2 meses tras la última dosis en personal sanitario o trabajadores en riesgo de exposición, pacientes con VIH e inmunodeprimidos y parejas sexuales de personas AgHBs y si los anti-HBs <10 mIU/ml se recomienda revacunar.

Respecto al VPH ver capítulo 6 de este documento.

### **Recomendaciones**

1. *Es necesario conocer la historia de vacunación del paciente para ofertar la vacunación en aquellos que lo precisen siguiendo el calendario de vacunación vigente (A-III).*
2. *En pacientes con infección por el VIH, la vacunación frente al VHA y VHB está indicada en todos los susceptibles (antiHBs y antiHBc negativos) con carga viral del VIH indetectable y linfocitos CD4 >200 células/mm<sup>3</sup> (A-I).*
3. *La vacunación para el VHA requiere 2 dosis con 6-18 meses de intervalo (A-I). Se aconseja administrar una tercera dosis si no hay producción de anticuerpos al mes de la segunda dosis (B-II).*

4. *En pacientes con infección por el VIH, se recomienda administrar cuatro dosis dobles de vacuna para el VHB (40 µg) los meses 0, 1, 2 y 6) (A-I).*

### 2.3.4. Vigilancia epidemiológica

En España, hasta la fecha, la infección gonocócica, sífilis, sífilis congénita y la hepatitis B eran de declaración obligatoria a nivel nacional ante su simple sospecha, de forma numérica; de los casos de hepatitis B y sífilis congénita, se recogía además, información ampliada. En cuanto a las características de la notificación del VIH, la legislación al respecto señala la necesidad de notificar todos los nuevos diagnósticos de VIH y casos de sida con un conjunto mínimo de variables. En marzo de 2015 se publicó una modificación de las enfermedades sometidas a vigilancia y de las modalidades de declaración<sup>31</sup>, que afecta a las ITS en varios sentidos: a) se amplían las ITS a vigilar incluyendo, además de la sífilis, sífilis congénita y gonococia, la infección por *Chlamydia trachomatis* y el linfogranuloma venéreo; b) todas ellas pasan a ser de declaración individualizada con un conjunto mínimo de variables a recoger establecido en los nuevos protocolos de vigilancia epidemiológica; c) se ha incluido el epígrafe de transmisión sexual en otras patologías en las que este mecanismo de transmisión puede estar involucrado aunque no sea el modo principal; y d) se unifica la notificación de nuevos diagnósticos del VIH, sida y muerte<sup>32</sup>. En el momento actual, estos cambios están en fase de implementación en las CCAA.

## 3. VALORACIÓN DEL PACIENTE

### 3.1. Anamnesis

#### 3.1.1. Consideraciones generales

La anamnesis inicial es una herramienta fundamental en la valoración de una persona que acude para el diagnóstico o cribado de ITS. Esta anamnesis es necesaria para evaluar el riesgo de cada paciente, orientar las pruebas diagnósticas y establecer un consejo preventivo individualizado. Se debe caracterizar por ser completa y detallada respetando la intimidad de la persona, para lo que es recomendable utilizar un cuestionario estructurado, para ello se recomienda:

- a) Crear un ambiente propicio, explicando la justificación de las preguntas, y hacerlas con naturalidad.

- b) Las preguntas deben ser abiertas y concisas a la vez: “¿tienes alguna forma de protegerte frente a ITS?”
- c) Ser informativo y formativo, de forma que se aproveche la misma para explicar a las personas los riesgos que comportan diferentes prácticas sexuales y las medidas de prevención en relación con las mismas.
- d) Posibilidad de ofrecer a los pacientes la presencia de un traductor en el caso de existir barrera idiomática, siendo recomendable la presencia de otro profesional sanitario en la exploración íntima así como la elección del sexo del médico que le va a atender siempre que sea posible.

### **3.1.2. Valoración de riesgo**

Se remite al lector al apartado 2.1

### **3.1.3. Anamnesis de sintomatología específica (en caso de que ese sea el motivo)**

Deberá cubrir la semiología de las diferentes ITS, preguntando por el inicio de los síntomas y el tiempo transcurrido desde las relaciones no protegidas y el inicio de los mismos<sup>1,8,33,34</sup>.

Lo más habitual es repasar la clínica por “aparatos” con especial atención a piel, mucosas y faneras:

- a) Generales: fiebre, malestar, pérdida de peso, artralgias/artritis, cefalea, alteraciones visuales/auditivas o sensitivas.
- b) Orofaringe: odinofagia, exudados y lesiones que haya podido observar.
- c) Piel/faneras: cualquier forma de exantema con sus síntomas (incluyendo palmas y plantas). Lesiones actuales o pasadas que se hayan podido autolimitar
- d) Genital:
  - Hombre: presencia de secreción y sus características, prurito o dolor miccional, lesiones mucosas y su evolución desde el inicio de las mismas, dolor/tumefacción testicular.
  - Mujer: presencia de descarga vaginal y características, presencia de dispareunia, fecha de la última regla, alteraciones menstruales (dismenorrea o sangrado intercoital), o dolor pélvico o abdominal bajo.

- e) Anal: dolor, ritmo deposicional, dolor con las deposiciones, supuración/ descarga y características de las mismas, hematoquecia.

### **3.2. Exploración física**

La exploración física deberá igualmente ser completa dado que algunas ITS, especialmente la sífilis en su forma secundaria, pueden tener manifestaciones en diferentes regiones anatómicas.

La exploración revisará:

- a) Cabeza y cuello: zonas de alopecia, cuando se sospeche lúes secundaria.
- b) Oftalmológica (incluido un fondo de ojo en pacientes sintomáticos): descartar conjuntivitis, queratitis, uveítis y patología retiniana, si hay sintomatología o dependiendo de la patología diagnosticada.
- c) Orofaringea: presencia de verrugas, leucoplasia oral vellosa, candidiasis oral, lesiones ulcerativas, sarcoma de Kaposi u otras lesiones orolinguales.
- d) Adenopatías loco-regionales.
- e) Genitales:
  - Observar presencia en genitales externos tanto en hombres como mujeres de lesiones cutáneas y/o mucosas como pueden ser eritema, eczema, vesículas, úlceras, costras o verrugas
  - -En el varón: Evaluar las características de la secreción uretral: purulenta, hemorrágica, mucosa y signos de meatitis. Palpación de los testículos y epidídimo, apreciándose tamaño, morfología y sensibilidad.
  - -En la mujer una vez observada la vulva y mediante especulo introducido sin lubricante se observará las características del flujo vaginal y el estado de la mucosa cervical con la toma oportuna de muestras. Se realizará la exploración pélvica bimanual en aquellas mujeres con síntomas genitales o dolor abdominal bajo.
- f) Ano y región perianal:
  - Valoración externa de la zona perianal buscando lesiones sospechosas de VPH, herpes, lúes o clamidia (LGV).

- Valoración interna: si hay antecedentes de relaciones anales y/o datos clínicos sugestivos de patología, se realizará un tacto rectal en el que se tendrá en cuenta la sensibilidad al mismo, la presencia de lesiones palpables (consistencia y sensibilidad de las mismas) y el aspecto de la secreción si existiera. Mediante espéculo anal con lámpara de luz fría se valorará las lesiones de la mucosa rectal y se realizará la toma de muestras oportuna. En personas inmunodeprimidas -especialmente en HSH con infección por el VIH- se recomienda realizar una toma de citología anal y remitir a Unidades que cuenten con programas de prevención de cáncer de anal o a consultas de proctología, a todos aquellos que no tengan un estudio citológico estrictamente normal. (Ver capítulo 6, Infección por el virus del papiloma humano).

g) Piel: se buscarán fundamentalmente lesiones de un posible secundarismo luético, máculas y pápulas, sin olvidar la exploración de las palmas de las manos y plantas de los pies; y las zonas de alopecia.

h) Articulaciones: artritis (mono o pauci-articular).

Considerar la posibilidad de remitir a los pacientes al urólogo, ginecólogo o proctólogo en caso que se considere oportuno o indicado.

### **3.3. Recogida y transporte de muestras**

La recogida y transporte de las muestras es un factor clave en el rendimiento de las técnicas microbiológicas. Especialmente para realizar un cultivo las muestras han de recogerse: antes de instaurar tratamiento antimicrobiano, de lesiones activas, evitando el contacto con desinfectantes y microbiota comensal, con volumen suficiente y en el contenedor adecuado convenientemente identificado. Deben ser transportadas sin demora y almacenadas en las condiciones de temperatura adecuadas a cada caso. Los microorganismos implicados en las ITS suelen ser fastidiosos, por lo que las técnicas que detectan organismos viables pueden dar resultados falsos negativos si no se siguen de forma estrictas las normas de recogida de muestras. Cuando se realizan técnicas de amplificación de ácidos nucleicos (AANN), las condiciones de recogida, transporte y almacenamiento son menos estrictas. Para mayor detalle pueden consultarse las recomendaciones publicadas por la SEIMC<sup>35</sup>.

El tipo de muestra a recoger dependerá de la edad, sexo, prácticas sexuales y manifestaciones clínicas del paciente. Cada laboratorio puede emplear sistemas de torundas y contenedores específicos que dependen del tipo de muestra, el tipo de determinación que se va a realizar y del fabricante. En muchos casos se recogerán varias muestras para

diferentes técnicas (microscopía, cultivo, biología molecular). Cada una de las tomas debe de realizarse sobre un segmento previamente no muestreado, rotando la torunda durante unos segundos. La Tabla 4 explica la recogida de los diferentes tipos de muestras<sup>7</sup>.

**Tabla 4. Recogida de muestras para el diagnóstico de ITS**

| Muestra                 | Preparación                                                                 | Tipo, volumen                                                                                                       | Recipiente                                                                                                                        | Comentario                                                                                          |
|-------------------------|-----------------------------------------------------------------------------|---------------------------------------------------------------------------------------------------------------------|-----------------------------------------------------------------------------------------------------------------------------------|-----------------------------------------------------------------------------------------------------|
| <b>Anal/rectal</b>      | Canal anal libre de heces                                                   | Introducir la torunda después del esfínter anal, rotar durante 10-30 segundos (si hay contaminación fecal, repetir) | Cultivo gonococo: torundas de Dacron o rayon con medio de transporte tipo <i>Stuart-Amies</i> .<br><br>AANN: torundas específicas | En HSH y VIH positivos con diarrea investigar patógenos entéricos.                                  |
| <b>Cérvix</b>           | Previamente limpiar las secreciones vaginales y moco. Espéculo no lubricado | Insertar la torunda 2–3 cm en el canal cervical y rotar durante 5–10 segundos.                                      | Cultivo gonococo: torundas de Dacron o rayon con medio de transporte tipo <i>Stuart-Amies</i> .<br><br>AANN: torundas específicas | No en prepuberales (tomar muestra del vestíbulo vaginal) ni en histerectomizadas (orina o vaginal). |
| <b>Faringe</b>          | Depresor y torunda                                                          | Torunda. Frotar las amígdalas y faringe posterior                                                                   | Torunda específica para AANN                                                                                                      | No contaminar con microbiota de mucosas y lengua                                                    |
| <b>Lesión (sífilis)</b> | Empapar con solución salina estéril                                         | Preparar varios portas o aspirar líquido en un tubo capilar                                                         | Porta y cubre o tubo capilar                                                                                                      | Microscopía de campo oscuro. AANN de <i>T. pallidum</i>                                             |
| <b>Úlcera</b>           | Evitar aplicación previa de antisépticos                                    | Si vesícula, aspirar con jeringa. En la base, frotar vigorosamente con la torunda (sin hacer sangrar).              | Medio transporte de virus. Torunda específica para AANN.                                                                          | Tomar de lesiones nuevas, evitar lesiones crónicas                                                  |
| <b>Suero</b>            | Descontaminación piel                                                       | 5 ml sangre                                                                                                         | Tubo con gelosa.                                                                                                                  | Serología de sífilis y VIH a todo paciente con sospecha de ITS                                      |
| <b>Uretra</b>           | Limpiar con gasa estéril o torunda en mujeres. No orinar en la hora previa. | Si hay secreción, o aparece a la presión, recoger en la torunda. Si no, insertar 2-3 cm una                         | Cultivo gonococo: torundas de Dacron o rayon con medio de transporte tipo <i>Stuart-</i>                                          | En mujeres estimular la secreción mediante masaje de la uretra contra la sínfisis del               |

|                                                        |                                                                                |                                                                                |                                                                                                                                         |                                                                           |
|--------------------------------------------------------|--------------------------------------------------------------------------------|--------------------------------------------------------------------------------|-----------------------------------------------------------------------------------------------------------------------------------------|---------------------------------------------------------------------------|
|                                                        |                                                                                | torunda fina y rotar 5-10 segundos.                                            | <i>Amies</i> .<br>AANN: torundas específicas.                                                                                           | pubis a través de la vagina.                                              |
| <b>Vagina</b>                                          | Espéculo sin lubricante. En cribado puede hacer toma ciega la propia paciente. | Torunda recogiendo secreción. Si no hay, frotar la pared posterior 5 segundos. | Torundas con medio de transporte tipo <i>Stuart-Amies</i> .<br>AANN: torundas específicas.                                              | Levaduras, Tricomonas, vaginosis. AANN de gonococo y Clamidia en cribado. |
| <b>Vulva (incluye labios y glándulas de Bartolino)</b> | Preparar piel con solución de NaCl 0,85% (no utilizar alcohol en mucosas)      | Torunda o aspirado (absceso de la glándula de Bartolino)                       | Torunda Dacron o rayon con medio transporte tipo Stuart-Amies. Si úlceras, medio de transporte de virus o torunda específica para AANN: |                                                                           |
| <b>Orina</b>                                           | Mínimo una hora desde micción previa                                           | 10-15 ml orina chorro inicial                                                  | Frasco estéril tapón de rosca                                                                                                           | Para uso en técnicas de AANN                                              |

Cuando se va a realizar cultivo, la inoculación de las muestras en los medios correspondientes en la misma consulta favorece la viabilidad de los microorganismos y mejora la sensibilidad. Si esto no es posible, las muestras deben recogerse siempre empleando medios de transporte.

En situaciones de cribado, la elevada sensibilidad de las técnicas de AANN permite la recogida por el propio paciente de muestras poco invasivas<sup>36,37</sup> (orina, exudado vaginal, exudado faríngeo y rectal), reduciendo las molestias y evitando el rechazo a la realización de la prueba. Estas técnicas también posibilitan la detección de agentes causantes de ITS en muestras extragenitales, en las cuales las técnicas convencionales poseen un bajo rendimiento diagnóstico.

### **Recomendaciones**

- 1. Se recomienda dirigir la anamnesis a la búsqueda de sintomatología aguda. Deberá cubrir la semiología de las diferentes ITS, preguntando por el inicio de los síntomas y el tiempo transcurrido desde las relaciones no protegidas y el inicio de los mismos (A-II).*
- 2. Se recomienda que la exploración física sea completa dado que algunas ITS, especialmente la sífilis en su forma secundaria, pueden tener manifestaciones en diferentes regiones anatómicas (B-III).*
- 3. Se recomienda ofrecer a los pacientes la presencia de un traductor en el caso de existir barrera idiomática, la presencia de otro profesional sanitario en la exploración íntima así como la elección del sexo del médico que le va a atender siempre que sea posible (B-III).*
- 4. Se recomienda evitar los lubricantes en las tomas de muestras vaginales por ser tóxicos para el gonococo (A-II).*
- 5. El empleo de técnicas de AANN para cribado, permite la autorrecogida del exudado vaginal en mujeres y orina en varones, por lo que es la técnica recomendada cuando la recogida la realiza el propio paciente, (A-I).*

## 4. DIAGNÓSTICO Y TRATAMIENTO DE LOS PRINCIPALES SÍNDROMES

### 4.1. Uretritis y cervicitis

Las ITS son la causa más frecuente de uretritis y cervicitis de origen infeccioso. Es frecuente la coinfección de varios agentes, estando principalmente implicados *Neisseria gonorrhoeae* y *Chlamydia trachomatis*. Otros microorganismos serían *Mycoplasma genitalium* (con un interés creciente)<sup>46,47</sup> *Trichomonas vaginalis*, Adenovirus o VHS. Últimos metaanálisis relacionan también *Ureaplasma urealyticum* con la uretritis aguda a pesar de encontrarse de forma colonizadora en el 30-40% de individuos sanos sexualmente activos junto con otras especies de *Mycoplasma*<sup>1,42</sup>.

Respecto a la clínica, las uretritis se caracterizan por inflamación uretral, cursando con disuria, disconfort y secreción uretral mucosa, mucopurulenta o purulenta como síntomas más frecuentes, existiendo también casos asintomáticos. El origen no gonocócico de la infección cursará habitualmente con clínica menos florida. Las cervicitis en cambio, serán frecuentemente asintomáticas, siendo sus principales signos el exudado cervical mucopurulento o el sangrado cervical durante la recogida de muestras o relaciones sexuales.

El diagnóstico se establecerá ante clínica y exploración física compatible, técnicas de detección de ácidos nucleicos (de elección PCR a tiempo real) y/o cultivo de los diferentes agentes en exudado uretral/cervical, especialmente importante en el caso del gonococo previo a tratamiento para confirmar positividad de la PCR, realización de antibiograma y estudio de sensibilidades antibióticas<sup>39,40,44</sup>. En el caso de la uretritis, el resultado del Gram será diagnóstico ante la presencia de 5 ó más leucocitos/campo<sup>45</sup> pudiéndose iniciar tratamiento dirigido ante uretritis gonocócica con la simple visualización de diplococos Gram negativos.

El tratamiento (tabla 5) debe ser iniciado en el momento de diagnóstico de la patología si el Gram fuera concluyente, sin esperar a los resultados microbiológicos. El tratamiento sintomático se aconseja en la primera visita en pacientes en los que no se pueda asegurar el seguimiento.

Las crecientes resistencias a cefalosporinas descritas en el gonococo en los últimos años (en España más del 5% de aislados fueron resistentes a cefixima en 2013<sup>39</sup>) y los fallos de tratamiento detectados, han derivado en la recomendación de tratamiento dual como de elección ante las infecciones gonocócicas no complicadas. En el caso de la cervicitis o uretritis no gonocócica (UNG), la doxiciclina pasa a ser el régimen de elección<sup>44,45</sup>.

Ante clínica uretral persistente o recurrente (30 -90 días tras episodio agudo), y descartada reinfección, estudios han demostrado que *M. genitalium*, *C.trachomatis* y *T. vaginalis* (en áreas de alta prevalencia) son los agentes más relacionados. El tratamiento en estos casos únicamente estará aconsejado ante síntomas o signos definitorios de uretritis y Gram positivo en exudado uretral<sup>44</sup>.

Se aconseja la entrevista clínica a las 3 semanas para control de resolución de los síntomas. La realización de un test de curación de 3 a 6 semanas post tratamiento estaría especialmente indicado si el paciente persiste sintomático, no se hubiera tratado con el régimen de elección, se aislara *M. genitalium*, o el cumplimiento terapéutico fuera dudoso <sup>44,45</sup>. Se aconseja realizar test de control a los 3 meses por las elevadas tasas de reinfección. Las parejas sexuales del paciente de los 2 meses previos deberán ser evaluadas y tratadas con el mismo régimen que el paciente, aconsejándose abstinencia sexual hasta la finalización del tratamiento y desaparición de los síntomas.

**Tabla 5. Recomendaciones terapéuticas de las uretritis y las cervicitis<sup>40,44,45</sup>**

|                                                        | <b>De elección:</b>                                                                                                                                                                                                                                                                                                                                 | <b>Alternativo</b>                                                                                                                                                                                                                                                                | <b>Alergia a penicilinas:</b>                     |
|--------------------------------------------------------|-----------------------------------------------------------------------------------------------------------------------------------------------------------------------------------------------------------------------------------------------------------------------------------------------------------------------------------------------------|-----------------------------------------------------------------------------------------------------------------------------------------------------------------------------------------------------------------------------------------------------------------------------------|---------------------------------------------------|
| <b>Uretritis /cervicitis gonocócica no complicadas</b> | Ceftriaxona 500 mg IM MD + Azitromicina 1 gr vo MD                                                                                                                                                                                                                                                                                                  | -Si no se dispone de cefalosporinas IM:<br>Cefixima 400 mg vo MD + Azitromicina 2 gr vo MD<br>-Si fallo de tratamiento o resistencias detectadas a cefalosporinas:<br>Ceftriaxona 1 gr IM MD + Azitromicina 2 gr vo MD<br>ó<br>Gentamicina 240 mg IM MD + Azitromicina 2 gr vo MD | Gentamicina 240mg IM MD + Azitromicina 2 gr vo MD |
| <b>Uretritis/cervicitis no gonocócica</b>              | Doxiciclina 100 mg /12h 7 días vo                                                                                                                                                                                                                                                                                                                   | - Azitromicina 1 gr vo MD<br>-Si se aislara <i>M. genitalium</i> :<br>Aзитromicina 500 mg vo MD + 250 mg/ 24 h 4 días                                                                                                                                                             |                                                   |
| <b>Uretritis persistente/ recurrente</b>               | - Si se prescribió en un primer momento doxiciclina:<br>Aзитromicina 500 mg MD + 250 mg/ 24h vo 4 días<br>- Si se prescribió en un primer momento azitromicina:<br>Moxifloxacino 400 mg/24h vo 7-14 días<br>-Si se trata de pacientes heterosexuales, añadir en ambos casos Metronidazol 400 mg/12h vo 5 días para cobertura de <i>T. vaginalis</i> | -Si se aislara <i>M. genitalium</i> resistente a azitromicina:<br>Moxifloxacino 400 mg/12h 7-14 días vo                                                                                                                                                                           |                                                   |

MD. Monodosis. vo vía oral

Se habrá de descartar prostatitis o EIP como complicaciones asociadas en casos crónicos, aconsejándose la derivación al especialista correspondiente.

### Recomendaciones

1. Se recomienda iniciar tratamiento sintromico en la primera visita en pacientes en los que no se pueda asegurar el seguimiento **(C-III)**.
2. En el caso de infección por gonococo y debido a la creciente resistencia a cefalosporinas y los fallos de tratamiento detectados, se recomienda el tratamiento dual como elección ante las infecciones gonocócicas no complicadas **(B-II)**. En el caso de la cervicitis o UNG, la doxiciclina pasa a ser el régimen de elección **(A-II)**. Ante el aislamiento de *Mycoplasma genitalium* se aconseja pauta prolongada de azitromicina o moxifloxacino **(B-II)**.
3. Las parejas sexuales del paciente de los 2 meses previos deberán ser evaluadas y tratadas con el mismo régimen que el paciente, aconsejándose abstinencia sexual hasta la finalización del tratamiento y desaparición de los síntomas **(C-III)**.

### 4.2. Proctitis, Colitis y Enteritis

Definimos la proctitis como la inflamación del recto, proctocolitis recto / colon y enteritis inflamación del intestino delgado. Procesos inflamatorios, sobre todo agudos, provocados por patógenos que se pueden transmitir cuando se practica sexo anal receptivo o fisting en proctitis y proctocolitis o sexo oro-anal en la enteritis.

Entre los **agentes etiológicos**<sup>48</sup> destacamos:

| Proctitis                                                                                                                                                                                                                                      | Proctocolitis                                                                                                                                                                                                                                                                                                 | Enteritis                                                                                                                                        |
|------------------------------------------------------------------------------------------------------------------------------------------------------------------------------------------------------------------------------------------------|---------------------------------------------------------------------------------------------------------------------------------------------------------------------------------------------------------------------------------------------------------------------------------------------------------------|--------------------------------------------------------------------------------------------------------------------------------------------------|
| <ul style="list-style-type: none"> <li>• <i>Neisseria gonorrhoeae</i> (NG)</li> <li>• <i>Chlamydia trachomatis</i> (CT) genotipo D-K, L1-L3 (LGV)</li> <li>• <i>Virus herpes simple I y II</i></li> <li>• <i>Treponema pallidum</i></li> </ul> | <ul style="list-style-type: none"> <li>• <i>Shigella spp</i></li> <li>• <i>Campylobacter jejuni</i></li> <li>• <i>Salmonella spp</i></li> <li>• <i>Clostridium difficile</i></li> <li>• <i>Entamoeba histolytica</i></li> <li>• <i>Cryptosporidium spp</i></li> <li>• <i>Citomegalovirus</i> (CMV)</li> </ul> | <ul style="list-style-type: none"> <li>• <i>Giardia lamblia</i></li> <li>• <i>Cryptosporidium spp</i></li> <li>• <i>Microsporidia</i></li> </ul> |

## 4.2.1. Diagnóstico Clínico

### 4.2.1.1. Proctitis

Hay que destacar el elevado porcentaje de proctitis provocadas por NG y CT que no presentan síntomas ni signos clínicos, a excepción de la proctitis por CT (L1-L3) asociado a linfogranuloma venéreo (LGV) rectal que se presenta clínicamente como una proctitis aguda muy sintomática (que puede progresar a proctocolitis), en la mayoría de los casos, aunque en ocasiones también puede ser asintomática. Es difícil por ello establecer los periodos de incubación.

El paciente puede no presentar síntomas hasta referir síntomas de proctitis aguda como son:

- dolor anorrectal.
- tenesmo rectal.
- secreción rectal mucosa/ purulenta y/o sanguinolenta-
- en ocasiones fiebre y/o malestar general (MEG).
- Signos clínicos, la exploración clínica confirma los signos de proctitis aguda:
  - Presencia de **ulcera o úlceras** en región perianal o canal anal sugestivas de:
    - LGV, suele ser única, no dolorosa y no indurada. Puede pasar desapercibida ya que remite de modo espontáneo.
    - Sífilis, el chancro puede ser único o múltiple, indurado, no doloroso
    - Infección por virus herpes simple, vesículas o úlceras agrupadas
  - **edema y eritema** de mucosa rectal,
  - **secreción** rectal muco purulenta y/o sanguinolenta.

### 4.2.1.2. Proctocolitis

La proctocolitis se presenta como un cuadro de diarrea sanguinolenta, dolor abdominal, acompañado de fiebre y malestar general. Con signos clínicos igual que la proctitis pero que afectan al colon (hasta la unión recto sigmoidea).

### 4.2.1.3. Enteritis

La enteritis se caracteriza por náuseas y vómitos, diarrea, distensión abdominal, flatulencia, pérdida de peso y fiebre. A la exploración, la mucosa rectal no presenta signos inflamatorios.

#### 4.2.2. Diagnóstico microbiológico

La mayoría de las infecciones rectales por NG o CT son asintomáticas, es aconsejable realizar exudado rectal para su estudio aunque el paciente no presente síntomas, si practica sexo anal receptivo.

Para el diagnóstico microbiológico, la recomendación es utilizar técnicas de AANN, para NG, CT, CT/LGV, VHS también se puede utilizar para el diagnóstico de úlcera luética. Solicitar además estudio parasitológico y bacteriológico en heces.

La toma de muestras para exudado rectal debe hacerse convenientemente, mediante exploración dirigida con proctoscopio con lámpara de luz fría, observando así los signos clínicos sugerentes de proctitis aguda, lo que permite indicar un tratamiento empírico si es necesario, como es el caso de LGV rectal, evitando así secuelas de su cronificación como estenosis y fistulas colorrectales

#### 4.2.3. Tratamiento

##### ***Tratamiento sintomático:***

##### **a) Proctitis:**

En pacientes con síntomas y signos de proctitis aguda o en ausencia de resultados microbiológicos se debe realizar un tratamiento empírico<sup>1,48</sup>:

- Doxiciclina 100 mg 1 comprimido cada 12 horas durante 7 días.
- Ceftriaxona 500 mg IM una dosis.

En caso de sospecha de:

- VHS: indicar además valaciclovir 500 mg cada 12 horas de 5-10 días.
- Sífilis: indicar también Penicilina Benzatina 2.400.000 U una dosis IM.

##### **b) Proctocolitis:**

En pacientes con síntomas de proctocolitis y que han viajado recientemente a zonas geográficas prevalentes de amebiasis (o que hayan mantenido relaciones sexuales con personas procedentes de esta zonas) se puede indicar el tratamiento con:

- Metronidazol 500-750 mg/cada 8 horas entre 7-10 días

##### **c) Enteritis por *Giardia lamblia*:**

- Tinidazol 2 gr vía oral monodosis o Metronidazol 250 mg cada 8 horas durante 5 días.

En los pacientes que presentan proctitis es muy importante realizar un despistaje de otras ITS, ya que con frecuencia presentan otras concomitantes. En el caso del LGV, los pacientes diagnosticados de proctitis por CT/L2, son HSH, con una alta prevalencia de infección por VIH y que presentan con frecuencia sífilis y proctitis por NG de manera concomitante<sup>51</sup>. Además es necesario realizar estudio de contactos sexuales.

**Tratamiento específico:**

| PROCTITIS                           | Recomendado                                                                                   | Alternativo                                                                               | Alternativo                                                                    | Alternativo                                                                                        | Gestación                                                                     |
|-------------------------------------|-----------------------------------------------------------------------------------------------|-------------------------------------------------------------------------------------------|--------------------------------------------------------------------------------|----------------------------------------------------------------------------------------------------|-------------------------------------------------------------------------------|
| <i>Neisseria gonorrhoeae</i>        | Ceftriaxona 500 mg IM<br>+<br>Azitromicina 2 gr dosis única oral <sup>49</sup>                | Cefixima 400 mg dosis única oral<br>+<br>Azitromicina 2 gr dosis única oral <sup>49</sup> | Gentamicina 240 mg IM<br>+<br>Azitromicina 2 gr dosis única oral <sup>50</sup> | Gemifloxacino 320 mg dosis única oral (*)<br>+<br>Azitromicina 2 gr dosis única oral <sup>50</sup> | Ceftriaxona 250 mg IM<br>+<br>Azitromicina 1 gr dosis única oral <sup>1</sup> |
| <i>Chlamydia trachomatis</i>        | Doxiciclina 100 mg / 12 horas vo durante 7 días <sup>51</sup>                                 | Azitromicina 1 gr dosis oral única <sup>51</sup>                                          | Levofloxacino 500 mg / día durante 7 días <sup>1</sup>                         | Eritromicina 500 mg / 6 horas durante 7 días <sup>1</sup>                                          | Azitromicina 1 gr dosis única oral <sup>51</sup>                              |
| Linfogranuloma venereo <sup>1</sup> | Doxiciclina 100 mg / 12 horas vo durante 21 días                                              | Eritromicina 500 mg / 6 horas vo durante 21 días                                          | Azitromicina 1 gr / oral semana durante 3 semanas                              |                                                                                                    | Eritromicina 500 mg/ 6 horas vo durante 21 días                               |
| <i>Shigella</i> <sup>48</sup>       | Ciprofloxacino 500 mg / 12 horas vo durante 3 días<br>o<br>Azitromicina 1 gr dosis única oral | Cotrimoxazol 2 comp cada 12 horas vo durante 3 días                                       | Ceftriaxona 1gr/24 horas iv o Cefixima 400 mg/24 horas, vo durante 5 días.     | En inmunodeprimidos, Ciprofloxacino 500 mg / 12 horas vo durante 7-10 días.                        |                                                                               |

(\*) No comercializado en España

### Recomendaciones

1. En pacientes con sospecha clínica o epidemiológica de proctitis o proctocolitis, se debe realizar toma de muestras para exudado rectal mediante exploración preferentemente dirigida con proctoscopio de luz fría. En caso de observar signos clínicos de proctitis aguda, se podría iniciar un tratamiento empírico a la espera de los resultados microbiológicos (B-III).
2. Se recomienda realizar despistaje de otras ITS, ya que con frecuencia presentan otras ITS concomitantes (A-II).

### 4.3. Vulvovaginitis: Candidiasis, Vaginosis Bacteriana, Tricomoniasis

Las vulvovaginitis se caracterizan por secreción, molestias y prurito vulvar o vaginal, pudiendo frecuentemente cursar de manera asintomática. Entre las de causa infecciosa y por orden de frecuencia, destacan la vaginosis bacteriana, la vulvovaginitis por *Candida* y la tricomoniasis, con diferentes tipos de exudado vaginal según su etiología (Tabla 6).

**Tabla 6. Etiología y características de exudado vaginal de vulvovaginitis**

| Entidad Clínica             | Microorganismo Implicado                                                                                                                                                                                                                                                                               | Tipo de Exudado Vaginal                                    |
|-----------------------------|--------------------------------------------------------------------------------------------------------------------------------------------------------------------------------------------------------------------------------------------------------------------------------------------------------|------------------------------------------------------------|
| <b>Vaginosis bacteriana</b> | <i>Gardnerella vaginalis</i> ,<br><i>Prevotella</i> spp,<br><i>Porphyromonas</i> spp,<br><i>Bacteroides</i> spp,<br><i>Peptostreptococcus</i> spp,<br><i>Mycoplasma hominis</i> ,<br><i>Ureaplasma urealyticum</i> ,<br><i>Mobiluncus</i> spp<br><i>Fusobacterium</i> spp,<br><i>Atopobium vaginae</i> | Moderado, blanco-grisáceo, homogéneo adherente, maloliente |
| <b>Candidiasis</b>          | <i>Candida albicans</i> .<br>Candida no albicans: <i>C. tropicalis</i> , <i>C. glabrata</i> , <i>C. krusei</i> ,<br><i>C. parapsylosis</i> , <i>C. kefyr</i> ,<br><i>C. lusitanae</i>                                                                                                                  | Escaso-moderado, blanco-grisáceo, grumoso, inoloro         |
| <b>Tricomoniasis</b>        | <i>Trichomonas vaginalis</i>                                                                                                                                                                                                                                                                           | Aumentado, amarillo-verdoso o espumoso, maloliente         |

#### 4.3.1. Vaginosis bacteriana

Se define como un síndrome polimicrobiano donde se sustituye la flora vaginal habitual (*Lactobacillus spp.* o bacilo de *Döderlein*) por flora anaerobia, siendo *Gardnerella vaginalis* el microorganismo mayoritariamente implicado. A pesar de no considerarse una ITS, se ha asociado con un aumento del riesgo de adquisición y transmisibilidad de *Chlamydia trachomatis*, *Neisseria gonorrhoeae* o incluso VHS tipo 2 y VIH<sup>53,54</sup>

Es posible su diagnóstico clínico cumpliendo tres de los criterios de *Amsel* (flujo vaginal característico, olor aminas tras tratamiento con KOH, células *clue* en la microscopía, o pH vaginal >4.5). La concentración de *Lactobacillus* y microorganismos característicos en el Gram será la técnica de elección para su diagnóstico de laboratorio.

El tratamiento está indicado en pacientes sintomáticas o en las que se someterán a un procedimiento obstetro-ginecológico. Algunos expertos recomiendan el tratamiento en pacientes con prácticas sexuales de riesgo aunque estén asintomáticas<sup>55</sup>.

- a) De elección serán Metronidazol 500 mg /12h v.o 7 días o tópico al 0.75% 5 gr/ 24h, 5 días (I, A).
- b) Alternativa: crema vaginal de Clindamicina 2% 5 gr 1 vez día/ 7 días o Tinidazol 1gr/ 7 días v.o.

#### 4.3.2. Vaginosis candidiásica

Puede estar causada por *C. albicans* (80-92%) o candidas no *albicans*, con incidencia creciente en los últimos años<sup>56,58</sup>. La edad fértil, el uso de antibióticos, la actividad sexual, la inmunosupresión del paciente y la diabetes, son sus factores de riesgo más relacionados<sup>59</sup>.

Las vulvovaginitis candidiásicas no complicadas son las que cursan con síntomas moderados (usualmente leucorrea, prurito vulvar y dispareunia). Las complicadas, son en las que se aíslan candidas no *albicans*, presentan síntomas o signos severos, recurrentes (más de 4 episodios/año confirmados por cultivo) o se dan en mujeres gestantes o inmunodeprimidas. Esta clasificación condiciona el tratamiento (Tabla 7) que se deberá llevar a cabo únicamente en mujeres sintomáticas.

Habitualmente el diagnóstico es clínico y por exploración ginecológica, pudiéndose observar hifas con KOH en la microscopía de exudado vaginal. Se recomienda el cultivo para confirmación diagnóstica<sup>60</sup> y en los casos de candidiasis complicada para identificar posibles resistencias a azoles<sup>58</sup>.

Las parejas sexuales de las pacientes pueden tener un papel importante como reservorio fúngico, estando su tratamiento recomendado únicamente cuando sean sintomáticas<sup>57</sup>, y pudiendo considerarse ante casos de candidiasis recurrente.

#### 4.3.3. Tricomoniasis Vaginal

La infección por *T. vaginalis* es asintomática en al menos el 50% de las mujeres y el 80% de los hombres, con etiología casi exclusivamente de transmisión sexual. Está descrita su asociación con cuadros de vaginosis bacteriana, infecciones por clamidia, gonococo, VHS, sífilis y VIH, del que facilita su transmisibilidad y adquisición<sup>61</sup>.

De forma característica, la tricomoniasis vaginal se presenta como secreción vaginal maloliente con irritación vulvar que aumenta durante la menstruación, y el típico signo de “cérvix en fresa” a la exploración.

Clásicamente el diagnóstico se realiza por la visualización en fresco de *T. vaginalis*, numerosos polimorfonucleares en la secreción vaginal, y el cultivo del patógeno. Durante los últimos años las pruebas de detección de ácidos nucleicos han pasado a ser la técnica de elección<sup>61</sup>, los cuales pueden realizarse en secreciones vaginales, exudado endocervical o uretral, y en orina.

El tratamiento de la tricomoniasis está recomendado en los pacientes sintomáticos, asintomáticos, y en sus parejas sexuales, aconsejándose realizar un cribado que descarte la coexistencia de otras ITS.

El régimen recomendado actualmente es Metronidazol o Tinidazol 2 gr MD vo (I,B) en pacientes seronegativos a VIH, Metronidazol 2 gr MD vo en gestantes, y pautas más prolongadas (Metronidazol 500 mg 1comp/12h vo 7 días) en pacientes seropositivos y ante fallos de tratamiento, cuya causa principal será la reinfección y la falta de adherencia al tratamiento<sup>55,61</sup>. Se aconseja la abstinencia sexual hasta 7 días tras la toma antibiótica.

Organismos internacionales recomiendan realizar un test de control a los 3 meses a las mujeres infectadas por alta probabilidad de reinfección. Este test estará claramente indicado en pacientes VIH y ante recurrencia o no resolución de los síntomas<sup>62</sup>.

**Tabla 7. Tratamiento de la candidiasis<sup>60,63</sup>**

| <b>No complicadas</b>                                                                                                                                                                                                            |                                                                                                                                                                                                                                                                                                                            |
|----------------------------------------------------------------------------------------------------------------------------------------------------------------------------------------------------------------------------------|----------------------------------------------------------------------------------------------------------------------------------------------------------------------------------------------------------------------------------------------------------------------------------------------------------------------------|
| <ul style="list-style-type: none"> <li>- Clotrimazol: 500mg óvulo vaginal MD / ó 200 mg óvulos/24h x 3 días</li> <li>- Clotrimazol crema intravaginal al 1% 7-14 días</li> <li>- Alternativa: Fluconazol 150 mg vo MD</li> </ul> |                                                                                                                                                                                                                                                                                                                            |
| <b>Complicadas</b>                                                                                                                                                                                                               |                                                                                                                                                                                                                                                                                                                            |
| <i>C. albicans</i>                                                                                                                                                                                                               | <ul style="list-style-type: none"> <li>- Clotrimazol óvulo intravaginal 100 mg 7-14 días</li> <li>- Alternativa : Fluconazol 150 mg vo c/72h x 3 dosis</li> <li>- Si recurrente: Fluconazol 150 mg vo c/72h x 3 dosis + 150mg 1comp/semana 6 meses</li> </ul>                                                              |
| <i>C. no albicans</i>                                                                                                                                                                                                            | <ul style="list-style-type: none"> <li>- <i>Candida glabrata</i>: Itraconazol 100 mg 2 comp/día 3 días o ácido bórico cápsulas 600 mg 1 caps/día / 14 días</li> <li>- <i>Candida krusei</i>: Clotrimazol 100 mg óvulos/24h 7-14 días</li> <li>- Resto especies: Fluconazol 150 mg 1 comprimido vo c/72h 3 dosis</li> </ul> |
| (Según antibiograma)                                                                                                                                                                                                             | <ul style="list-style-type: none"> <li>- Si recurrente: Se recomiendan dosis de mantenimiento prolongadas según antibiograma</li> </ul>                                                                                                                                                                                    |
| Mujeres gestantes                                                                                                                                                                                                                | <ul style="list-style-type: none"> <li>- Clotrimazol 100 mg óvulos 1 óvulo/día por 7 días</li> </ul>                                                                                                                                                                                                                       |

**Recomendaciones**

1. Ante el diagnóstico de vaginosis bacteriana se indicará tratamiento en pacientes sintomáticas o en las que se vayan a someter a un procedimiento obstetro-ginecológico **(B-II)**. Algunos expertos recomiendan el tratamiento en pacientes con prácticas sexuales de riesgo aunque estén asintomáticas **(C-III)**.
2. El tratamiento de la tricomoniasis está recomendado en pacientes sintomáticos, asintomáticos, y en sus parejas sexuales, aconsejándose realizar un cribado que descarte la coexistencia de otras ITS **(A-II)**.
3. El tratamiento de la vulvovaginitis candidiásica estará indicado únicamente en mujeres sintomáticas, no estando recomendado de rutina en sus parejas sexuales **(A-I)**.

#### 4.4. Balanopostitis

La balanitis es un proceso inflamatorio que afecta al glande y que suele coexistir con la inflamación del prepucio, denominándose en este caso balanopostitis (BP).

Es un proceso más frecuente en varones no circuncidados. La no retracción del prepucio contribuye a su aparición. Otros factores predisponentes son la higiene deficiente o exagerada, diabetes, infecciones, alergias de contacto, uso de automedicación tópica, o traumatismos.

Entre las causas o tipos de BP se describen<sup>64,65</sup>.

- Balanitis traumática: por heridas accidentales o traumatismos de fricción que originan erosiones y/o fisuras.
- Balanitis irritativa: por falta de higiene, retención de esmegma. Uso de lubricantes, afrodisíacos, antisépticos o tratamientos tópicos.
- Balanitis alérgica: puede ser de contacto, por aplicación de un alérgeno provocando una reacción alérgica a dicho contactante. También puede ser una reacción alérgica, (toxicodermia) por administración oral o parenteral de un medicamento (sobre todo doxiciclina, ácido acetil salicílico y antiinflamatorios no esteroideos, entre otros) que provoca un exantema en glande que puede ser ampolloso con ulceración posterior (eritema fijo pigmentario o exantema fijo medicamentoso).
- Balanitis infecciosas:
  - B. por anaerobios: puede presentar una inflamación subprepuical con mal olor.
  - B. candidiásica (BC): es la más frecuente de todas las balanitis. Se presenta con frecuencia en varones diabéticos y puede ser incluso la primera manifestación de la diabetes. También se puede presentar en pacientes no diabéticos en los que su pareja presenta episodios recurrentes de vulvovaginitis candidiásica. También puede acontecer en otras situaciones como el uso de corticoides tópicos. Clínicamente se manifiesta con prurito. En la exploración se observan áreas de eritema y/o pápulas con descamación en collarete. Con respecto al tratamiento, es fundamental mantener la zona limpia y seca y cuando precisan tratamiento se realiza con imidazoles tópicos (clotrimazol, fenticonazol, sertaconazol). Este tratamiento, junto con las medidas higiénicas, son suficientes en la gran mayoría de las BC, por lo que el tratamiento oral se requiere en pocas ocasiones.

- B. por virus: virus del herpes simple, virus del papiloma humano.
- B. por otras infecciones bacterianas que causan úlceras como son el *Treponema pallidum* o la úlcera por CT/LGV.
- Balanitis crónicas:
  - Balanitis circinada: se puede presentar de modo espontáneo o puede ser un signo de la enfermedad de Reiter tras un episodio de uretritis o enteritis.
  - Balanitis plasmocelular de Zoom: lesión crónica, circunscrita que se localiza en glándula o membrana prepucial con inflamación de células plasmáticas, se presenta en placas marronáceas o rojizas con aspecto exudativo y brillante.
  - Balanitis queratósica micácea y pseudoepiteliomatosa: afecta el glándula de varones en edad avanzada, no circuncidados. Se inicia como una placa cubierta de escamas micáceas, plateadas, de aspecto psoriasiforme, que pueden hacerse francamente queratósicas, con atrofia y pérdida de elasticidad.
  - Liquen escleroso (LE) y su forma más avanzada, la balanitis xerótica *obliterans*, caracterizada por una fibrosis que afecta a toda la circunferencia del prepucio, impidiendo su retracción.
- Carcinoma escamoso de pene (CEP) que podemos distinguir entre<sup>66</sup>.
  - CEP in situ. El CEP se origina a partir de la progresión de una lesión precursora que puede subclasificarse según la intensidad y extensión de la atipia celular y la presencia o no de VPH. El aspecto clínico de los carcinomas in situ puede ser muy variable; desde lesiones subclínicas que se visualizan mediante penoscopia con tinción de ácido acético; hasta lesiones rojizas (eritroplasia de *Queyrat*) y enfermedad de *Bowen*, blanquecinas (leucoplasia) o marronáceas (papulosis *bowenoide*).
  - CEP invasivo. El aspecto clínico del CEP invasivo puede ser muy variable, desde una placa eritematosa, una úlcera o un verdadero tumor exofítico o de aspecto verrugoso; pueden ser pétreas o friables y de tamaño variable. Suelen ser únicas y localizarse en cualquier parte del pene pero lo más frecuente es que afecten a su tercio anterior (glándula, surco balano-prepucial y prepucio).

### **Recomendaciones**

1. *La balanitis candidiásica no se considera una infección de transmisión sexual, por lo tanto no es necesario estudiar a los contactos sexuales de forma sistemática. Se debe individualizar en cada caso (C-III).*
2. *Se recomienda especial atención a las balanitis persistentes, recurrentes o crónicas, debiendo ser evaluadas por un especialista en dermatología (B-III)*

### **4.5. Orquiepididimitis**

La orquiepididimitis aguda es un síndrome clínico caracterizado por dolor, edema e inflamación del epidídimo, pudiendo estar también el testículo ipsilateral afectado.

En su forma aguda (< de 6 semanas de duración) su etiología es principalmente infecciosa por extensión de la infección desde la uretra (en los casos de las ITS) o desde la vejiga o próstata (en el caso de las infecciones urinarias o en pacientes sometidos a instrumentación urológica). En los pacientes de menos de 35 años, sexualmente activos, los microorganismos principalmente implicados son *Chlamydia trachomatis*, *Neisseria gonorrhoeae* y enterobacterias transmitidas sexualmente si se practicara sexo anal insertivo<sup>1,44</sup>. Además, infecciones complicadas por *Mycoplasma genitalium* también podrían dar lugar a epididimitis. En grupos de más edad, el cuadro se presenta frecuentemente de forma secundaria a complicaciones de infecciones urinarias<sup>67</sup>, principalmente por enterobacterias o *Pseudomonas aeruginosa*.

La forma de presentación gradual del cuadro agudo, que puede incluir también afectación del estado general, vómitos y fiebre, ayuda en el diagnóstico diferencial frente a la torsión testicular, que se presenta como una urgencia quirúrgica usualmente en pacientes menores de 20 años. En pacientes jóvenes y no vacunados, además habría que considerar la orquitis como complicación del virus de la parotiditis<sup>67</sup>.

Por otro lado, las formas crónicas cursan con malestar y dolor durante más de 6 semanas. Su diagnóstico diferencial es más amplio pudiendo ir desde etiología traumática, autoinmune o neoplásica hasta infecciosa (más típicamente etiología tuberculosa o brucelar)<sup>67</sup>.

El diagnóstico de la orquiepididimitis aguda es fundamentalmente clínico<sup>68</sup>, con palpación de un epidídimo engrosado y doloroso, pudiendo existir similar afectación testicular,

que además puede mostrar un hidrocele reactivo. La obtención de exudado uretral - para realizar un Gram, pruebas de detección de ácidos nucleicos para *Chlamydia trachomatis* y *Neisseria gonorrhoeae* (se podrían realizar también en orina), y para cultivo de gonococo, (que es el *gold standard*), servirán para confirmar la etiología de transmisión sexual<sup>67,68</sup>. En los casos de sospecha de patología urológica, se cursará un sedimento de orina y un urocultivo.

El tratamiento debe ser ofrecido de forma empírica a todos los pacientes en función de su sospecha etiológica. Además del tratamiento antibiótico (ver tabla 8), están recomendadas otras medidas como antiinflamatorios no esteroideos (AINES) y la elevación escrotal.

**Tabla 8. Tratamiento de orquiepididimitis aguda**

| Etiología                                                               | Tratamiento                                                                                                                                                                                                                                 | Alergia cefalosporinas/tetraciclinas                   |
|-------------------------------------------------------------------------|---------------------------------------------------------------------------------------------------------------------------------------------------------------------------------------------------------------------------------------------|--------------------------------------------------------|
| Infección de transmisión sexual                                         | -Sindrómico <sup>67,68</sup> :<br><br>Ceftriaxona 500 mg IM MD*+ Doxiciclina 100 mg 1comp/12 h /10- 14 días*<br><br>-Por <i>Mycoplasma genitalium</i> <sup>44</sup> (poco frecuente)<br><br>Azitromicina 500 mg v.o. MD+ 250 mg/24h/4 días. | Ofloxacino 200 mg<br>1 comp/12h/ 14 días <sup>68</sup> |
| Infección vías urinarias/sospecha de organismos entéricos <sup>67</sup> | Ciprofloxacino 500 mg, 1 comp/12h 10 días                                                                                                                                                                                                   |                                                        |

\*Añadir azitromicina 1 gr si la sospecha de gonococia es alta

Respecto al seguimiento, en todos los pacientes en los que se confirme etiología sexual se deberán descartar por cribado otras ITS, y evaluar a sus parejas sexuales de los últimos 60 días. La mejoría debe ser notable en las primeras 72 horas tras iniciar tratamiento; si no fuera así, el paciente debería ser reevaluado para descartar complicaciones.

### **Recomendaciones**

1. El tratamiento empírico debe ser administrado ante la sospecha clínica sin esperar a resultados microbiológicos (**B-III**).
2. En menores de 35 años la sospecha principal debe ser la etiología de transmisión sexual, recomendándose tratamiento sindrómico (**B-III**).

3. *En pacientes con relaciones anales no protegidas, además de considerarse los organismos entéricos, habría que considerar los microorganismos implicados en la etiología de transmisión sexual (B-II).*

#### 4.6. Enfermedad inflamatoria pélvica

Es una infección aguda del tracto genital interno que afecta al útero, endometrio, trompas u ovarios y que puede involucrar a órganos vecinos<sup>69</sup>. Se adquiere por vía ascendente desde la vagina o cérvix dando lugar a los distintos síndromes: endometritis, salpingitis, ooforitis, peritonitis, peri-hepatitis y absceso tubo-ovárico. El síntoma principal a todos ellos es el dolor pélvico, acompañado de signos inflamatorios del tracto genital, si bien en ocasiones el cuadro es sutil e incluso silente.

##### 4.6.1. Patogenia

La mayoría de los casos (85%) son patógenos causa de ITS (*Neisseria gonorrhoeae*, *Chlamydia trachomatis*, y *Mycoplasma genitalium*) o microorganismos relacionados con la vaginosis bacteriana (*Gardnerella vaginalis*, *Peptostreptococcus spp*, *Bacteroides spp*), *Atopobium vaginae*, *Leptotrichia spp*, *Mycoplasma. hominis*, *Ureaplasma urealyticum*, y especies de clostridios. En un 15% son gérmenes no asociados con ITS (gérmenes entéricos -*Escherichia coli*, *Bacteroides fragilis*, estreptococo del grupo B, y *Campylobacter spp*- o respiratorios (*Haemophilus influenzae*, *Streptococcus pneumoniae*, estreptococos del grupo A, y *Staphylococcus aureus*) que han colonizado el tracto genital<sup>1,69,70</sup>.

La EIP crónica puede estar causada por *Mycobacterium tuberculosis* o *Actinomyces spp*. Se desconocen con exactitud las causas por la que los microorganismos logran eludir la barrera cervical y ascender por el tracto genital si bien se implican factores inmunológicos, bioquímicos como enzimas producidas por los gérmenes que degradan el moco cervical o proteínas microbicidas del tracto genital, o mecánicos como el coito. Existen diversos factores de riesgo para la EIP como son las parejas sexuales múltiples, la edad inferior a 25 años, la infección sexual de la pareja, el no uso de preservativo, los antecedentes de maniobras instrumentales (inserción de un DIU tras las primeras semanas de la misma, legrado uterino, etc.).

##### 4.6.2. Clínica

Ha de sospecharse una EIP en pacientes sexualmente activas, con dolor abdominal y molestias pélvicas<sup>1</sup>. El hallazgo fundamental es el dolor en la zona baja del abdomen, de intensidad variable, generalmente bilateral, acompañado o no de otros síntomas como

secreción vaginal, síntomas urinarios, sangrado intermenstrual o postcoital, o dispareunia, y puede haber fiebre o febrícula. También puede producirse, como se ha comentado, un cuadro clínico silente u oligosintomático e inespecífico, dando lugar a la EIP subclínica. En cualquier caso, tanto la forma clínica como la subclínica puede producir consecuencias a largo plazo, tales como infertilidad o subfertilidad de causa tubárica (por pérdida del recubrimiento epitelial de las trompas, y por adherencias). Otra de las secuelas es el dolor pélvico crónico.

#### 4.6.3. Diagnóstico

El diagnóstico se basa en los síntomas (dolor en la zona baja del abdomen) y aumento de la sensibilidad a la palpación del útero o anejos y a la movilización cervical; y los signos de inflamación del tracto genital inferior (secreción cervical mucopurulenta). Como pruebas complementarias están la ecografía transvaginal que puede observar la presencia de dilataciones tubáricas (hidrosalpinx) o de abscesos tubo-ováricos, si bien son hallazgos que no siempre están presentes. En algunas mujeres el único signo de EIP es la presencia de endometritis en muestra biopsica.

Tanto la ecografía como otras técnicas de imagen (TAC, RMN) pueden ayudar al diagnóstico diferencial con otros procesos como los quistes ováricos, endometriosis, embarazo ectópico o apendicitis.

Si existe sospecha de EIP se realizan test de las muestras cervicales para la detección de *C. trachomatis* y *N. gonorrhoeae* y del fluido vaginal para la detección de vaginosis bacteriana, pero no se debe esperar a los resultados para instaurar el tratamiento. Determinaciones adicionales son un test de embarazo y serologías para otras ITS como sífilis o VIH. Otros hallazgos que ayudan al diagnóstico son la leucocitosis en el hemograma o la elevación de la proteína C reactiva si bien son inespecíficos.

#### 4.6.4. Tratamiento

Se basa en la administración empírica de antibióticos de amplio espectro que cubran a los principales patógenos. A este respecto se diferencia entre regímenes ambulatorios y regímenes en pacientes hospitalizadas<sup>1,69</sup>. Las recomendaciones para hospitalizar a una paciente son: embarazo, no respuesta al tratamiento oral, incapacidad para la vía oral por náuseas o vómitos, afectación severa del estado general (fiebre, dolor severo, etc.), presencia de absceso tubo-ovárico o previsión de intervención quirúrgica. En estos últimos casos es imperativa la interconsulta con ginecología. La infección por VIH en sí, en ausencia de signos de gravedad, no es una indicación para el ingreso.

Los regímenes recomendados son:

**a. Tratamiento ambulatorio:**

Se basa en la combinación de una cefalosporina con doxiciclina, acompañados o no de metronidazol (si presencia de absceso pélvico, sospecha de vaginosis bacteriana o antecedentes de instrumentación en las dos o tres semanas precedentes). Las pautas son:

- Ceftriaxona (500 mg IM dosis única) más doxiciclina (100 mg/12 horas, 14 días, v.o) +/- metronidazol (500 mg/12 horas, 14 días, v.o).
- Cefotaxima (1 g, IM, dosis única) o Ceftizoxima (1 g, IM, dosis única) más doxiciclina (100 mg/12 horas, 14 días,vo) +/- metronidazol (500 mg/12 horas, 14 días, v.o).

En caso de alergia a penicilina:

- Levofloxacin (500 mg vo/24 h, 14 días) o doxiciclina (100 mg/12 horas, 14 días, v.o) más una dosis única de azitromicina (2g v.o) en ambos casos.

**b. Tratamiento en pacientes hospitalizadas:**

- Cefoxitina (2 g IV/6 horas) o cefotetán (2 g IV/12 horas) más doxiciclina (100 mg/12 horas, v.o hasta completar 14 días de tratamiento).
- Clindamicina (900 mg IV/8 horas) más gentamicina (1.5 mg/kg peso/8 horas). La gentamicina se puede administrar en dosis única, más doxiciclina (100 mg/12 horas, v.o hasta completar 14 días de tratamiento).

**EIP en las pacientes con infección por el VIH**

La respuesta al tratamiento en pacientes con infección por VIH es similar a las no infectadas, por lo que los regímenes de tratamiento, y las indicaciones para la hospitalización son las mismas.

**Recomendaciones**

1. *Se ha de sospechar una enfermedad inflamatoria pélvica en toda mujer sexualmente activa con dolor o molestias pélvicas, sobre todo si se acompaña de fiebre o febrícula u otros síntomas como secreción vaginal, síntomas urinarios, sangrado intermenstrual o postcoital, etc. (A-II).*
2. *El tratamiento de la enfermedad inflamatoria pélvica se basa en la administración de antibióticos de amplio espectro que cubran los gérmenes más frecuentemente implicados (A-II). Se deberá administrar el tratamiento en régimen hospitalario ante la*

*presencia de determinados factores de riesgo como el embarazo, afectación severa del estado general, presencia de abscesos pélvicos, etc. (A-II).*

3. *La infección por el VIH no supone diferencias en la respuesta al tratamiento de la enfermedad inflamatoria pélvica por lo que su manejo es similar al de las pacientes no infectadas (B-II).*

#### **4.7. Enfermedades ulcerativas**

Las úlceras genitales pueden deberse a causas infecciosas y no infecciosas, siendo la causa más frecuente las infecciones de transmisión sexual. La prevalencia de los diferentes patógenos depende del área geográfica. El diagnóstico es difícil debido a la frecuente coexistencia de diferentes microorganismos. Además, la presencia de úlceras genitales es un factor de riesgo de transmisión del VIH<sup>71</sup>.

En clínicas de enfermedades de transmisión sexual de Asia o África, las úlceras genitales representan el 20-70% de todas las consultas, mientras que en los países desarrollados no superan el 3-4%<sup>71</sup>.

##### **4.7.1. Virus herpes simple**

Infección recidivante y persistente que puede estar producida por los dos diferentes serotipos del virus herpes (VHS-1 y 2)<sup>71</sup>. Aunque un 30% de los primeros episodios de herpes genital están causados por VHS-1, las recidivas son mucho más frecuentes para el VHS-2 en el área genital; por tanto la distinción serológica entre ambos tipos es importante para el pronóstico y para la información que debemos dar al paciente.

El diagnóstico clínico del herpes genital es poco sensible, los métodos citológicos son inespecíficos y los de detección antigénica no permiten la diferenciación entre serotipos<sup>1</sup>. Puede ser útil la serología específica que detecta IgG frente a cada serotipo, su sensibilidad oscila del 80 al 98%, los falsos negativos se pueden producir al comienzo de la infección por lo que hay que repetir la prueba. Su especificidad es del 96%<sup>1,71-74</sup>. La sensibilidad del cultivo es baja. La PCR es muy sensible y específica<sup>2</sup>.

El tratamiento del herpes genital recidivante debe comenzar el 1er día o en el período prodrómico<sup>3</sup>. La terapia supresora reduce entre un 70-80% la frecuencia de recidivas e incluso muchos pacientes no presentan ningún síntoma<sup>72,73</sup>. Sin embargo no es tan eficaz a la hora de disminuir la excreción viral asintomática<sup>73</sup>. (Tabla 9)

**Tabla 9. Tratamiento del herpes genital**

| TRATAMIENTO                                              | POBLACIÓN NO VIH                                                                                              | POBLACIÓN VIH                                                                                     |
|----------------------------------------------------------|---------------------------------------------------------------------------------------------------------------|---------------------------------------------------------------------------------------------------|
| <b>Infección grave</b>                                   | Aciclovir IV 5-10 mg/kg/8 h 5-10 días                                                                         |                                                                                                   |
| <b>1er episodio</b> <sup>1,71-78</sup>                   | Aciclovir vo 400 mg/8h 7-10 días                                                                              | Aciclovir vo 400 mg/8h, 7 a 10 días                                                               |
|                                                          | Famciclovir vo 250 mg/8h, 7-10 días.                                                                          | Famciclovir vo 500 mg/12h, 7-10 días                                                              |
|                                                          | Valaciclovir vo 500 mg 12h, 7-10 días.                                                                        | Valaciclovir vo 1 gr/12h, 7-10 días                                                               |
| <b>Recurrencias</b>                                      | Aciclovir vo 400 mg/8h, 5 días<br>ó<br>Aciclovir vo 800 mg/12h, 5 días<br>ó<br>Aciclovir vo 800 mg/8h, 2 días | Aciclovir 400 vo mg/8h, 5-10 días                                                                 |
|                                                          | Famciclovir vo 1g/12h, 1 día.                                                                                 | Famciclovir vo 500 mg/12h, 5-10 días                                                              |
|                                                          | Valaciclovir vo 500 mg/12 h, 3 días.<br>ó<br>Valaciclovir vo 1g/día, 5 días                                   | Valaciclovir vo 1 g/12 h, 5-10 días.                                                              |
|                                                          | Aciclovir vo 400 mg/12h 6-12 meses                                                                            | Aciclovir vo 400-800 mg/12h u 8h, 6-12 meses                                                      |
|                                                          | Famciclovir vo 250 mg/12h                                                                                     | Famciclovir vo 500 mg/12h                                                                         |
|                                                          | Valaciclovir vo 500 mg/día                                                                                    | Valaciclovir vo 500 mg/12h                                                                        |
| <b>Supresivo</b> <sup>1, 71-75</sup>                     | <b>GESTANTES</b>                                                                                              |                                                                                                   |
|                                                          | Aciclovir vo 400 mg/8h                                                                                        |                                                                                                   |
|                                                          | Valaciclovir vo 500 mg/12h                                                                                    |                                                                                                   |
|                                                          |                                                                                                               | Si gestantes VIH con serología positiva pero sin lesiones genitales, no se recomienda tratamiento |
|                                                          |                                                                                                               |                                                                                                   |
| <b>Alternativo</b> (Sospecha de resistencia a Aciclovir) | Foscarnet IV 40 mg/Kg/8h, 14-21 días                                                                          | Foscarnet IV 60 mg/Kg/día hasta respuesta clínica                                                 |
|                                                          | Foscarnet IV 60 mg/Kg/12h, 14-21 días                                                                         |                                                                                                   |
|                                                          | Cidofovir 5 mg IV/Kg/semanal                                                                                  |                                                                                                   |
|                                                          | Cidofovir 1% gel: 1 aplicación/día, 5 días                                                                    |                                                                                                   |

**Recomendaciones**

1. En los pacientes con un 1er episodio se recomienda determinar si es VHS-1 o VHS-2 para su manejo y consejo al paciente (**B-III**).
2. La detección de ADN-VHS por PCR es el método de elección para el diagnóstico (**A-I**).

3. Cuando el cuadro clínico es sugestivo, se recomienda repetir la serología para demostrar seroconversión de IgM, sobre todo en los casos con IgG negativa **(B-II)**.
4. En el tratamiento supresivo la terapia con mayor experiencia es el Aciclovir **(A-I)**. No existen diferencias entre el Valaciclovir y el Famciclovir **(C-III)**.

#### 4.7.2. Sífilis

Causada por *Treponema pallidum* (ver capítulo 5).

#### 4.7.3. *Haemophilus ducreyi* (chancroide)

Es infrecuente en Europa pero presente en el Caribe, América del Sur, India y África. Se presenta como úlcera dolorosa única o múltiple y puede acompañarse de linfadenopatía regional. El diagnóstico se obtiene por cultivo, aunque la sensibilidad es menor al 80%, y por PCR. Tratamiento: azitromicina 1 gr única dosis oral, ceftriaxona 250 mg intramuscular, ciprofloxacino 500 mg cada 12 horas oral durante 3 días o eritromicina 500 mg/6-8 horas oral durante 7 días<sup>77,79</sup>.

#### Recomendaciones

1. El diagnóstico se basa en técnicas de PCR con la ventaja de poder simultanear con otros patógenos como *T. pallidum* y herpes virus **(B-III)**.
2. Se recomienda la abstinencia sexual hasta que su pareja haya completado el tratamiento **(C-III)**.
3. Tratamiento de primera línea: Ceftriaxona 250 mg IM (A-I), azitromicina 1 gr dosis única **(A-I)**.
4. Tratamiento de 2ª línea: Ciprofloxacino 500 mg BID durante 3 días **(B-I)**.

#### 4.7.4. *Chlamydia trachomatis* genotipo L1-3 (linfogranuloma venéreo)

La lesión primaria ocurre en el sitio de inoculación a los 3-30 días después del contacto en forma de una pústula indolora que se ulcera. A los 3-6 meses aparece un estadio secundario que se manifiesta como un síndrome inguinal o anogenitorrectal acompañado de adenopatías unilaterales y fiebre, artromialgias y malestar general. En pacientes homosexuales la proctitis o proctocolitis puede ser similar a la enfermedad de Crohn. En raros casos, puede progresar a un estadio terciario con una respuesta inflamatoria crónica. El diagnóstico es por PCR. El

tratamiento de elección es doxiciclina 100 mg/12 horas durante 21 días y como alternativas eritromicina 500 mg/6h 21 días o azitromicina 1 gr/semanal durante 3 semanas<sup>1,71,72</sup>.

### Recomendaciones

1. *Se recomienda el estudio sistemático de LGV a todos los HSH que refieran prácticas anales receptivas en los 6 meses previos (A-II).*
2. *Existe una asociación significativa entre el VIH y el LGV (A-I).*
3. *El tratamiento de elección es doxiciclina 100 mg/12 horas durante 21 días (B-II).*
4. *El tratamiento alternativo es eritromicina 500 mg/6h 21 días o azitromicina 1 gr/semanal durante 3 semanas (B-III).*

#### 4.7.5. *Klebsiella granulomatis* (granuloma inguinal o “Donovanosis”)

Enfermedad endémica en África del Sur, India y Australia y excepcional en el mundo occidental. Produce lesiones progresivas ulceradas, sangrantes, indoloras y sin adenopatías regionales. Diagnóstico: visualización de los cuerpos de Donovan en las muestras de tejido. Tratamiento de elección: azitromicina 1 gr/semanal o 500 mg/24 h durante al menos 3 semanas. Tratamiento alternativo: doxiciclina 100 mg/12h o trimetoprim-sulfametoxazol 160/800 mg cada 12 horas durante al menos 21 días<sup>77,79-81</sup>.

### Recomendaciones

1. *Tratamiento de elección: azitromicina 1 gr/semanal o 500 mg/24 h durante al menos 3 semanas (B-I).*
2. *Tratamiento alternativo: doxiciclina 100 mg/12h (C-III) o trimetoprim-sulfametoxazol 160/800 mg cada 12 horas (C-III) durante al menos 21 días.*

#### 4.7.6. VIH, *Citomegalovirus* y virus Epstein-Barr

Pueden ser causantes de úlceras genitales pero con mucha menor frecuencia.

En la tabla 10 se recogen las pruebas diagnósticas de las principales infecciones ulcerativas referidas en el texto.

**Tabla 10. Pruebas diagnósticas de las principales infecciones ulcerativas**

|                            | <b>Herpes</b>                              | <b>Sífilis</b>                                                            | <b>Chancroide</b>                                                                    | <b>LGV</b>                                                        | <b>Granuloma Inguinal</b>                                                |
|----------------------------|--------------------------------------------|---------------------------------------------------------------------------|--------------------------------------------------------------------------------------|-------------------------------------------------------------------|--------------------------------------------------------------------------|
| <b>Observación directa</b> | Preparación de Tzanck.<br>IFD              | Microscopía de campo oscuro.<br>IFD.                                      | Tinción de gram del exudado con típico agrupamiento en cadenas del <i>H. ducreyi</i> | IFD: No es útil.                                                  | Identificación de los cuerpos de Donovan en el interior de los fagocitos |
| <b>Cultivo</b>             | Medios específicos para virus              | <i>T. pallidum</i> no se puede cultivar.                                  | Cultivo en medios específicos no comerciales                                         | No es útil:<br>Difícil y poco sensible.                           | Muy difícil de cultivar.                                                 |
| <b>PCR<sup>11</sup></b>    | Se pueden utilizar incluso pasados 5 días. | No disponible de forma rutinaria.                                         | No disponible de forma rutinaria.                                                    | Técnica de elección.                                              | Poco desarrollada.                                                       |
| <b>Serología</b>           | Utilidad limitada en las recidivas         | Pruebas treponémicas y no treponémicas. Pueden ser negativas inicialmente | No disponible.                                                                       | Aumento del título en dos determinaciones seriadas o título alto. | No disponible                                                            |

IFD: Inmunofluorescencia directa; PCR: Reacción en cadena de polimerasa.

#### 4.8. Hepatitis

Se remite al lector a los documentos correspondientes emitidos por GEHEP y GeSIDA.

Ver resumen en tabla 11.

**Tabla 101. Tabla resumen de la hepatitis A, B y C**

|                       | <b>Hepatitis A</b>                                                                                                                          | <b>Hepatitis B</b>                                                                                                                                  | <b>Hepatitis C</b>                                                                   |
|-----------------------|---------------------------------------------------------------------------------------------------------------------------------------------|-----------------------------------------------------------------------------------------------------------------------------------------------------|--------------------------------------------------------------------------------------|
| <b>Transmisión</b>    | Fecal-oral.                                                                                                                                 | Parenteral, sexual o vertical.                                                                                                                      | Parenteral y vertical. Sexual en HSH.                                                |
| <b>Pº. incubación</b> | 15-50 días.                                                                                                                                 | 45-180 días                                                                                                                                         | 20-120 días.                                                                         |
| <b>Transmisión</b>    | De 3 semanas antes aparición ictericia hasta 1 semana después.                                                                              | Las personas AgHBs positivo son potencialmente contagiosas.                                                                                         | Desde una semana antes del inicio de los síntomas hasta la curación.                 |
| <b>Clínica</b>        | Asintomática o aguda con síntomas prodrómicos Anorexia, náuseas, vómitos que disminuyen tras la aparición de ictericia 1-2 semanas después. | Asintomática o aguda. Posible hepatitis fulminante. El 5% de las infecciones en adultos y el 70-90% en recién nacidos evolucionan a formas crónicas | Asintomática (80%) o sintomática (20%).<br>85% de los casos evoluciona a cronicidad. |
| <b>Diagnóstico</b>    | Serología: detección de IgM anti-VHA.                                                                                                       | Serología: IgM anti-HBc (infección actual o                                                                                                         | Serología: detección de anticuerpos anti-VHC.                                        |

|                    |                                                                                                                                                                                                             |                                                                                                                                                                                                                                                                                                                                                                                                                                                                                                                                                             |                                                             |
|--------------------|-------------------------------------------------------------------------------------------------------------------------------------------------------------------------------------------------------------|-------------------------------------------------------------------------------------------------------------------------------------------------------------------------------------------------------------------------------------------------------------------------------------------------------------------------------------------------------------------------------------------------------------------------------------------------------------------------------------------------------------------------------------------------------------|-------------------------------------------------------------|
|                    | Técnicas de amplificación de ácidos nucleicos.                                                                                                                                                              | reciente), anti-HBs y anti-HBc IgG (infección pasada o inmunidad).<br><br>Cuantificación DNA-VHB mediante amplificación de ácidos nucleicos o PCR.                                                                                                                                                                                                                                                                                                                                                                                                          | Técnicas de amplificación de ácidos nucleicos mediante PCR. |
| <b>Tratamiento</b> | Sintomático                                                                                                                                                                                                 | Fulminantes: Trasplante hepático.<br><br>Crónica: Entecavir 0,5-1 g/día (según haya o no resistencias) o tenofovir 300 mg/día en pautas largas hasta conseguir la seroconversión del HBeAg y negativización del DNA-VHB (en las hepatitis HBeAg positivo) o indefinidamente en las hepatitis HBeAg negativo.<br><br>Alternativas: Adefovir 10 mg/día, lamivudina 100 mg/día o Telbivudina 600 mg/día. En el paciente HBeAg positivo con ALT elevada y DNA-VHB bajo puede utilizarse interferón pegilado alfa-2 <sup>a</sup> 180 mcg/semanal sc, 6-12 meses. | Ver consenso de SEIMC                                       |
| <b>Prevención</b>  | Vacuna de virus inactivado adyuvada con aluminio. Dosis de 0,5-1 ml IM seguida de 2 <sup>a</sup> dosis a los 6-12 meses.<br><br>Protección > 95%. En VIH + la tasa de respuesta depende de la cifra de CD4. | Vacuna inactivada obtenida mediante recombinación genética que contiene HBsAg.<br><br>Administrar 3 dosis de 0,5 ml a los 0, 1-2 y 6 meses de haber recibido la primera dosis. Si se requiere protección rápida se puede utilizar la pauta de 0,1 y 2 meses o bien 0, 7 y 21 días con una 4 <sup>a</sup> dosis el mes 12.                                                                                                                                                                                                                                   | No existe vacuna.                                           |

- Sexually Transmitted Diseases Treatment Guidelines, 2015. MWR Recomm Rep 2015;64.
- Carmena J, Castro MA; García F, García del Toro M, Granados R, Mena A et al. Documento de consenso del grupo español para el estudio de la hepatitis (GEHEP) sobre el tratamiento de la hepatitis C (actualización de Junio-2015). <http://www.seimc.org/contenidos/gruposdeestudio/gehep/dcientificos/documentos/gehep-dc-2014-TratamientodelaHepatitisC.pdf>
- Documento de Consenso sobre Profilaxis postexposición ocupacional y no ocupacional en relación con el VIH, VHB y VHC en adultos y niños. (Marzo 2015). <http://www.gesida-seimc.org/contenidos/guiasclinicas/2015/gesida-guiasclinicas-2015-Profilaxispostexposicion-VIH-VHC-VHB.pdf>

## 5. SÍFILIS

### 5.1. Introducción

La sífilis es una enfermedad infecciosa sistémica producida por *Treponema pallidum*. Mediante el Sistema de Enfermedades de Declaración Obligatoria (EDO), en el año 2014, en España se declararon 3.576 casos (8 sífilis congénitas) con una tasa de 7,69 casos por 100.000 habitantes. Sus tasas se han incrementado paulatinamente desde el año 2000, si bien se observa una estabilización desde el 2011. El colectivo más afectado es el de hombres que tienen sexo con hombres (HSH).

### 5.2. Clínica

La sífilis primaria se caracteriza por la presencia de úlceras y adenopatías. A las 3-6 semanas se desarrolla la sífilis secundaria, caracterizada por espiroquetemia y manifestaciones cutáneas, que en su forma más característica es un exantema no pruriginoso que afecta frecuentemente a palmas y plantas. La infección VIH afecta muy poco la presentación clínica, observándose con mayor frecuencia la presencia de úlceras múltiples. En la sífilis latente no hay manifestaciones clínicas y puede perdurar en el tiempo. Según los ECDC, la sífilis adquirida precoz es la adquirida en el año previo e incluye la sífilis primaria, secundaria y latente precoz. Pasado este tiempo, se considera que es una sífilis adquirida tardía con infectividad muy reducida. En la fase latente tardía no hay clínica pero si reactividad serológica. Un 30-40% de los no tratados pueden desarrollar sífilis terciaria, que puede ser mucocutánea (gomos), ósea, cardiovascular o neurológica (neurosífilis), si bien esta última puede aparecer en cualquier periodo de la infección.

### 5.3. Diagnóstico

Habitualmente es indirecto, mediante serología. En algunos laboratorios puede realizarse el diagnóstico directo (campo oscuro, inmunofluorescencia directa o PCR), lo que permite el diagnóstico inmediato, incluso antes de la seroconversión<sup>1</sup>. Como norma general, el diagnóstico se hace con los mismos criterios para un paciente VIH negativo o positivo, aunque estos últimos pueden presentar reacciones serológicas anómalas (falsos negativos, seroconversiones lentas o títulos extremadamente elevados).

La microscopía de campo oscuro permite la visualización de treponemas vivos móviles en el fluido procedente de muestras exudativas de piel, mucosas así como de líquido amniótico o aspirados ganglionares. No son válidas muestras hemáticas ni de origen oral o anal. Precisa de una rápida observación (<30 minutos) en un microscopio de campo oscuro y por un

microscopista experto. Proporciona diagnóstico inmediato. Es un método laborioso, subjetivo y el resultado negativo no excluye la infección. Las técnicas de PCR tienen como principal ventaja su uso en lesiones orales. La sensibilidad en lesiones exudativas es del 70-95%, pero es inaceptable en sangre o suero. Es útil en lesiones sospechosas de individuos serológicamente no reactivos<sup>83</sup>. Existen comercializados formatos multiplex que en distintas combinaciones detectan *T. pallidum*, *Haemophilus ducreyi*, *Chlamydia trachomatis* serovariedad L y virus herpes simplex.

El diagnóstico serológico no treponémico (VDRL, RPR) determina semicuantitativamente (título) la presencia de anticuerpos frente a antígenos no específicos de treponema. Reflejan la actividad de la infección y permiten hacer un seguimiento de la respuesta al tratamiento. Después de un tratamiento correcto de una sífilis temprana, el título debe caer cuatro veces y llegar a ser negativo. Son pruebas sensibles pero presentan falsos positivos estimados en un 0,2-0,8% de los casos. Tardan unas 6 semanas en seroconvertir y pueden ser negativas en presencia de chancro<sup>84</sup>.

Las pruebas treponémicas incluyen TPHA, FTA, inmunoblot, EIA y quimioluminiscencia (CLIA). Estas últimas permiten la automatización y son las que se emplean de entrada en los algoritmos diagnósticos. Son técnicas cualitativas, más específicas y precoces que las no treponémicas y permanecen positivas de por vida incluso en infecciones tratadas.

### **Algoritmo diagnóstico**

En centros con gran volumen de muestras, iniciar con una prueba treponémica automatizada (EIA, CLIA). El resultado negativo en el contexto de cribado, excluye la infección. En un paciente con sospecha diagnóstica debe repetirse la extracción y el ensayo a las 6 semanas. El resultado positivo debe confirmarse con otra prueba treponémica distinta. De forma paralela, se realizará una prueba no treponémica para conocer el título basal (actividad), que empleará suero diluido y sin diluir para evitar el efecto prozona<sup>85,86</sup>. Si la segunda prueba treponémica no es positiva, puede plantearse realizar un inmunoblot (centro de referencia)<sup>87</sup>.

El seguimiento de la respuesta al tratamiento se realiza mediante la monitorización del título de VDRL/RPR. Siempre se debe usar la misma técnica e idealmente, en el mismo laboratorio.

### **Neurosífilis**

El diagnóstico precisa del estudio del LCR. La prueba de elección es el VDRL, que cuando es positivo (en ausencia de contaminación hemática) diagnostica una neurosífilis, si bien un

resultado negativo no la excluye (falsos negativos). La presencia de clínica neurológica con valores anormales en el LCR de células o proteínas es indicativa de neurosífilis. El resultado negativo de una prueba treponémica (idealmente FTA) en LCR hace muy improbable una neurosífilis.

#### 5.4. Tratamiento

La penicilina es el tratamiento de elección en todos los estadios de la sífilis si bien el tipo de penicilina, la dosis y la duración de misma depende del estadio de la sífilis. Los pacientes VIH deben ser tratados con el mismo régimen terapéutico que los pacientes seronegativos<sup>1</sup>. En la Tabla 12 se presentan las diferentes recomendaciones terapéuticas para el tratamiento y seguimiento de la sífilis.

**Tabla 112. Recomendaciones terapéuticas para el tratamiento y seguimiento de la sífilis**

|                                                                                   | Tratamiento de elección                                                                                                               | Tratamiento alternativo*                                                                                                                                                                                                                                                                                                                                    | Seguimiento                                                                                                                                                                                                                                                              |
|-----------------------------------------------------------------------------------|---------------------------------------------------------------------------------------------------------------------------------------|-------------------------------------------------------------------------------------------------------------------------------------------------------------------------------------------------------------------------------------------------------------------------------------------------------------------------------------------------------------|--------------------------------------------------------------------------------------------------------------------------------------------------------------------------------------------------------------------------------------------------------------------------|
| <b>Sífilis primaria, secundaria o sífilis latente precoz</b>                      | Penicilina G benzatina 2.4 millones de UI I.M.en dosis única <sup>82</sup>                                                            | <ul style="list-style-type: none"> <li>- Doxiciclina (100 mg/12h durante 2 semanas)</li> <li>- Azitromicina (2 g en dosis única) <sup>83,86,87</sup></li> </ul>                                                                                                                                                                                             | <ul style="list-style-type: none"> <li>- Control clínicos y serológicos (pruebas no treponémicas) a los 6 y 12 meses. <sup>88</sup></li> <li>- En los pacientes con sífilis latente las pruebas no treponémicas se harán a los 6, 12 y 24 meses <sup>88</sup></li> </ul> |
| <b>Sífilis latente tardía, sífilis de duración desconocida, sífilis terciaria</b> | Penicilina benzatina 2.4 millones de UI I.M./semana durante 3 semanas (días 0, 7 y 14)                                                | <ul style="list-style-type: none"> <li>- Doxiciclina (100 mg/12h durante 4 semanas) <sup>1</sup></li> </ul>                                                                                                                                                                                                                                                 | Control serológicos (pruebas no treponémicas) a los 6, 12, y 24 meses <sup>88</sup>                                                                                                                                                                                      |
| <b>Neurosífilis y sífilis oftálmica y ótica</b>                                   | Penicilina G sódica 3-4 millones UI (I.V cada 4 horas o 18-24 millones en infusión continua, ambas durante 10-14 días <sup>84</sup> . | <ul style="list-style-type: none"> <li>- Penicilina G procaina 2.4 millones de UI I.M al día más probenecid (500 mg/6 horas) durante 10-14 días.</li> <li>- En los alérgicos a la penicilina se recomienda la desensibilización y posterior tratamiento con penicilina</li> <li>- Ceftriaxona (2 g I.V. al día durante 10-14 días) <sup>85</sup></li> </ul> | Evaluación del LCR cada 6 meses hasta lograr la total normalidad del LCR                                                                                                                                                                                                 |

\* En los pacientes alérgicos a la penicilina las alternativas no han sido bien evaluadas como para poder posicionarlas como primera línea terapéutica

0. Basado en Workowski, 2015.
1. Aunque la mayoría de los pacientes VIH responden a este tratamiento, algunos autores recomiendan añadir 2 dosis adicionales semanales de penicilina G benzatina 2.400.000 UI I.M.
2. La azitromicina puede ser una opción terapéutica útil para el tratamiento de la sífilis primaria y secundaria. No obstante se está comunicando un aumento de las resistencias intrínsecas a este antibiótico y la existencia de fracasos terapéuticos.
3. Algunos autores recomiendan, una vez finalizado el anterior tratamiento, administrar una dosis semanal de penicilina benzatina 2.400.000 UI I.M. durante 3 semanas.
4. Pueden existir reacciones de hipersensibilidad cruzadas entre ambas.
5. Se han identificado mutaciones cromosómicas asociadas con resistencia a azitromicina y otros macrólidos por lo que la azitromicina no debiera ser utilizada como un fármaco de primera línea, y si se debe utilizar, se hará con precaución, y sólo cuando no es posible utilizar penicilina o doxiciclina.
6. La azitromicina no se debe utilizar en hombres que tienen sexo con hombre, en pacientes VIH o en mujeres embarazadas.
7. No se ha estudiado su eficacia en pacientes VIH ni en aquellos con sífilis terciaria.
8. En los pacientes VIH la monitorización deben ser más estrecha (3, 6, 9, 12 y 24 meses).

➤ **Sífilis primaria o secundaria:**

- Penicilina G benzatina<sup>7</sup>. El uso de dosis adicionales de penicilina o de otros antibióticos no mejora la eficacia del tratamiento<sup>88-90</sup>.
- Excepto en el caso de las mujeres embarazadas (ver sífilis en el embarazo), la alternativa terapéutica a la penicilina sería la doxiciclina<sup>90</sup>. En el momento actual, y debido a la aparición de cepas con mutaciones cromosómicas asociadas con resistencia a azitromicina y otros macrólidos, la azitromicina no debe ser utilizada como un fármaco de primera línea<sup>91</sup>.

➤ **Sífilis latente:**

- Sífilis latente precoz: penicilina G benzatina<sup>7</sup>. El empleo de dosis adicionales de penicilina o de otros antibióticos no mejora la eficacia del tratamiento<sup>88-90</sup>.
- Sífilis latente tardía o de duración desconocida: penicilina G benzatina<sup>1</sup>. En el caso de que el paciente no reciba su nueva dosis de penicilina 7 días después de la anterior, la experiencia clínica sugiere que un intervalo de 10-14 días entre las dosis puede ser aceptable antes de reiniciar la secuencia de inyecciones<sup>1</sup>. En las embarazadas esto no es aceptable por lo que si se retrasan en una dosis se debe hacer un retratamiento completo<sup>92</sup>.
- Excepto en el caso de las mujeres embarazadas (*ver sífilis en el embarazo*), la alternativa terapéutica a la penicilina sería la doxiciclina. La eficacia de esta pauta no ha sido evaluada en pacientes VIH.

➤ **Sífilis terciaria:**

- Penicilina G benzatina<sup>1</sup>. Previamente a su administración se debe descartar una neurosífilis. Algunos especialistas consideran que los pacientes con sífilis cardiovascular deben ser tratados como si fuera una neurosífilis.

- No existe información contrastada sobre las alternativas terapéuticas a la penicilina.

➤ **Neurosífilis y sífilis oftálmica:**

- Penicilina G sódica<sup>1</sup>.
- Si se puede asegurar el cumplimiento terapéutico, otra opción sería la penicilina G procaína junto con probenecid<sup>1</sup>.
- Dado que la duración de estas pautas es más cortas que las empleadas en la sífilis latente, algunos expertos recomiendan administrar, una vez finalizado el anterior tratamiento, una dosis semanal de penicilina benzatina durante 3 semanas<sup>1</sup>.
- En las mujeres embarazadas (*ver sífilis en el embarazo*) y en los alérgicos a la penicilina se recomienda la desensibilización y posterior tratamiento con penicilina. Excepto en las mujeres embarazadas, algunos datos sugieren la posibilidad de utilizar ceftriaxona<sup>93</sup> si bien es importante tener en cuenta que pueden existir reacciones de hipersensibilidad cruzadas.

➤ **Sífilis en el embarazo:**

La penicilina es el único tratamiento de elección, incluso en las alérgicas, por lo que si fuera éste el caso sería preciso hacer una desensibilización y tratamiento con penicilina<sup>1</sup>. En la sífilis primaria, secundaria o latente precoz, el uso de una dosis terapéutica adicional de penicilina benzatina (2.4 M UI) una semana después de la primera dosis de penicilina puede ser beneficioso en estas pacientes<sup>1</sup>. Cuando se deben administrar dosis repetidas de penicilina, no son aceptables los retrasos en la dosis de penicilina por lo que si se retrasan en una dosis se debe hacer un retratamiento completo<sup>92</sup>. No olvidar referir al recién nacido de madre con sífilis al pediatra para evaluar la actitud a seguir.

➤ **Reacción de Jarish-Herxheimer**

Es una reacción sistémica aguda que cursa con fiebre, cefalea, mialgias, entre otros síntomas, y que tiene lugar en las 24 horas posteriores al inicio del tratamiento de la sífilis<sup>1</sup>. Los pacientes deben ser advertidos sobre esta posibilidad. Suele ser más frecuente en la sífilis primaria y se debe a la destrucción masiva de treponemas. Se trata de un cuadro autolimitado que puede tratarse con antipiréticos. Las embarazadas con sífilis que son tratadas en la segunda parte del embarazo deben ser informadas de que pueden sufrir un parto prematuro o sufrimiento fetal aunque es poco frecuente<sup>1</sup>.

### ➤ **Tratamiento de las parejas sexuales**

Todos los contactos sexuales de una persona diagnosticada de sífilis primaria, secundaria o latente precoz deben ser evaluadas clínica y serológicamente, y tratadas según corresponda según las siguientes recomendaciones<sup>1</sup>.

- a) Contactos sexuales en los 90 días previos al diagnóstico de sífilis: Tratar como si fuera una sífilis precoz, incluso si la serología es negativa.
- b) Contactos sexuales hace >90 días: Tratar como si fuera una sífilis precoz si no hay disponibilidad serológica inmediata o si es incierta la posibilidad de seguimiento del contacto. Si la serología es negativa, no es preciso tratar. Si es positiva, actuar en consecuencia en base a la clínica, la serología y el estadio de la sífilis.
- c) Las parejas sexuales con contactos mantenidos en el tiempo de los pacientes con sífilis latente tardía deben ser evaluadas clínicamente y serológicamente para la sífilis, y tratados según proceda.
- d) Se hace preciso el seguimiento, por ser contactos de riesgo, de aquellas parejas que han mantenido una relación sexual hace >3 meses con una persona diagnosticada de sífilis primaria, hace >6 meses con una diagnosticada de sífilis secundaria, y hace 1 año con una diagnosticada de sífilis latente precoz.

### **5.5. Seguimiento**

A todo paciente con sífilis se le debe solicitar la serología del VIH y despistaje de otras ITS. Así mismo, a los pacientes con sífilis que tengan signos y/o síntomas que sugieran una enfermedad neurológica (afectación de pares craneales, meningitis, pérdida de la audición) u oftálmica (uveítis, neurorretinitis, neuritis óptica) se les debe realizar un análisis del LCR, un examen oftalmológico y una exploración otológica<sup>1</sup>.

### ➤ **Sífilis primaria y secundaria**

En los pacientes seronegativos se recomienda una evaluación clínica y serológica, 6 y 12 meses después del tratamiento<sup>1</sup>. En los VIH, a los 3, 6, 9, 12 y 24 meses<sup>1</sup>. Se debe considerar que un paciente tiene un fracaso terapéutico o una reinfección si 2 semanas después del tratamiento continúa con signos y/o síntomas o reaparecen, y además tienen un aumento de al menos 4 veces el título de anticuerpos no treponémicos. Dado que no es posible diferenciar un fracaso terapéutico de una reinfección, se debe evaluar el LCR y

retratar según los hallazgos del LCR<sup>1</sup>. También es indicativo de fracaso terapéutico la ausencia de una caída de al menos 4 veces el título en los test no treponémicos tras 6-12 meses de seguimiento. No obstante, hasta un 20% de los pacientes tratados no logra esta respuesta serológica hasta pasado un año<sup>88,95</sup>. El retratamiento se realizará con penicilina G benzatina (2,4 MUI I.M. semanal durante 3 semanas), a no ser que el estudio del LCR indique que se trata de una neurosífilis<sup>1</sup>.

#### ➤ **Sífilis latente**

En los paciente seronegativos se recomienda la realización de pruebas no treponémicas a los 6, 12 y 24 meses después del tratamiento<sup>1</sup>. En los pacientes VIH a los 3, 6, 9, 12 y 24 meses. Será precisa la realización de un estudio del LCR en aquellos pacientes que presenten: a) un aumento del título de las pruebas no treponémicas  $\geq 4$  veces mantenida durante  $>2$  semanas; b) un título inicial  $\geq 1:32$  que no disminuye por lo menos 4 veces en el plazo de 12-24 meses después del tratamiento, o c) presencia de signos y/o síntomas neurológicos atribuibles a la sífilis. Los pacientes con anomalías en el LCR deben ser tratados para la neurosífilis. Si el LCR es negativo, el paciente debe ser retratado. Si el examen del LCR descarta la neurosífilis, y los títulos serológicos no treponémicos no disminuyen, en especial en aquellos pacientes con títulos bajos ( $<1:8$ ), no sería precisa una nueva evaluación del LCR ni un retratamiento<sup>1</sup>. Se recomienda re-evaluar la serología VIH si fue negativa.

#### ➤ **Sífilis terciaria**

La información disponible sobre la evolución y seguimiento de estos pacientes es limitada.

#### ➤ **Neurosífilis**

La afectación del SNC puede ocurrir en cualquier etapa de la sífilis. Además, las alteraciones del LCR son frecuentes, incluso en ausencia de sintomatología neurológica<sup>1</sup>. Esto es especialmente importante en los pacientes VIH. En estos pacientes, la presencia de alteraciones en el LCR se asocia con un recuento de CD4  $\leq 350$  cel/mm<sup>3</sup> y/o un título de RPR  $\geq 1:32$ <sup>1</sup>. Sin embargo, en ausencia de signos y/o síntomas neurológicos este análisis del LCR suele ser normal. En los pacientes con un LCR patológico, con pleocitosis previa al inicio del tratamiento, hace que se deba re-evaluar el LCR cada 6 meses hasta lograr la total normalidad del mismo<sup>1</sup>. Este es el principal marcador de respuesta al tratamiento. Si tras el tratamiento el recuento celular en LCR no ha disminuido a los 6 meses, o si éste o los niveles de proteínas continúan elevadas 2 años después, se debe valorar un retratamiento. Los pacientes VIH tienen 2,5 veces menos probabilidades de normalizar los niveles de VDRL en LCR que los pacientes no infectados por VIH<sup>95</sup>. Además, esta normalidad en los niveles de

VDRL es 3,7 veces menor en aquellos con una cifra de linfocitos CD4  $\leq 200$  cél/mm<sup>84</sup>. Se desconoce si la falta de normalización en los niveles de VDRL en LCR traduce un fracaso terapéutico (15). En los pacientes inmunocompetentes, y en los VIH en TAR, la normalización del título de RPR en suero predice la normalización de los parámetros de LCR tras el tratamiento de la neurosífilis<sup>96</sup>.

## 5.6. Prevención

Los pacientes deben ser informados sobre las prácticas que reducen el riesgo de infección por sífilis y VIH<sup>1</sup>. En los pacientes infectados por el VIH sexualmente activos se recomienda, al menos, la realización anual de pruebas para su detección. Estos controles serán más frecuentes (cada 3-6 meses) en aquellos pacientes con múltiples parejas, que no utilizan medidas de protección en sus relaciones o que consumen drogas. Estos pacientes también deben ser sometidos a pruebas de detección de otras ITS<sup>1</sup>.

## Recomendaciones

1. *Siempre que esté disponible, se recomienda hacer microscopía de campo oscuro en chancros (A-II).*
2. *La PCR es una herramienta diagnóstica útil en úlceras cuando la serología es aun negativa, siendo su valor mayor en la confirmación del diagnóstico que en la exclusión del mismo (A-I).*
3. *El suero con una prueba de cribado positivo debe titularse mediante una prueba no treponémica VDRL/RPR (A-I).*
4. *Los pacientes con infección por el VIH deben ser tratados con el mismo régimen terapéutico que los pacientes seronegativos siendo la penicilina el tratamiento de elección (A-II).*
5. *En las embarazadas la penicilina es el tratamiento de elección, incluso en las alérgicas, por lo que si fuera preciso sería preciso hacer una desensibilización y tratamiento con penicilina (A-III).*
6. *La azitromicina no está indicada para el tratamiento de la sífilis primaria o secundaria, ni para pacientes con el VIH (A-II).*
7. *En todo paciente con clínica neurológica (signos y/o síntomas) y/o fracaso terapéutico está indicada la realización de una punción lumbar para descartar la posibilidad de neurosífilis (A-III).*

8. *A todos los pacientes con sífilis se les debe realizar un cribado para el despistaje de otras ITS, incluyendo el VIH (A-I).*
9. *En los pacientes sexualmente activos (en especial hombres que tienen sexo con hombres y personas con el VIH) se recomienda, al menos, la realización anual de pruebas para su detección (A-I).*

## 6. INFECCIÓN POR EL VIRUS DEL PAPILOMA HUMANO.

### 6.1. Introducción

El virus del papiloma humano (VPH) es un virus ADN sin cubierta que pertenece al género *Papillomavirus* dentro de la familia *Papillomaviridae*. Existen más de 100 genotipos del VPH, de los cuales unos 40 pueden infectar al ser humano por vía sexual mediante contacto directo con piel o mucosas, en el canal del parto o a través de fómites. Clasificamos al VPH según su localización en piel y mucosas y por su capacidad de oncogénesis en bajo, medio y alto riesgo.

La infección por VPH es la ITS más frecuente en el mundo y hasta tres cuartas partes de la población se infectará en algún momento por VPH. No obstante, en más del 80% de los casos la infección es transitoria aclarándose en los dos años siguientes. La persistencia de genotipos oncogénicos aumenta el riesgo de neoplasias, favorecido por otros factores como el tabaco o la coinfección por el VIH u otras ITS<sup>97</sup>. El cáncer de cérvix es una de las principales neoplasias en mujeres, asociada a la infección crónica por VPH, cuya incidencia ha disminuido gracias a la instauración de programas de cribado. Actualmente se está observando un incremento de neoplasias asociadas a VPH en otras localizaciones, como orofaringe y ano, de forma más marcada en los pacientes con infección por VIH<sup>98,99</sup>. Los pacientes con infección por VIH tienen una prevalencia mayor de infección por VPH, junto con una reducción en el aclaramiento del virus por la inmunosupresión<sup>100</sup>. Esto supone un aumento del riesgo de neoplasias en estos pacientes respecto a la población general<sup>101,102</sup>.

### 6.2. Clínica

La infección por el VPH suele ser asintomática. En un subgrupo de pacientes se pueden desarrollar condilomas acuminados anogenitales o neoplasias en diversas localizaciones: cérvix, vulva, vagina, ano, perineo, escroto, pene y región oro-faríngea.

Los condilomas o verrugas son lesiones benignas de distintas formas y tamaños, que pueden ser únicos pero habitualmente son múltiples. En un 90% están asociados a VPH 6 y

11<sup>98</sup>. No suelen dar clínica aparte de las molestias estéticas y psicológicas, aunque en ocasiones producen prurito, sangrado o dolor. La prevalencia en pacientes inmunodeprimidos es mayor<sup>100</sup>.

La papilomatosis respiratoria recurrente es la formación de verrugas predominantemente por VPH 6 y 11 en las vías aéreas superiores que puede provocar cambios en la voz y obstrucción en el paso aéreo. Es más frecuente en menores de 5 años (adquisición durante el parto)<sup>103</sup>.

Respecto a las neoplasias, debemos diferenciar:

- a) La neoplasia intraepitelial (HSIL; en algunas de las localizaciones no siempre relacionada con VPH), que es una displasia de alto grado que se considera lesión precursora del cáncer.
- b) El cáncer, que es un carcinoma de células escamosas y provoca síntomas que pueden variar en función de la localización. En las neoplasias, los genotipos más prevalentes son el 16,18 y 31 <sup>104,105</sup>.

### 6.3. Diagnóstico

La citología es la prueba que se emplea en el cribado de displasia cervical y anal por su bajo coste, y sencillez en su realización<sup>106</sup>. Inicialmente se usaba el Papanicolau cuya sensibilidad y especificidad para el diagnóstico de lesiones AIN2+ (Neoplasia intraepitelial anal de alto grado/HSIL) oscilaba entre 47-93% y 32- 50%, respectivamente<sup>107</sup>. Con respecto a la citología cervical las cifras eran parecidas para diagnosticar lesiones CIN2+ (neoplasia cervical intraepitelial de alto grado)<sup>108,109</sup>.

Actualmente se utiliza la citología en medio líquido como técnica de cribado, porque ofrece ventajas como evitar resultados artefactados, reducir la contaminación fecal bacteriana<sup>110</sup>, disminuir el tiempo de interpretación, y permitir llevar a cabo test moleculares como la PCR de VPH<sup>111</sup>. Pero debido a esta sensibilidad variable de la citología, determinados autores proponen en el cribado anal, asociar la PCR de VPH-AR a la citología en caso de que esta fuese normal, y así conseguir aumentar la sensibilidad diagnóstica para AIN2+ en pacientes VIH positivos HSH<sup>112</sup>, en seronegativos con citología de significado incierto<sup>113</sup>, en HSH VIH negativos<sup>114</sup> y en patología cervical en mujeres con ASCUS independientemente de la edad<sup>115</sup>. No obstante, la utilidad de la PCR de VPH-AR puede ser menor en poblaciones con alta prevalencia de infección por estos genotipos, como podrían ser los HSH infectados por el VIH.

Otros autores proponen como cribado de HSIL/cáncer de canal anal (CCA) directamente la anoscopia de alta resolución (AAR) por su coste/efectividad<sup>116</sup>. Por último, destacar el papel de otros marcadores biológicos subrogados en displasia como el P16, cuya detección en mucosa anal y cervical mejora la sensibilidad diagnóstica de genotipos de alto riesgo del VPH y HSIL<sup>117</sup>, aunque de momento no están contemplados en las guías de cribado. Respecto al despistaje de patología cervical en la población general, remitimos a las guías correspondientes<sup>118</sup>.

En cuanto al cribado de HSIL/CCA se recomienda: visualización del área perianal con toma de citología ciega y tacto ano-rectal; AAR en los casos con displasia en la citología, para localizar lesiones y tomar biopsia/s y decidir actitud a seguir. En aquellas unidades donde no se disponga de AAR, al menos se recomienda que una vez al año se pregunte por sintomatología anal, así como inspección ano-genital y tacto ano-rectal como despistaje de CCA<sup>119</sup>.

#### 6.4. Tratamiento

Existen diferentes alternativas en el tratamiento de las lesiones producidas por el VPH en mucosa anal y en cérvix/vagina/vulva. Hay que tener en cuenta que tratar los condilomas puede disminuir la infectividad pero no modifica la historia natural de la infección. Reseñar que el tratamiento del cáncer de las distintas áreas se escapa del objetivo de esta guía.

- a) **Exéresis quirúrgica:** En caso CIN2/CIN3 se recomienda electrocauterización (LEEP)<sup>120</sup>. El tratamiento sólo quirúrgico de HSIL anal es controvertido debido a una eficacia incompleta, frecuentes recidivas, y complicaciones asociadas<sup>121</sup>. En cuanto a la combinación de exéresis quirúrgica guiada con AAR y empleo de infrarrojos en pacientes con HSIL se han obtenido buenos resultados<sup>122</sup>.
- b) **Coagulación mediante infrarrojos:** es una técnica ambulatoria, indicada en el tratamiento de condilomas, y HSIL anal recurrente y multifocal<sup>123</sup>.
- c) **Electrocauterización con AAR:** es una técnica ambulatoria que se emplea en HSIL anal (localizada o extensa/multifocal)<sup>124-126</sup>. Con respuesta variable<sup>124</sup>, importante tasa de recidivas y el inconveniente de la formación de aerosoles de VPH<sup>126</sup>.

En cuanto a eficacia y seguridad, los infrarrojos y la electrocauterización son similares. Los efectos adversos más frecuentes son dolor y sangrado anal unos días.

- d) Fulguración con láser de CO<sub>2</sub>:** es una técnica ambulatoria indicada en pacientes con HSIL anal y alto riesgo quirúrgico, con peores resultados que las técnicas comentadas previamente en cuanto a tasa de curación, sobre todo en pacientes con lesiones extensas y seropositivos<sup>117</sup>.
- e) Crioterapia:** utilizada en condilomas externos e internos. Puede realizarse en la consulta. Produce dolor durante la aplicación e inflamación variable en la piel circundante. Se puede hacer durante el embarazo<sup>127</sup>.
- f) Tratamientos médicos** (tabla 13): pueden ser aplicados sin riesgo de estenosis o incontinencia, pero con el inconveniente de las recidivas, necesitan cursos largos y pueden producir fenómenos inflamatorios limitantes. Podrían representar una opción en lesiones extensas previo al tratamiento ablativo. Ninguno de ellos tiene indicación en ficha técnica para la displasia anal.
- Imiquimod: se emplea habitualmente en lesiones externas genitales y perianales, pero también puede emplearse como tratamiento de elección en HSIL anal multifocal o extensa, o como adyuvante con otras técnicas<sup>128</sup>.
  - Ácido tricloroacético y bicloroacético: ejerce efecto directo citotóxico mediante coagulación química de proteínas, siendo útil en el tratamiento de condilomas acuminados, teniendo en cuenta que hay que ser muy cuidadoso con su aplicación<sup>129</sup>.
  - Cidofovir: es un agente que ha demostrado eficacia en condilomas, HSIL anal<sup>130</sup> y en cáncer de cérvix combinado con quimioterapia<sup>131</sup>.
  - Podofilotoxina en solución al 0,5% o crema 0,15%, y Sinacatequinas para el tratamiento de los condilomas externos (tabla 13)

**Tabla 13. Tratamientos médicos de condilomas y HSIL anal**

|                            | <b>Imiquimod 5%</b>                               | <b>Podofilotoxina</b>              | <b>5-Fluoruracilo</b>                                                                                   | <b>Sinacatequinas</b>                  |
|----------------------------|---------------------------------------------------|------------------------------------|---------------------------------------------------------------------------------------------------------|----------------------------------------|
| <b>Condilomas externos</b> | Aprobado FDA                                      | Aprobado FDA                       | No aprobado por FDA                                                                                     | Aprobado FDA                           |
| <b>Eficacia</b>            | 51%                                               | 56%                                | 30-95%                                                                                                  | 56%                                    |
| <b>Posología</b>           | 1 aplic/día, 3 días/sem, 6-8 semanas              | 2 aplic/día, 3 días/sem, 4 semanas | 2 aplic/día, 4 semanas                                                                                  | 3 aplic/día, 7 días/semana, 16 semanas |
| <b>Condilomas internos</b> | No aprobado                                       | No aprobado                        | No aprobado                                                                                             | No aprobado                            |
| <b>HSIL anal</b>           | No aprobado                                       | ---                                | No aprobado                                                                                             | ---                                    |
| <b>Eficacia</b>            | 60%                                               | ---                                | 40%                                                                                                     | ---                                    |
| <b>Posología</b>           | 1 aplic/día, 3 días/sem, 16 semanas               | ---                                | 0.25 g, 2 aplic/día 5 días, descansando 9 días, en total 16 semanas<br>ó<br>1 g, 2 aplic/sem 16 semanas | ---                                    |
| <b>Forma de aplicación</b> | Por la noche; en la mañana lavar con agua y jabón | ---                                | No necesario lavar                                                                                      | ---                                    |
| <b>Efectos adversos</b>    | ++                                                | +++                                | ++                                                                                                      | +                                      |

### 6.5. Seguimiento

En cuanto al seguimiento de la displasia cervical en mujeres inmunocompetentes consultar la guía de práctica clínica<sup>118</sup> y el apartado 2.2 de este documento.

En mujeres VIH positivas y adolescentes con VIH, ver apartado 2.2 de éste documento.

Respecto al seguimiento de lesiones displásicas de mucosa anal, se recomienda hacer en HSH con infección por el VIH anualmente, y sería deseable al menos cada 3 años en HSH, VIH positivos, mujeres con patología cervical y pacientes con condilomas<sup>119</sup>, condicionado a la disponibilidad de recursos (AAR) para realizarlo. Figura 1.

## 6.6. Prevención

Idealmente deberíamos realizar prevención primaria. Esto significa uso de preservativo, que aunque no anula la posibilidad de contagio sí la reduce, y vacunación a ser posible antes del inicio de las relaciones sexuales<sup>132</sup>.

Actualmente existen tres vacunas frente al VPH: la bivalente (VPH 16 y 18, asociados al 70% de los cánceres de cérvix), la tetravalente (VPH 6, 11, 16 y 18, los dos primeros asociados a un 90% de las verrugas anogenitales) y la nonavalente, recientemente aprobada pero aún no disponible en España (VPH 6, 11, 16, 18, 31, 33, 45, 52, 58, con una cobertura de un 20% adicional de casos de cáncer de cérvix respecto a las anteriores)<sup>133</sup>.

Las tres vacunas están indicadas para la prevención de cáncer de cérvix y lesiones pre-cancerosas de cérvix, vagina y vulva; la tetravalente y nonavalente además estarían indicadas para la prevención de condilomas, lesiones pre-cancerosas y cáncer a nivel anal<sup>134</sup>.

En España, el calendario de vacunación contempla vacunar sólo a las niñas, a los 12 años (2 dosis)<sup>135</sup>. La Asociación Española de Pediatría refiere que “las mujeres de 13 a 26 años no vacunadas son un grupo de alta prioridad de vacunación y podrían beneficiarse de la misma” Algunos países como Estados Unidos, Canadá, Australia, Austria o Suiza indican también la vacuna tetravalente a los varones.

Existen poblaciones en las que el riesgo de patología por VPH está aumentado. Éstas incluyen la infección por el VIH, los HSH o pacientes con tratamiento inmunosupresor crónico. En éstas poblaciones sería apropiado valorar los potenciales beneficios de la vacunación frente al VPH. En Estados Unidos la recomendación de vacunación en el varón se extiende hasta los 26 años de edad en HSH e inmunosuprimidos<sup>136-138</sup>. En estos pacientes la pauta recomendada es de 3 dosis.

Se ha estudiado de forma retrospectiva la efectividad de la vacunación en la prevención de recidivas de displasia de alto grado tras el tratamiento, tanto a nivel cervical<sup>136</sup> como a nivel anal en HSH<sup>138</sup> con buenos resultados. En la actualidad están en marcha ensayos para evaluar la utilidad de la vacunación en este escenario (clinicaltrials.gov: NCT00941889, NCT01928225, NCT02087384).

Todo lo anterior sugiere que poblaciones de alto riesgo como los HSH y las personas con el VIH podrían beneficiarse de la vacunación frente al VPH, hasta los 26 años de edad. Por ello, este Panel recomienda la revisión de la utilización de la vacuna del VPH en grupos de alto riesgo hasta los 26 años, como también sugieren diferentes Agencias Internacionales<sup>139-</sup>

140.

## Recomendaciones

1. En cuanto al cribado de HSIL/CCA se recomiendan 3 tres pasos: visualización del área perianal con toma de citología ciega y tacto rectal; AAR en los casos con displasia en la citología, para localizar lesiones y tomar biopsia/s y tratamiento local y seguimiento de las lesiones HSIL **(B-II)**.
2. El tratamiento de elección para condilomas externos comprende Podofilotoxina o Sinecatequinas o Imiquimod **(A-II)**.
3. Para el tratamiento de displasia de alto grado anal, se recomienda generalmente la electrocoagulación/infrarrojos, aunque existen diferentes opciones, incluso aplicables por el propio paciente **(B-II)**.

**Figura 1. Algoritmo de diagnóstico y seguimiento de la displasia anal. Adaptada de la guía de GeSIDA<sup>23</sup>**

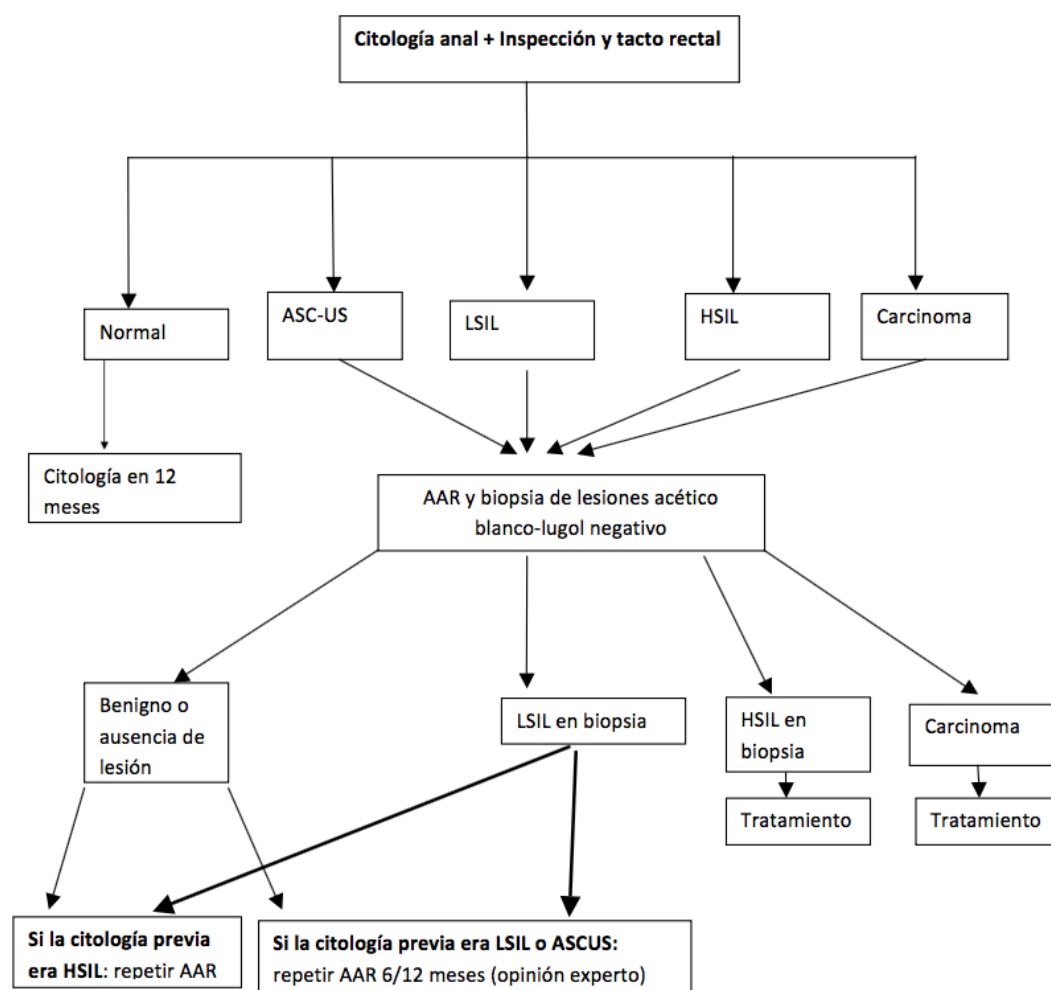

## 7. ABORDAJE DE LAS INFECCIONES DE TRANSMISIÓN SEXUAL EN NIÑOS Y ADOLESCENTES

### 7.1. Niños

La detección de una ITS en un niño prepuberal requiere un estudio pormenorizado, en el que hay que descartar en primer lugar y de forma exhaustiva un abuso sexual, aunque otras formas de transmisión como la perinatal o la accidental, por auto o heteroinoculación, tienen que ser consideradas<sup>141</sup>.

La prevalencia de las ITS en niños que han sufrido un abuso sexual depende del tipo de abuso, de la prevalencia de ITS en los adultos y de la madurez del niño<sup>141</sup>. En la tabla 14 se recogen las prevalencias frente a cada una de las ITS observadas en niños víctimas de abuso sexual y se detallan las características más importantes que ayudan a una interpretación adecuada del modo de infección en caso de detección de una ITS en niños prepuberales<sup>142</sup>.

La evaluación de las ITS en los niños prepuberales víctimas de un posible abuso sexual se hará de forma individualizada, en base a los datos obtenidos de la historia clínica que incluirá una detallada exploración física<sup>141</sup>.

Existen peculiaridades diagnósticas de las ITS en los niños prepuberales. En niñas, no se realizan habitualmente tomas endocervicales, sino tomas de muestra vulvar y vaginal con torunda<sup>144</sup>. En la actualidad se continúan recomendando las técnicas de cultivo para *N. gonorrhoeae* (en muestra vaginal, uretral, ano-rectal y faríngea) y *C. trachomatis* (en muestra vaginal, en muestra ano-rectal y en muestra de meato uretral en caso de supuración uretral)<sup>141,144</sup>. La dificultad de acceso a métodos de cultivo, en particular frente a *C. trachomatis* y la alta sensibilidad de las técnicas de detección de ácidos nucleicos (TAAN) en orina frente a *N. gonorrhoeae* y *C. trachomatis* en adultos, ha conducido a una creciente aceptación de estas técnicas en niños<sup>145</sup>. En la actualidad se aceptan las TAAN en orina y muestras vaginales para *C. trachomatis* y *N. gonorrhoeae* en niñas prepúberes. Sin embargo, no hay estudios que avalen el uso de estas técnicas en muestras de orina en niños prepúberes ni en localizaciones extragenitales como el recto y faringe en niñas y niños<sup>144</sup>. No existe tampoco evidencia suficiente para recomendar el uso de TAAN en el diagnóstico de *T. vaginalis* en niños prepúberes<sup>144,145</sup>.

Debido a las implicaciones médico legales se recomienda que todas las muestras positivas por TAAN sean conservadas adecuadamente en el laboratorio por si fueran necesarias nuevas determinaciones<sup>144,145</sup>.

En caso de abuso sexual o sospecha del mismo se solicitará la intervención de los miembros de los dispositivos de atención frente a la violencia y abuso al menor con el fin de asegurar:

- a) que el menor recibe no sólo una adecuada asistencia médica sino también psicológica y social (con la participación de servicios sociales y la derivación del paciente a psicólogos especializados),
- b) que se notifica adecuadamente a la justicia el abuso o la sospecha del mismo, que se utilizan las vías disponibles para poner en conocimiento de los hechos al médico forense por si es preciso la toma de muestras, y finalmente que se asegura de forma continuada la protección del menor.

No se recomienda de forma general el tratamiento empírico frente a las ITS en todos los niños, pero puede ser valorado en algunos casos según el riesgo de transmisión y tras la recogida adecuada de muestras microbiológicas<sup>4</sup>. Se valorará la indicación de la profilaxis postexposición frente a VIH y VHB<sup>6</sup>. El CDC recomienda además iniciar o completar la vacunación frente al VPH en estas niñas y niños a partir de los 9 años de edad<sup>4</sup>. En la tabla 15 se recogen las recomendaciones de tratamiento específicas frente a cada una de las ITS<sup>141,144,146</sup>.

**Tabla 124. Asociación entre ITS y abuso sexual en niños prepuberales**

|                       | Prevalencia de ITS tras abuso sexual en niños. | Comentario <sup>141,145</sup>                                                                                                                                                                                                                                                                                     |
|-----------------------|------------------------------------------------|-------------------------------------------------------------------------------------------------------------------------------------------------------------------------------------------------------------------------------------------------------------------------------------------------------------------|
| <i>N. gonorrhoeae</i> | 0.7-3.7%                                       | En niños prepúberes, el abuso sexual es el modo más probable de transmisión de la infección por <i>N.gonorrhoeae</i> .*                                                                                                                                                                                           |
| <i>C. trachomatis</i> | 0.7-3.1%                                       | El contacto sexual con penetración es el modo más probable de transmisión en el caso de un niño prepuberal con infección genital por <i>C.trachomatis</i> .*                                                                                                                                                      |
| <i>T.vaginalis</i>    | 0.5-5.9%                                       | Los estudios publicados sugieren que el abuso sexual es una forma probable de infección por <i>T. vaginalis</i> en las niñas. *                                                                                                                                                                                   |
| VIH                   | <1%                                            | En un niño con infección por VIH, se debe excluir en primer lugar la infección perinatal o por hemoderivados. Una vez excluidas, el abuso sexual es la forma más probable de transmisión.                                                                                                                         |
| Sífilis               | <1%                                            | En todo niño diagnosticado de sífilis, la historia clínica, el examen físico y la serología frente a sífilis en el niño y en la madre ayudarán a determinar si la infección es congénita o adquirida. En caso de una infección adquirida, el abuso sexual es el modo más probable de transmisión de la sífilis. # |
| VPH                   | 3.1%                                           | El abuso sexual debe ser considerado en todo niño que presenta verrugas genitales.                                                                                                                                                                                                                                |
| VHS                   | <5%                                            | El abuso sexual debe ser considerado en todo niño que presenta lesiones genitales por VHS. Considerar también la autoinoculación como forma de transmisión.                                                                                                                                                       |

\* Sin embargo, no se conoce con exactitud la edad a la que se puede excluir la posibilidad de una transmisión vertical. # Se debe excluir también la transmisión por hemoderivados

Tabla 15. Profilaxis y tratamiento de ITS recomendados en niños y adolescentes

| Tratamiento recomendado de primera elección en niños y adolescentes |                                                                                                                                                                                                                                                            |                                                                                                                                                                                                                                                                                                                                   |
|---------------------------------------------------------------------|------------------------------------------------------------------------------------------------------------------------------------------------------------------------------------------------------------------------------------------------------------|-----------------------------------------------------------------------------------------------------------------------------------------------------------------------------------------------------------------------------------------------------------------------------------------------------------------------------------|
| <i>C. trachomatis</i>                                               | <b>Niños con peso &lt;45 kg:</b><br><br>Eritromicina 50 mg/kg/día cada 6 horas vía oral durante 14 días.<br><br>No existen datos de la dosis óptima ni de la eficacia de azitromicina para infecciones por <i>C.trachomatis</i> en niños con peso < 45 kg. | <b>Niños con peso ≥45 kg:</b><br><br>Azitromicina 1 gramo vía oral en dosis única ó<br>Doxiciclina 100 mg dos veces al día vía oral durante 7 días (en el caso de niños mayores de 8 años)                                                                                                                                        |
|                                                                     | Se recomienda confirmación de cura con prueba microbiológica a las 2 semanas de finalizar el tratamiento.                                                                                                                                                  |                                                                                                                                                                                                                                                                                                                                   |
| <i>N. gonorrhoeae</i>                                               | <b>Infección gonocócica no complicada (vulvovaginitis, cervicitis, uretritis, faringitis o proctitis) en niños con peso ≤45 kg:</b><br><br>Ceftriaxona 25-50 mg/kg IV o IM dosis única (dosis máxima IM 125 mg)                                            | <b>Infección gonocócica no complicada (vulvovaginitis, cervicitis, uretritis, faringitis o proctitis) en niños con peso &gt;45 kg:</b><br><br>Ceftriaxona 250 mg/kg IM dosis única con azitromicina 1 gramo vía oral en dosis única ó<br>Cefixima 400 mg vía oral en dosis única con azitromicina 1 gramo vía oral en dosis única |
|                                                                     | <b>Artritis o bacteriemia gonocócica en niños con peso ≤45 kg:</b><br><br>Ceftriaxona 50 mg/kg (dosis máxima: 1 g) IM o IV en dosis única por 7 días.                                                                                                      | <b>Artritis o bacteriemia gonocócica en niños con peso &gt;45 kg:</b><br><br>Ceftriaxona 1 gramo IM o IV en dosis única diaria por 7 días.                                                                                                                                                                                        |
|                                                                     | Se recomienda reevaluar a estos pacientes tras 3-7 días de completar tratamiento para asegurar respuesta clínica (riesgo de resistencias a gonococo).                                                                                                      |                                                                                                                                                                                                                                                                                                                                   |
| <i>T.vaginalis</i>                                                  | <b>Tratamiento en niños:</b><br><br>Metronidazol 15 mg/kg/día cada 8 horas vía oral durante 7 días.                                                                                                                                                        | <b>Tratamiento en adolescentes:</b><br><br>Metronidazol 2 gramos vía oral en dosis única ó<br>Metronidazol 500 mg dos veces al día durante 7 días<br><br>No deben consumirse bebidas ni medicamentos que contengan alcohol durante el tratamiento con metronidazol.                                                               |
| Sífilis                                                             | Las recomendaciones de la penicilina G y la duración del tratamiento de la sífilis adquirida en paciente inmunocompetente varían dependiendo de la fase de la enfermedad y de las manifestaciones clínicas.                                                |                                                                                                                                                                                                                                                                                                                                   |

|                                                                   |                                                                                                                                                                                                                                                                                                                                                                                                                                                                                                                                                                                                                                                                                                                       |                                                                                                                                                                                                                                                                                                                                                                             |
|-------------------------------------------------------------------|-----------------------------------------------------------------------------------------------------------------------------------------------------------------------------------------------------------------------------------------------------------------------------------------------------------------------------------------------------------------------------------------------------------------------------------------------------------------------------------------------------------------------------------------------------------------------------------------------------------------------------------------------------------------------------------------------------------------------|-----------------------------------------------------------------------------------------------------------------------------------------------------------------------------------------------------------------------------------------------------------------------------------------------------------------------------------------------------------------------------|
|                                                                   | <p><b>- Sífilis primaria, secundaria y latente precoz:</b></p> <p>Penicilina G benzatina 50.000 U/kg IM en dosis única (dosis máxima 2.4 millones U)</p> <p><b>- Sífilis latente tardía o sífilis latente de duración desconocida:</b></p> <p>Penicilina G benzatina 50.000 U/kg IM en tres dosis con intervalos de una semana (dosis máxima 2.4 millones U y dosis máxima total 7.2 millones U)</p> <p><b>- Neurosífilis:</b></p> <p>Penicilina G cristalina acuosa 200.000 a 300.000 U/kg/día I.V cada 4-6 horas durante 10 a 14 días (dosis máxima 18-24 millones U/día)</p> <p>En caso de sífilis congénita, se advierte al lector que las pautas pueden diferir y se recomienda consultar guías específicas.</p> |                                                                                                                                                                                                                                                                                                                                                                             |
| VPH                                                               | <p>Se recomienda un período de observación por un mínimo de tres meses tras el diagnóstico, a menos que el paciente presente síntomas de dolor, sangrado o irritación.</p> <p>El tratamiento recomendado inicialmente es la crioterapia. Valorar el tratamiento quirúrgico en caso de no respuesta.</p> <p>La podofilotoxina 0.5% e imiquimod 5% no están autorizados por ficha técnica en niños, aunque han sido utilizados en caso de no respuesta como terapia <i>off label</i>.</p>                                                                                                                                                                                                                               |                                                                                                                                                                                                                                                                                                                                                                             |
| VHS                                                               | <p><b>Tratamiento del primer episodio en niños:</b></p> <p>Aciclovir suspensión 80 mg/kg/día cada 6 horas vía oral, sin exceder la dosis de adultos (1000-1200 mg/día)</p>                                                                                                                                                                                                                                                                                                                                                                                                                                                                                                                                            | <p><b>Tratamiento del primer episodio en adolescentes:</b></p> <p>- Aciclovir 400 mg, tres veces al día vía oral durante 7-10 días ó</p> <p>- Aciclovir 200 mg, cinco veces al día vía oral durante 7-10 días ó</p> <p>- Valaciclovir* 500mg dos veces al día vía oral durante 7-10 días ó</p> <p>- Famciclovir** 250 mg, tres veces al día vía oral durante 7-10 días.</p> |
|                                                                   | <p>*El uso de valaciclovir con esta indicación no está autorizado en niños menores de 12 años.</p> <p>**El uso de famciclovir con esta indicación no está autorizado en menores de 18 años.</p>                                                                                                                                                                                                                                                                                                                                                                                                                                                                                                                       |                                                                                                                                                                                                                                                                                                                                                                             |
| <b>Profilaxis recomendada en niños y adolescentes<sup>6</sup></b> |                                                                                                                                                                                                                                                                                                                                                                                                                                                                                                                                                                                                                                                                                                                       |                                                                                                                                                                                                                                                                                                                                                                             |
| VIH                                                               | <p><b>Niños &lt; 12 años</b></p> <p>Zidovudina (120 mg/m<sup>2</sup> cada 8 horas o 4 mg/kg/12h) + Emtricitabina (6 mg/kg/24h) +Lopinavir/ritonavir (230-300 mg/m<sup>2</sup> cada 12 horas).</p>                                                                                                                                                                                                                                                                                                                                                                                                                                                                                                                     | <p><b>Niños ≥ 12 años</b></p> <p>Tenofovir + Emtricitabina + Raltegravir</p> <p>TDF (245 mg) y FTC (200 mg) se administrarán una vez al día. Se pueden administrar coformulados (TDF/FTC) en un sólo comprimido al</p>                                                                                                                                                      |

|     |                                                                                                                                                                                                                                                                                                                                                                                                                                        |                                                                                                                                                                                                                                                                             |
|-----|----------------------------------------------------------------------------------------------------------------------------------------------------------------------------------------------------------------------------------------------------------------------------------------------------------------------------------------------------------------------------------------------------------------------------------------|-----------------------------------------------------------------------------------------------------------------------------------------------------------------------------------------------------------------------------------------------------------------------------|
|     | Existen preparados en solución de los fármacos. En el caso de niños mayores que alcancen dosis completas (dosis de adolescentes) se pueden administrar comprimidos/cápsulas siempre que puedan ingerirlos adecuadamente. Se recomienda que la profilaxis postexposición con estos tres fármacos se inicie lo antes posible, y siempre en las primeras 72 horas tras el contacto. Se recomienda mantener la profilaxis durante 28 días. | día. RAL (400 mg) comprimidos se administra dos veces al día. Se recomienda que la profilaxis postexposición con estos tres fármacos se inicie lo antes posible, y siempre en las primeras 72 horas tras el contacto. Se recomienda mantener la profilaxis durante 28 días. |
| VHB | En caso de que el niño no esté bien vacunado, o esté vacunado pero presente respuesta inadecuada (anti-HBs < 10 mUI/ml), se recomienda vacunación e inmunoglobulina específica frente al VHB por vía IM, con inicio a ser posible en las primeras 72 h.                                                                                                                                                                                |                                                                                                                                                                                                                                                                             |

## 7.2. Adolescentes

El inicio de las relaciones sexuales a edad más temprana, las promiscuidad y uso irregular de métodos de barrera, son causa de alta tasa de prevalencia de muchas ITS en la adolescencia y en juventud. Además influye la prevalencia de ITS en la población, el tipo de práctica sexual, el uso de drogas o alcohol y el tiempo transcurrido desde la primera relación sexual<sup>8</sup>. Los adolescentes también pueden contraer ITS tras sufrir abuso sexual<sup>148</sup>.

Estos comportamientos de riesgo en la adolescencia pueden relacionarse con enfermedades en el adulto que podían haberse prevenido<sup>149</sup>.

Los adolescentes son más susceptibles a la infección por la inmadurez del tracto genital<sup>147</sup>. En pacientes sexualmente activas existe riesgo aumentado de infección por *Chlamydia trachomatis* (CT) y *Neisseria gonorrhoeae* (GC) y una exposición precoz a VPH incrementa el riesgo de displasias cervicales. Las implicaciones futuras de las ITS en el aparato genital interno de los adolescentes incluyen esterilidad y dolor pélvico crónico. Por otro lado, algunas ITS pueden incrementar el riesgo de infección por VIH (herpes, sífilis)

Es necesario un acceso fácil a los Servicios de Salud o a los Centros Municipales de Planificación Familiar (localizables por internet o en el teléfono de información al ciudadano de cada comunidad) para prevenir tanto ITS como gestaciones no deseadas (posibilidad de anticoncepción postcoital dentro de las 48-72 horas tras relación), y garantizarles confidencialidad para crear un ambiente de confianza que permita explorar otras áreas (amigos, redes sociales y sexuales, posibilidad de abuso sexual). Los profesionales sanitarios (pediatra, médico de familia, ginecólogo) debemos asesorarles frente a conductas sexualmente seguras y estrategias de prevención/reducción de riesgos<sup>150</sup> (abstinencia, retraso de inicio de relaciones sexuales, disminución de promiscuidad, métodos de barrera), así como frente a conductas socialmente seguras (no drogas, no alcohol), y aprovechar la consulta para formarles en signos de alarma de ITS<sup>1</sup>. Entre los 13 y 16 años el médico valorará el grado de madurez del menor, pudiendo catalogarle de “menor maduro; pudiendo el menor, en este caso, tanto aceptar el tratamiento como decidir si se informa o no a su familia.

Un adolescente puede tener una ITS de forma asintomática, o tener dolor abdominal, flujo vaginal, secreción u ardor uretral en varones, úlceras, lesiones y verrugas.

El cribado está recomendado cuando la historia sexual del adolescente lo requiera (prácticas de riesgo,..) o siempre que aparezcan signos o síntomas que pudieran ser causados por una ITS<sup>141</sup>. En estos casos la recomendación de revisión podría ser anual. Ante un diagnóstico de ITS es muy importante la notificación a la pareja<sup>147</sup>.

Los test recomendados<sup>141</sup> incluirían, además de serología para VIH, VHC, VHB y sífilis, los recogidos en la tabla 16.

**Tabla 136. Test recomendados para estudio de ITS en adolescentes**

|                                       |                                                                    |                                                                                                                                                     |
|---------------------------------------|--------------------------------------------------------------------|-----------------------------------------------------------------------------------------------------------------------------------------------------|
| <b>Mujeres adolescentes</b>           | Hisopos endocervicales (si toleran espéculo)                       | Cultivo GC<br>TAAN CT+/-GC<br>Cultivo CT si es posible<br>Citología y detección VPH<br>Si síntomas: Cultivo de TV, vaginosis bacteriana o candidas. |
| <b>Varones adolescentes</b>           | Hisopos uretrales (si secreción uretral recoger del meato uretral) | Estudio microscópico de la secreción<br>Cultivo de GC<br>Cultivo de CT si es posible                                                                |
| <b>Mujeres y varones adolescentes</b> | Análisis orina                                                     | Si no es posible determinación vaginal/uretral.<br>Detectar GC y CT                                                                                 |
|                                       | Hisopo rectal                                                      | En relaciones anales: TAAN para CT y GC,<br>Cultivo de GC y cultivo de CT, si es posible                                                            |
|                                       | Hisopo faríngeo                                                    | Si práctica sexual oral, estudiando lo mismo que en vía rectal                                                                                      |
| <b>Úlceras y ampollas genitales</b>   |                                                                    | Cultivo o TAAN para VHS<br>Cultivo de bacterias<br>Microscopio en campo oscuro o PCR sífilis.                                                       |
| <b>Verrugas genitales</b>             |                                                                    | Estudio VPH                                                                                                                                         |

Los CDC<sup>1</sup> no recomiendan usar espéculo en estudio de ITS en las adolescentes, salvo dolor pélvico, cuerpo extraño vaginal o cribado cervical. Recomiendan cribado de rutina anual para CT y GC en las mujeres sexualmente activas <25 años, considerando el estudio en varones sexualmente activos de población con alta prevalencia de CT y GC (homosexuales, centros de adolescentes,...) En el adolescente asintomático no está recomendado el estudio de ciertas ITS (sífilis, tricomoniasis, vaginosis bacteriana, VHS, VPH, VHA y VHB), salvo en homosexuales. El estudio de VIH y sífilis se realizará anualmente en población de riesgo. ACOG recomienda cribado de cuello uterino a los 21 años.

Se recomienda la vacunación contra VPH, dentro del calendario vacunal y antes del inicio de las relaciones sexuales; no asociándose esta vacunación con un incremento en las conductas

de riesgo por la percepción errónea de que evita todas las ITS<sup>151</sup>. Se recomienda vacunación de VHB en caso de no vacunación previa. La vacunación VHA se puede ofrecer a los adolescentes y los adultos jóvenes que no la hayan recibido previamente, estando indicada en grupos de riesgo (promiscuidad, homosexuales, UDVP)<sup>152</sup>.

## Recomendaciones

1. *La detección de una ITS en un niño prepuberal requiere un estudio pormenorizado, en el que hay que descartar en primer lugar y de forma exhaustiva un abuso sexual. (A-II).*
2. *En caso de abuso sexual o sospecha del mismo se debe asegurar la protección adecuada del menor así como la notificación adecuada del caso a las autoridades judiciales. (A-III).*
3. *Los profesionales de la salud que atienden a los adolescentes deben integrar la educación sexual en la práctica clínica. Se recomienda aconsejar a los adolescentes sobre los comportamientos sexuales que se asocian con un mayor riesgo de contraer ITS y educar a los pacientes sobre las estrategias de prevención de riesgos asociados a las mismas. (A-II).*
4. *El cribado está recomendado cuando la historia sexual del adolescente lo justifique o siempre que aparezcan signos o síntomas que pudieran ser causados por una ITS. (B-II).*

## REFERENCIAS

1. Workowski KA, Bolan GA; Centers for Disease Control and Prevention. Sexually transmitted diseases treatment guidelines. *MMWR Recomm Rep* 2015; 64(RR-03):1-137.
2. Anderson C, Gallo MF, Hylton-Kong T, et al. Randomized controlled trial on the effectiveness of counseling messages for avoiding unprotected sexual intercourse during sexually transmitted infection and reproductive tract infection treatment among female sexually transmitted infection clinic patients. *Sex Transm Dis* 2013;40:105–10.
3. O'Connor EA, Lin JS, Burda BU, et al. USPSTF: behavioral sexual risk-reduction counseling in primary care to prevent sexually transmitted infections. *Ann Intern Med* 2014;161:874–83.
4. LeFevre ML. USPSTF: behavioral counseling interventions to prevent sexually transmitted infections. *Ann Intern Med* 2014;161:894–901.
5. Documento de Consenso del Grupo de Estudio del Sida (GESIDA)/Plan Nacional sobre el Sida (PNS) sobre las infecciones de transmisión sexual en pacientes con infección por el VIH. *Enferm Infecc Microbiol Clin*.2011;29(4):286.e1–286.e19.

6. Falasinnu T, Gilbert M, Hottes TS, Gustafson P, Ogilvie G, Shoveller J. Predictors identifying those at increased risk for STDs: a theory-guided review of empirical literature and clinical guidelines. *Int J STD AIDS*. 2015 Oct; 26(12):839-51.
7. Canadian Guidelines on Sexually Transmitted Infections. Disponible en: <http://www.phac-aspc.gc.ca/std-mts/sti-its>
8. Brook G, Bacon L, Evans C, McClean H, Roberts C, Tipple C et al. Clinical Effectiveness Group. British Association for Sexual Health and HIV. 2013 UK national guideline for consultations requiring sexual history taking. *Int J STD & AIDS* 2014; 25:391-404;
9. Ghanem, K, Tuddenham, S. Screening for sexually transmitted infections. *UptoDate*. Disponible en: <http://www.uptodate.com/contents/screening-for-sexually-transmitted-infections> (Acceso: 20 de abril de 2016)
10. Ministerio de Sanidad, Servicios Sociales e Igualdad, Plan Nacional sobre Sida, Guía de recomendaciones para el diagnóstico precoz de VIH en el ámbito sanitario, 2014. Disponible en: <http://www.msssi.gob.es/ciudadanos/enfLesiones/enfTransmisibles/sida/docs/GuiaRecomendacionesDiagnosticoPrecozVIH.pdf>
11. Aznar J, Blanco MA, Lepe JA, Otero L, Vázquez F. Diagnóstico microbiológico de las infecciones de transmisión sexual y otras infecciones genitales. 24. Vázquez Valdés F (coordinador). Recomendaciones de la Sociedad Española de Enfermedades Infecciosas y Microbiología Clínica. Cercenado E, Cantón R (editores). Sociedad Española de Enfermedades Infecciosas y Microbiología Clínica (SEIMC). 2007.
12. Aguilera Guirao A, Álvarez Estévez M, García García F, Reina González G, Rodríguez Martín C. Diagnóstico microbiológico de la infección por el VIH. 6a. García García F. (coordinador). Procedimientos en Microbiología Clínica. Cercenado Mansilla E, Cantón Moreno R (editores). Sociedad Española de Enfermedades Infecciosas y Microbiología Clínica (SEIMC). 2014
13. Aguilera Guirao A, Alonso Fernández R, Córdoba Cortijo J, Fuertes Ortiz de Urbina A. Diagnóstico microbiológico de las hepatitis víricas. 50. Alonso Fernández R (coordinador). Procedimientos en Microbiología Clínica. Cercenado Mansilla E, Cantón Moreno R (editores). Sociedad Española de Enfermedades Infecciosas y Microbiología Clínica (SEIMC). 2014.
14. González V, Fernández G, Dopico E, Margall N, Esperalba J, Muñoz C et al. Evaluation of the Vitros Syphilis TPA Chemiluminescence Immunoassay as a first –line method for reverse syphilis screening. *J Clin Microbiol*, 2015; 53: 1361-1364.
15. Guía de práctica clínica sobre infecciones de transmisión sexual. GPC-ITS. Amb la col·laboració del Centre d'Estudis Epidemiològics sobre les Infeccions de Transmissió Sexual i Sida de Catalunya (CEEISCAT) i el Centre de Investigació Biomèdica en Red de Epidemiologia y Salud Pública (CIBERESP). 1ª edición 2009. Disponible en: <http://www.gencat.cat/salut>
16. Oncoguía SEGO: Prevención del cáncer de cuello de útero. Guías de práctica clínica en cáncer ginecológico y mamario. Publicaciones SEGO, Octubre 2014 (ISBN: 978-84-612-7418-2 - Vol. 9). Disponible en: <https://www.ocez.net/archivos/vocalia/313-prevencion-2014.pdf>
17. Moscicki AB, Ellenberg JH, Crowley-Nowick P, Daragh TM, Xu J, Fahrat S. Risk of high-grade squamous intraepithelial lesion in HIV-infected adolescents. *J Infect Dis* 2004;190:1413–21.
18. Gynecologic care for women and adolescents with human immunodeficiency virus, Practice Bulletin No.167. American College of Obstetricians and Gynecologists. *Obstet Gynecol* 2016;128:e89-110.
19. Keller MJ, Burk RD, Xie X, Anastos K, Massad LS, Minkoff H, et al. Risk of cervical precancer and cancer among HIV-infected women with normal cervical cytology and no evidence of oncogenic HPV infection. *JAMA* 2012;308:362–9.
20. Harris TG, Burk RD, Palefsky JM, Massad LS, Bang JY, Anastos K, et al. Incidence of cervical squamous intraepithelial lesions associated with HIV serostatus, CD4 cell counts, and human papillomavirus test results. *JAMA* 2005;293:1471–6.
21. Cervical cancer screening and prevention. Practice Bulletin No. 168. American College of Obstetricians and Gynecologists. *Obstet Gynecol* 2016;128:e111-30.
22. Brookmeyer KA, Hogben M, Kinsey K. The Role of Behavioral Counseling in Sexually Transmitted Disease Prevention Program Settings. *Sex Transm Dis* 2016; 43, Supplement 1: S102-S112.
23. Patel P, Bush T, Mayer K, Milam J, Richardson J, Hammer J et al. for the SUN Study Investigators. Routine Brief Risk-Reduction Counseling With Biannual STD Testing Reduces

- STD Incidence Among HIV-Infected Men Who Have Sex With Men in Care. *Sex Transm Dis* 2012; 39:470-474.
24. Executive summary of the consensus document on post-exposure prophylaxis against HIV, HBV and HCV in adults and children. Panel of experts from the National AIDS Plan (PNS) AIDS Study Group (GeSIDA) , Spanish Society of Occupational Health Safety at Work (SEMST) , Spanish Society of Preventive Medicine Public Health Hygiene (SEMPSPH) , Spanish Association of Specialists in Occupational Medicine (AEEMT) , Spanish Society of Occupational Health in Public Administration (SESLAP) , National Association of Occupational Medicine in Health (ANMTAS) , Spanish Society of Paediatric Infectology (SEIP) , Spanish Society for Emergency Medicine (SEMES) , Study Group for Viral Hepatitis-SEIMC (GEHEP) , Spanish Federation of Occupational Health Nursing (FEDEET). *Enferm Infecc Microbiol Clin*. 2016;34 (2):122–131.
  25. Sexually Transmitted Infections in Primary Care 2013 (RCGP/BASHH) by Lazaro N. available at [www.rcgp.org](http://www.rcgp.org) and [www.bashh.org/guidelines](http://www.bashh.org/guidelines)
  26. Triplicat GS, Radcliffe K, Evans C, Gomberg M et al. 2015 European guidelines for the management of partners of persons with sexually transmitted infections. *JEADV* 2015; 29:1251-1257.
  27. Ferreira A, Young T, Mathews C, Zunza M, Low N. Strategies for partner notification for sexually transmitted infections, including HIV. *Cochrane Database of Systematic Reviews* 2013, Issue 10. Art. No.: CD002843. DOI: 10.1002/14651858.CD002843.pub2.
  28. Garcia de Olalla P, Molas E, Barberà MJ, Martín S, Arellano E, Gosch M, Saladie P, Carbonell T, Knobel H, Diez E, Caylà JA. Effectiveness of a pilot partner notification program for new HIV cases in Barcelona, Spain. *PLoS One*. 2015 Apr 7;10(4):e0121536.
  29. Gatell J, Clotet B, Podzamczak D, Miró J, Mallolas J. Guía práctica del sida. Clínica, diagnóstico y tratamiento 2015. Editorial: ESCOFET ZAMORA. ISBN: 978-84-88825-17-9
  30. Guía de Práctica Clínica de GeSIDA. Manejo de las hepatitis virales en pacientes Infectados por el VIH (Febrero 2015). Disponible en: [http://www.gesida-seimc.org/guias\\_clinicas.php?mn\\_MP=406&mn\\_MS=410](http://www.gesida-seimc.org/guias_clinicas.php?mn_MP=406&mn_MS=410)
  31. Orden SSI/445/2015, de 9 de marzo, por la que se modifican los anexos I, II y III del Real Decreto 2210/1995, de 28 de diciembre, por el que se crea la Red Nacional de Vigilancia Epidemiológica, relativos a la lista de enfermedades de declaración obligatoria, modalidades de declaración y enfermedades endémicas de ámbito regional.
  32. Centro Nacional de Epidemiología. Instituto de Salud Carlos III. Red Nacional de Vigilancia Epidemiológica. Protocolos de la Red Nacional de Vigilancia Epidemiológica. Madrid, 2013. Disponible: [http://www.isciii.es/ISCIII/es/contenidos/fd-servicios-cientifico-tecnicos/fd-vigilancias-alertas/fd-procedimientos/PROTOCOLOS\\_RENAVE-ciber.pdf](http://www.isciii.es/ISCIII/es/contenidos/fd-servicios-cientifico-tecnicos/fd-vigilancias-alertas/fd-procedimientos/PROTOCOLOS_RENAVE-ciber.pdf)
  33. Guidance on the Clinical Management of Acute and Chronic Harms of Club Drugs and Novel Psychoactive Substances. Disponible en <http://neptune-clinical-guidance.co.uk/wp-content/uploads/2015/03/NEPTUNE-Guidance-March-2015.pdf> . Acceso Marzo 2015
  34. Organization of a consultation for sexually transmitted diseases. Guidelines of International union against sexually transmitted infections. Disponible en <http://www.iusti.org/regions/Europe/euroguidelines.htm> .
  35. Diagnóstico microbiológico de las infecciones de transmisión sexual y otras infecciones genitales. 2007. Procedimientos en Microbiología Clínica. <https://www.seimc.org/contenidos/documentoscientificos/procedimientosmicrobiologia/seimc-procedimientomicrobiologia24.pdf>. Acceso el 14 de abril de 2016.
  36. Van Der Pol B, Taylor SN, Liesenfeld O, Williams JA, Hook EW 3rd. Vaginal swabs are the optimal specimen for detection of genital Chlamydia trachomatis or Neisseria gonorrhoeae using the Cobas 4800 CT/NG test. *Sex Transm Dis*. 2013; 40: 247-50.
  37. Reagan MM, Xu H, Shih SL, Secura GM, Peipert JF. A randomized trial of home versus clinic-based sexually transmitted disease screening among men. *Sex Transm Dis*. 2012; 39: 842-7.
  38. Pogany L, Romanowski B, Robinson J, Gale-Rowe M , Latham-Carmanico C, Weir C et al. Management of gonococcal infection among adults and youth: New key recommendations. *Can Fam Physician*. 2015 Oct; 61(10):869-73, e451-6.
  39. Gonococcal antimicrobial susceptibility surveillance in Europe 2013. ECDC. <http://ecdc.europa.eu/en/publications/Publications/gonococcal-antimicrobial-susceptibility-surveillance-europe-2013.pdf>. Fecha de consulta 09.04.2016.

40. Unemo M. Current and future antimicrobial treatment of gonorrhoea - the rapidly evolving *Neisseria gonorrhoeae* continues to challenge. *BMC Infect Dis.* 2015 Aug 21;15:364. doi: 10.1186/s12879-015-1029-2.
41. Zhang, Nan; Wang, Rong; Li, Xue; et al. Are *Ureaplasma* spp. a Cause of Nongonococcal Urethritis? A Systematic Review and Meta-Analysis *PLOS ONE* Volumen: 9 Número: 12 Número de artículo: e113771 Fecha de publicación: DEC 2 2014
42. Moi H, Blee K, Horner P. Management of non-gonococcal urethritis *BMC Infect Dis.* 2015; 15: 294. Published online 2015 Jul 29. doi: 10.1186/s12879-015-1043-4
43. Couldwell, Deborah L, Lewis, David A. *Mycoplasma genitalium* infection: current treatment options, therapeutic failure, and resistance-associated mutations. *INFECTION AND DRUG RESISTANCE* Volumen: 8 Páginas: 147-161 Fecha de publicación: 2015
44. Horner P, Blee K., Falk L, Van der Meijden W, Moi, H. 2016 European Guideline on the management of non-gonococcal urethritis <http://www.iusti.org/regions/europe/pdf/2016/2016EuropeanNGUGuideline.pdf>
45. Skov J, Cusini M, Gomberg M. 2016 European guideline on *Mycoplasma genitalium* infections. <http://www.iusti.org/regions/europe/pdf/2016/2016EuropeanMycoplasmaGuidelines.pdf>
46. Marrazzo J. Acute cervicitis. Uptodate. [http://www.uptodate.com.proxy1.athensams.net/contents/acute-cervicitis?source=search\\_result&search=cervicitis&selectedTitle=1~70](http://www.uptodate.com.proxy1.athensams.net/contents/acute-cervicitis?source=search_result&search=cervicitis&selectedTitle=1~70). Consultado 9.04.2016.
47. Muñoz J.L, Oluwatosi J.G. *Mycoplasma genitalium*: an emerging sexually transmitted infection *Scientifica* (Cairo). 2016; 2016: 7537318. Published online 2016 Feb 29. doi: 10.1155/2016/7537318. Consultado 6.04.2016
48. de Vries HJ, Zingoni A, White JA, Ross JD, Kreuter A. European Guideline on the management of proctitis, proctocolitis and enteritis caused by sexually transmissible pathogens. *Int J STD AIDS.* 2014 Jun;25(7):465-74.
49. Bignell C, Unemo M, et al. 2012 European Guideline on the Diagnosis and Treatment of Gonorrhoea in Adults. *IUSTI.* Nov 2014
50. Kirkcaldy RD, Weinstock HS, Moore PC, Philip SS, Wiesenfeld HC, Papp JR, Kerndt PR, Johnson S, Ghanem KG, Hook EW. The efficacy and safety of gentamicin plus azithromycin and gemifloxacin plus azithromycin as treatment of uncomplicated gonorrhea. *Clin Infect Dis.* 2014 Oct 15;59 (8):1083-91.
51. Lanjouw E1, Ouburg S2, de Vries HJ3, Stary A4, Radcliffe K5, Unemo M6. 2015 European guideline on the management of *Chlamydia trachomatis* infections. *Int J STD AIDS.* 2016 Apr;27(5):333-48.
52. Rodríguez-Domínguez M1, Puerta T, Menéndez B, González-Alba JM, Rodríguez C, Hellín T, Vera M, González-Sainz FJ, Clavo P, Villa M, Cantón R, Del Romero J, Galán JC. Clinical and epidemiological characterization of a lymphogranuloma venerum outbreak in Madrid, Spain: co-circulation of two variants. *Clin Microbiol Infect.* 2014 Mar;20(3):219-25.
53. Bautista C, Wurapa, Saterén W, Morris S, Hollingsworth B, Sánchez J.L. Bacterial vaginosis: a synthesis of the literature on etiology, prevalence, risk factors, and relationship with chlamydia and gonorrhea infections. *Mil Med Res.* 2016; 3: 4. Published online 2016 Feb 13. doi: 10.1186/s40779-016-0074-5
54. Bradshaw CS, Brotman RM. Making inroads into improving treatment of bacterial vaginosis - striving for long-term cure. *BMC Infect Dis.* 2015 Jul 29;15:292. doi: 10.1186/s12879-015-1027-4.
55. Sobel J. D. Bacterial vaginosis. Uptodate. [http://www.uptodate.com.proxy1.athensams.net/contents/bacterialvaginosis?source=search\\_result&search=vaginosis+bacteriana&selectedTitle=1~98](http://www.uptodate.com.proxy1.athensams.net/contents/bacterialvaginosis?source=search_result&search=vaginosis+bacteriana&selectedTitle=1~98). Consultado 11.04.2016.
56. Fornari G, Vicente VA, Gomes RR, Muro MD, Pinheiro RL, Ferrari C, Herkert PF, Takimura M, Carvalho NS, Queiroz-Telles F. Susceptibility and molecular characterization of *Candida* species from patients with vulvovaginitis. *Braz J Microbiol.* 2016 Mar 2. pii: S1517-8382(16)00052-6. doi: 10.1016/j.bjm.2016.01.005.
57. Boatto HF, Girão MJ, de Moraes MS, Francisco EC, Gompertz OF. The role of the symptomatic and asymptomatic sexual partners in the recurrent vulvovaginitis *Rev Bras Ginecol Obstet.* 2015 Jul;37(7):314-8. doi: 10.1590/S0100-720320150005098.
58. Kumari V, Banerjee T, Kumar P, Pandey S, Tilak R. Emergence of non-albicans *Candida* among candidal vulvovaginitis cases and study of their potential virulence

- factors, from a tertiary care center, North India. *Indian J Pathol Microbiol.* 2013 Apr-Jun;56(2):144-7. Doi: 10.4103/0377-4929.118703.
59. Achkar J, Fries B. Candida Infections of the Genitourinary Tract *CLINICAL MICROBIOLOGY REVIEWS*, Apr. 2010, p. 253–273 Vol. 23, No. 2 doi:10.1128/CMR.00076-09
60. Dovnik A, Golle A, Novak D, Arko D, Takač I<sup>4</sup>Treatment of vulvovaginal candidiasis: a review of the literature. *Acta Dermatovenereol Alp Pannonica Adriat.* 2015;24(1):5-7.
61. Kissinger P. Trichomonas vaginalis: a review of epidemiologic, clinical and treatment issues. *BMC Infect Dis.* 2015 Aug 5;15:307. doi: 10.1186/s12879-015-1055-0.
62. Sobel J. D. Tricomoniiasis. Up todate. [http://www.uptodate-com.proxy1.athensams.net/contents/trichomoniasis?source=search\\_result&search=trichomoniasis+vaginal&selectedTitle=1~150](http://www.uptodate-com.proxy1.athensams.net/contents/trichomoniasis?source=search_result&search=trichomoniasis+vaginal&selectedTitle=1~150). Consultado 10.04.2016.
63. Sobel J.D. Candida vulvovaginitis. Up todate. [http://www.uptodate-com.proxy1.athensams.net/contents/candidavulvovaginitis?source=search\\_result&search=candidiasis+vulvovaginal&selectedTitle=1~150](http://www.uptodate-com.proxy1.athensams.net/contents/candidavulvovaginitis?source=search_result&search=candidiasis+vulvovaginal&selectedTitle=1~150). Consultado 9/06/2016.
64. Sánchez del Río J, Varela Uria JA. Patología genital no ITS. ITS y otras dermatosis. Año 1, nº 1 2010:36-43.
65. Edwards SK. European Guideline for the Management of balanopostitis. *International Journal of STD&AIDS* 2001;12(Suppl.3):68-72.
66. Ferrandez Pulido C, de Torres I, García-Patos V. Carcinoma escamoso de pene. *Actas Dermosifiliograf.* 2012; 103:478-87.
67. Street EJ, Portman MD2, Kopa Z, Brendish NJ, Skerlev M, Wilson JD, Patel R. 2012 European guideline on the management of epididymo-orchitis. [http://www.iusti.org/regions/europe/pdf/2013/Epididymo-orchitis-2013IUSTI\\_WHO.pdf](http://www.iusti.org/regions/europe/pdf/2013/Epididymo-orchitis-2013IUSTI_WHO.pdf)
68. Emma Street, Adrian Joyce,, Janet Wilson. 2010 United Kingdom national guideline for the management of epididymo-orchitis. Clinical Effectiveness Group, British Association for Sexual Health and HIV. <http://www.bashh.org/documents/3546.pdf>
69. Brunham RC, Gottlieb SL, Paavonen J. Pelvic inflammatory disease. *N Engl J Med* 2015; 372:2039.
70. Ford, GV, Decker CF. Pelvic inflammatory disease. Disease a month 2016. DOI: <http://dx.doi.org/10.1016/j.disamonth.2016.03.015>
71. Sojo Dorado J, Olmo Montes J., Peñas Espinar C., Muniain Ezcurra MA. Protocolo diagnóstico y terapéutico de las úlceras genitales. *Medicina* 2014; 11: 3024-28.
72. Garland SM, Steben M. Genital herpes. *Best Practice & Research Clinical Obstetrics and Gynaecology* 28 (2014) 1098e1110.
73. Patel R. Genital herpes. *Medicine* 2014; 42:7.
74. Bechtel M, Trout W. Sexually transmitted diseases. *Clinical obstetrics and gynecology* 58; 172-184.
75. Patel R, Alderson S, geretti A, Nilsen A, Foley E, Lautenschlager S et al. 2010 European guideline for the management of genital herpes. En: [www.iusti.org/regions/Europe/pdf/2010/Euro\\_Guideline\\_210\\_herpes.pdf](http://www.iusti.org/regions/Europe/pdf/2010/Euro_Guideline_210_herpes.pdf)
76. WHO Guidelines for the WHO guidelines for the treatment of genital herpes simplex virus infections. Geneva: World Health Organization; 2016 (<http://www.who.int/reproductivehealth/publications/rtis/genital-HSV-treatment-guidelines/en/>, accessed 16 march 2017).
77. O'Farrell N. Tropical sexually transmitted infections (excluding lymphogranuloma venereum). *Medicine* 2014; 42: 6.
78. Kimberlin DW, Balley J; Committee on Infectious Diseases and Committee on fetus and newborn. Guidance on management of asymptomatic neonates born to women with active genital herpes lesions. *Pediatrics* 2013;131:e635-e646.
79. Basta-Juzbasic A, Ceovic R. Chancroid, lymphogranuloma venereum, granuloma inguinale, genital herpes simplex infection and molluscum contagiosum. *Clin in Dermatology* 2014; 32: 290-298.
80. O'Farrell N. 2016 European Guidelines on donovanosis. En: [www.iusti.org/regions/Europe/pdf/2016/Donovanosis2016.pdf](http://www.iusti.org/regions/Europe/pdf/2016/Donovanosis2016.pdf). Consultado octubre 2016
81. M. Glatz, N. Juricevic, M. Altwegg, S. Bruisten, P. Komericki, S. Lautenschlager et al. A multicenter prospective trial to asses a new real-time polymerase chain reaction for detection of

- Treponema pallidum*, herpes simplex-1/2 and *Haemophilus ducreyi* in genital, anal and oropharyngeal ulcers. *Clin Microbiol Infect* 2014; 20: O1020–O1027
82. Wheeler HL, Agarwal S, Goh BT. Dark ground microscopy and treponemal serological tests in the diagnosis of early syphilis. *Sex Transm Infect* 2004; 80:411-4.
83. Gayet-Ageron A, Lautenschlager S, Ninet B, Perneger TV, Combescure C. Sensitivity, specificity and likelihood ratios of PCR in the diagnosis of syphilis: a systematic review and meta-analysis. *Sex Transm Infect* 2013; 89:251-6.
84. Ballard R, Hook EW III. Syphilis. En: Unemo M, Ballard R, Ison C, Lewis D, Ndowa F, Peeling R, eds. *Laboratory diagnosis of sexually transmitted infections, including human immunodeficiency virus*. World Health Organization (WHO), Geneva, Switzerland, 2013: 107–129.
85. Janier M, Hegyi V, Dupin N, Unemo M, Tiplica GS, Potočník M, et al. 2014 European guideline on the management of syphilis. *J Eur Acad Dermatol Venereol* 2014; 28:1581-93.
86. Tong ML, Lin LR, Liu LL, Zhang HL, Huang SJ, Chen YY, et al. Analysis of 3 algorithms for syphilis serodiagnosis and implications for clinical management. *Clin Infect Dis* 2014; 58:1116-24.
87. Kingston M, French P, Higgins S, McQuillan O, Sukthankar A, Stott C, et al. UK national guidelines on the management of syphilis 2015. *Int J STD AIDS*. 2016; 27:421-446.
88. Rolfs RT, Joesoef MR, Hendershot EF, Rompalo AM, Augenbraun MH, Chiu M, Bolan G, et al. A randomized trial of enhanced therapy for early syphilis in patients with and without human immunodeficiency virus infection. The Syphilis and HIV Study Group. *N Engl J Med* 1997; 337:307-314.
89. Ganesan A, Mesner O, Okulicz JF, O'Bryan T, Deiss RG, Lalani T, Whitman TJ, et al. A single dose of benzathine penicillin G is as effective as multiple doses of benzathine penicillin G for the treatment of HIV-infected persons with early syphilis. *Clin Infect Dis* 2015; 60:653-660.
90. Wong T, Singh AE, De P. Primary syphilis: serological treatment response to doxycycline/tetracycline versus benzathine penicillin. *Am J Med* 2008; 121:903-908.
91. Mitchell SJ, Engelman J, Kent CK, Lukehart SA, Godornes C, Klausner JD. Azithromycin-resistant syphilis infection: San Francisco, California, 2000-2004. *Clin Infect Dis* 2006; 42:337-345.
92. Nathan L, Bawdon RE, Sidawi JE, Stettler RW, McIntire DM, Wendel GD, Jr. Penicillin levels following the administration of benzathine penicillin G in pregnancy. *Obstet Gynecol* 1993; 82:338-342.
93. Shann S, Wilson J. Treatment of neurosyphilis with ceftriaxone. *Sex Transm Infect* 2003; 79:415-416.
94. Sena AC, Wolff M, Martin DH, Behets F, Van Damme K, Leone P, et al. Predictors of serological cure and Serofast State after treatment in HIV-negative persons with early syphilis. *Clin Infect Dis* 2011; 53:1092-1099.
95. Marra CM, Maxwell CL, Tantalo L, Eaton M, Rompalo AM, Raines C, et al. Normalization of cerebrospinal fluid abnormalities after neurosyphilis therapy: does HIV status matter? *Clin Infect Dis* 2004; 38:1001-1006.
96. Marra CM, Maxwell CL, Tantalo LC, Sahi SK, Lukehart SA. Normalization of serum rapid plasma reagin titer predicts normalization of cerebrospinal fluid and clinical abnormalities after treatment of neurosyphilis. *Clin Infect Dis* 2008; 47:893-899.
97. Castellsague X. Natural history and epidemiology of HPV infection and cervical cancer. *Gynecol Oncol* 2008; 110 (3 Suppl 2): S4-S7.
98. Forman D, de Martel C, Lacey CJ, et al. Global burden of human papillomavirus and related diseases. *Vaccine* 2012; 30 Suppl 5: F12-23.
99. Jemal A, Simard EP, Dorell C, Noone AM, Markowitz LE, Kohler B et al. Annual Report to the Nation on the Status of Cancer, 1975-2009, featuring the burden and trends in human papillomavirus (HPV)-associated cancers and HPV vaccination coverage levels. *J Natl Cancer Inst* 2013; 105:175-201.
100. De Pokomandy A, Rouleau D, Ghattas G, Vézina S, Côté P, Macleod J et al. Prevalence, clearance, and incidence of anal human papillomavirus infection in HIV-infected men: the HIVIRG cohort study. *J Infect Dis* 2009;199: 965-73.
101. Branca M, Costa S, Mariani L, Sesti F, Agarossi A, di Carlo A et al. Assessment of risk factors and human papillomavirus (HPV) related pathogenetic mechanisms of CIN in HIV-positive and

- HIV-negative women. Study design and baseline data of the HPV-pathogenISS study. *Eur J Gynecol Oncol* 2004; 25: 689-698.
102. Silverberg MJ, Lau B, Justice AC, Engels E, Gill MJ, Goedert JJ et al. Risk of anal cancer in HIV-infected and HIV-uninfected individuals in North America. *Clin Infect Dis* 2012; 54:1026-34.
103. Derkay CS, Wiatrak B. Recurrent respiratory papillomatosis: a review. *Laryngoscope* 2008; 118: 1236-47.
104. de Sanjose S, Quint WG, Alemany L, Geraets DT, Klaustermeier JE, Lloveras B et al. Human papillomavirus genotype attribution in invasive cervical cancer: a retrospective cross-sectional worldwide study. *Lancet Oncol* 2010; 11:1048-1056.
105. Alemany L, Saunier M, Alvarado-Cabrero I, Quiros B, Salmeron J, Shin HR et al. Human papillomavirus DNA prevalence and type distribution in anal carcinomas worldwide. *Int J Cancer* 2015; 136: 98-107.
106. Chin-Hong PV, Berry JM, Cheng SC, Catania JA, Da Costa M, Darragh TM et al. Comparison of patient- and clinician-collected anal cytology samples to screen for human papillomavirus-associated anal intraepithelial neoplasia in men who have sex with men. *Ann Intern Med* 2008; 149: 300-306.
107. Nathan M, Singh N. Performance of anal cytology in a clinical setting when measured against histology and high-resolution anoscopy findings. *AIDS* 2010; 24: 373-379.
108. Cuzick J, Sasieni P, Davies P, Adams J, Normand C, Frater A, et al. A systematic review of the role of human papillomavirus testing within a cervical screening programme. *Health Technol Assess* 1999; 3: i-iv,1-196.
109. Wright TC Jr., Schiffman M, Solomon D, Cox JT, Garcia F, Goldie S, et al. Interim guidance for the use of human papillomavirus DNA testing as an adjunct to cervical cytology for screening. *Obstet Gynecol* 2004; 103: 304-9.
110. Phanuphak N, Teeratakulpisarn N, Lim C, Changnam T, Kerr S, Deesua A, et al. Comparable performance of conventional and liquid-based cytology in diagnosing anal intraepithelial neoplasia in HIV-infected and -uninfected Thai men who have sex with men. *J Acquir Immune Defic Syndr* 2013; 63: 464-71.
111. Ronco G, Confortini M, Maccallini V, Naldoni C, Segnan N, Sideri M et al. Health technology assessment report. Use of liquid-based cytology for cervical cancer precursors screening. *Epidemiol Prev* 2012; 36:e1-e33.
112. Hidalgo-Tenorio C, Rivero-Rodriguez M, Gil-Anguita C, Esquivias J, López-Castro R, Ramírez-Taboada J et al. The role of polymerase chain reaction of high-risk human papilloma virus in the screening of high-grade squamous intraepithelial lesions in the anal mucosa of human immunodeficiency virus-positive males having sex with males. *PLoS One* 2015; 10: e0123590.
113. Goldstone SE, Enyinna ChS, Davis TW. Detection of oncogenic human papillomavirus and other predictors of anal high-grade dysplasia in men who have sex with men with abnormal cytology. *Dis Colon Rectum* 2009; 52: 31-39.
114. Berry JM, Palefsky JM, Jay N, Cheng SC, Darragh TM, Ching-Hong PV. Performance characteristics of anal cytology and human papillomavirus testing in patients with high resolution anoscopy-guided biopsy of high grade anal intraepithelial neoplasia. *Dis Colon Rectum* 2009; 52: 239-247.
115. Arbyn M, Roelens J, Simoons C, Buntinx F, Paraskevaidis E, Martin-Hirsch PP et al. Human papillomavirus testing versus repeat cytology for triage of minor cytological cervical lesions. *Cochrane Database Syst Rev* 2013; 28: CD008054.
116. Lam JM, Hoch JS, Tinmouth J, Sano M, Raboud J, Salit IE. Cost-effectiveness of screening for anal precancers in HIV-positive men. *AIDS* 2011; 13: 635-42.
117. Clinton LK, Miyazaki K, Ayabe A, Davis J, Tauchi-Nishi P, Shimizu D. The LAST guidelines in clinical practice: implementing recommendations for p16 use. *Am J Clin Pathol* 2015; 144: 844-9.
118. Torné Bladé A, del Pino Saladríguez M, Cusidó Gimferrer M, Alameda Quittllet F, Andia Ortiz D, Castellsagué Piqué X et al. Guía de cribado del cáncer de cuello de útero en España, 2014. *Rev Esp Patol* 2014; 47:1-43.
119. Panel de expertos de GeSIDA. Guía de práctica clínica sobre los tumores no defintorios de SIDA e infección por el VIH. GeSIDA. Enero 2014. Disponible en: <http://www.gesida-seimc.org/contenidos/guiasclinicas/2014/gesida-guiasclinicas-2014-TumoresNoDefintoriosSIDA.pdf>.

120. Nooij LS, Kagie MJ. See and treat approach for high-grade squamous intraepithelial cervical lesions. *Eur J Gynaecol Oncol* 2016; 37: 22-5.
121. Weis SE. Current treatment options for management of anal intraepithelial neoplasia. *Onco Targets and Therapy* 2013; 6: 651-665.
122. Pineda CE, Berry JM, Jay N, Palefsky JM, Welton ML. High-resolution anoscopy targeted surgical destruction of anal high-grade squamous intraepithelial lesions: a ten-year experience. *Dis Colon Rectum* 2008; 51: 829-837.
123. Goldstone RN, Goldstone AB, Russ J, Goldstone SE. Long-term follow-up of infrared coagulator ablation of anal high-grade dysplasia in men who have sex with men. *Dis Colon Rectum* 2011; 54:1284-92.
124. Marks DK, Goldstone SE. Electrocautery ablation of high-grade anal squamous intraepithelial lesions in HIV-negative and HIV-positive men who have sex with men. *J Acquir Immune Defic Syndr* 2012; 59: 259-265.
125. Chang GJ, Berry JM, Jay N, Palefsky JM, Welton ML. Surgical treatment of high-grade anal squamous intraepithelial lesions: a prospective study. *Dis Colon Rectum* 2002; 45: 453-458.
126. Richel O, de Vries HJ, Van Noesel CJ, Dijkgraaf MG, Prins JM. Comparison of imiquimod, topical fluorouracil, and electrocautery for the treatment of anal intraepithelial neoplasia in HIV-positive men who have sex with men: an open-label, randomised controlled trial. *Lancet Oncol* 2013; 14: 346-53.
127. Maw RD. Treatment of anogenital warts. *Dermatol Clin* 1998; 16: 829-34.
128. Devaraj B, Cosman BC. Expectant management of anal squamous dysplasia in patients with HIV. *Dis Colon Rectum* 2006; 49: 36-40.
129. Singh JC, Kuohung V, Palefsky JM. Efficacy of trichloroacetic acid in the treatment of anal intraepithelial neoplasia in HIV-positive and HIV-negative men who have sex with men. *J. Acquir Immune Defic Syndr* 2009; 52: 474-479.
130. Sendagorta E1, Bernardino JI, Álvarez-Gallego M, Feito M, Feltes R, Beato MJ, et al. Topical cidofovir to treat high-grade anal intraepithelial neoplasia in HIV-infected patients: a pilot clinical trial. *AIDS* 2016; 30: 75-82.
131. Deutsch E, Haie-Meder C, Bayar MA, Mondini M, Laporte M, Mazon R et al. Phase I trial evaluating the antiviral agent Cidofovir in combination with chemoradiation in cervical cancer patients. *Oncotarget* 2016; mar 21 (epub ahead of print).
132. Winer RL, Hughes JP, Feng Q, O'Reilly S, Kiviat NB, Holmes KK et al. Condom use and the risk of genital human papillomavirus infection in young women. *N Engl J Med* 2006; 354: 2645-2654.
133. Serrano B, de Sanjose S, Tous S, Quiros B, Munoz N, Bosch X et al. Human papillomavirus genotype attribution for HPVs 6, 11, 16, 18, 31, 33, 45, 52 and 58 in female anogenital lesions. *Eur J Cancer* 2015; 51:1732-1741.
134. Bruni L, Serrano B, Bosch X, Castellsague X. Vacuna frente al virus del papilloma humano. Eficacia y seguridad. *Enferm Infecc Microbiol Clin* 2015; 33: 342-354.
135. Ponencia de Programas y Registro de vacunaciones del Ministerio de Sanidad, Servicios Sociales e Igualdad. Revisión Abril 2016. Disponible en: [https://www.msssi.gob.es/profesionales/saludPublica/prevPromocion/vacunaciones/docs/Revisi on\\_CalendarioVacunacion.pdf](https://www.msssi.gob.es/profesionales/saludPublica/prevPromocion/vacunaciones/docs/Revisi%00n_CalendarioVacunacion.pdf)
136. Petrosky E, Bocchini JA Jr, Hariri S, Chesson H, Curtis CR, Saraiya M et al. Use of 9-valent human papillomavirus (HPV) vaccine: updated HPV vaccination recommendations of the advisory committee on immunization practices. *MMWR Morb Mortal Wkly Rep* 2015; 64: 300-4.
137. Joura EA, Garland SM, Paavonen J, Ferris DG, Perez G, Ault KA, et al. Effect of the human papillomavirus (HPV) quadrivalent vaccine in a subgroup of women with cervical and vulvar disease: retrospective pooled analysis of trial data. *BMJ* 2012; 344: e1401.
138. Swedish KA, Factor SH, Goldstone SE. Prevention of recurrent high-grade anal neoplasia with quadrivalent human papillomavirus vaccination of men who have sex with men: a nonconcurrent cohort study. *Clin Infect Dis* 2012; 54: 891-8.
139. Lorry G. Rubin, Myron J. Levin, Per Ljungman, E. Graham Davies, Robin Avery, Marcie Tomblyn et al. 2013 IDSA Clinical Practice Guideline for Vaccination of the Immunocompromised Host. *Clinical Infectious Diseases* 2014;58(3):e44-100
140. Elissa Meites; Allison Kempe; Lauri E. Markowitz. Use of a 2-Dose Schedule for Human Papillomavirus Vaccination — Updated Recommendations of the Advisory Committee on

- Immunization Practices. MMWR December 16, 2016 / 65(49);1405–1408. Disponible en: <https://www.cdc.gov/mmwr/volumes/65/wr/mm6549a5.htm>.*
141. *British Association for Sexual Health and HIV. United Kingdom National Guideline on the Management of Sexually Transmitted Infections and Related Conditions in Children and Young People. 2010. Consultado el 12 de abril de 2016. Disponible en: <http://www.bashh.org/documents/2674.pdf>*
142. *Hammerschlag MR. Sexual Assault and Abuse of Children. Clin Infect Dis. 2011;53:103–9.*
143. *Jenny C, Crawford-Jakubiak JE, and Committee on child abuse and neglect. The Evaluation of Children in the Primary Care Setting When Sexual Abuse Is Suspected. Pediatrics 2013;132:e558-e567.*
144. *Centers for Disease Control and Prevention. 2015 Sexually Transmitted Diseases Treatment Guidelines. Sexual Assault and Abuse and STDs. 2015. Consultado el 12 de abril de 2016. Disponible en: <http://www.cdc.gov/std/tg2015/sexual-assault.htm>*
145. *Seña AC, Hsu KK, Kellogg N, Girardet R, Christian CW, Linden J, et al. Sexual Assault and Sexually Transmitted Infections in Adults, Adolescents, and Children. Clin Infect Dis. 2015;61:856–64.*
146. *John CC, Salata RA. Tricomoniasis (Trichomonas vaginalis). En: Kliegman RM, Behrman RE, Jenson HB, Stanton BF, editores. Nelson. Tratado de Pediatría. Vol 1. 18ª ed. Barcelona: Elsevier; 2009: 1467-68.*
147. *Sexually transmitted diseases: overview of issues specific to adolescents. Uptodate March 2016. Fortenberry J. Consultado el 13 de abril de 2016. Disponible en: <http://www.uptodate.com/contents/sexually-transmitted-diseases-overview-of-issues-specific-to-adolescents>*
148. *Schilling S, Samuels-Kalow M, Gerber JS, Scribano PV, French B, Wood JN. Testing and Treatment After Adolescent Sexual Assault in Pediatric Emergency Departments. Pediatrics 2015 Dec;136 (6):e1495-503. doi: 10.1542/peds.2015-2093. Epub 2015 Nov 2.*
149. *OMS. Proyecto de Estrategia Mundial del Sector de la Salud contra las Infecciones de Transmisión Sexual para 2016-2021. Consultado el 13 de abril de 2016. Disponible en: [http://www.who.int/reproductivehealth/GHSS\\_STI\\_SP\\_06012016.pdf](http://www.who.int/reproductivehealth/GHSS_STI_SP_06012016.pdf)*
150. *Infecciones de transmisión sexual. Diagnóstico, tratamiento, prevención y control. Grupo de trabajo sobre ITS. Madrid. Ministerio de Sanidad. 2011. Consultado el 13 de abril de 2016. Disponible en: <http://www.msssi.gob.es/ciudadanos/enfLesiones/enfTransmisibles/sida/vigilancia/DocITS2011.pdf>*
151. *Incidence of sexually transmitted infections after human papillomavirus vaccination among adolescent females. Jena AB, Goldman DP, Seabury SA. JAMA Intern Med. 2015 Apr;175(4):617-23. doi: 10.1001/jamainternmed.2014.7886.*
152. *Calendario de vacunaciones de la AEO 2016. Consultado el 13 de abril de 2016. Disponible en: <http://vacunasaep.org/profesionales/calendario-de-vacunaciones-de-la-aep-2016>.*
